# Supplementary material for: Integrated miRNAome, transcriptome, and degradome analyses reveal the role of miRNA–mRNA modules in the biosynthesis of oridonin in Isodon rubescens
Source: Frontiers journal article supplement (doi:10.3389/fpls.2025.1566354), 2025-06-18
Supplement: Data_Sheet_1.zip [file Data_Sheet_1.zip]

## Sheet: Sheet1
Supplementary Table S16 Targets prediction of miRNAs and function analyses based on degradome analyses
Query	Transcript	GnenID	Description	GO	KEGG
aly-miR157d-3p_1ss10GT	RrubChr10G00242410.1	RrubChr10G00242410	ninja-family protein AFP1-like [Sesamum indicum]	GO:0005515(protein binding);GO:0005634(nucleus);GO:0007165(signal transduction);GO:0009414(response to water deprivation);GO:0009737(response to abscisic acid)	ko04144(Endocytosis)
aly-miR157d-3p_1ss10GT	RrubChr10G00250340.1	RrubChr10G00250340	26S proteasome regulatory complex, subunit PSMD10 [Handroanthus impetiginosus]	GO:0005886(plasma membrane);GO:0016021(integral component of membrane)	ko00040(Pentose and glucuronate interconversions)
aly-miR157d-3p_1ss10GT	RrubChr10G00258370.1	RrubChr10G00258370	PREDICTED: histone acetyltransferase GCN5 isoform X1 [Erythranthe guttata]	GO:0000123(histone acetyltransferase complex);GO:0003677(DNA binding);GO:0004402(histone acetyltransferase activity);GO:0005515(protein binding);GO:0005634(nucleus);GO:0006351(transcription, DNA-templated);GO:0009416(response to light stimulus);GO:0009908(flower development);GO:0010015(root morphogenesis);GO:0010321(regulation of vegetative phase change);GO:0010484(H3 histone acetyltransferase ac…	NA
aly-miR157d-3p_1ss10GT	RrubChr11G00261080.1	RrubChr11G00261080	hypothetical protein MIMGU_mgv1a016527mg [Erythranthe guttata]	GO:0003674(molecular_function);GO:0005634(nucleus);GO:0005739(mitochondrion);GO:0005747(mitochondrial respiratory chain complex I);GO:0005758(mitochondrial intermembrane space);GO:0009853(photorespiration);GO:0031966(mitochondrial membrane);GO:0045271(respiratory chain complex I);GO:0055114(oxidation-reduction process)	ko00190(Oxidative phosphorylation)
aly-miR157d-3p_1ss10GT	RrubChr11G00272410.1	RrubChr11G00272410	probable leucine-rich repeat receptor-like protein kinase At5g49770 isoform X1 [Sesamum indicum]	GO:0004674(protein serine/threonine kinase activity);GO:0005524(ATP binding);GO:0005576(extracellular region);GO:0005773(vacuole);GO:0005886(plasma membrane);GO:0006468(protein phosphorylation);GO:0016021(integral component of membrane);GO:0016301(kinase activity)	NA
aly-miR157d-3p_1ss10GT	RrubChr11G00272650.1	RrubChr11G00272650	PREDICTED: calcium-dependent protein kinase 3-like [Gossypium arboreum]	GO:0004672(protein kinase activity);GO:0004674(protein serine/threonine kinase activity);GO:0004683(calmodulin-dependent protein kinase activity);GO:0005509(calcium ion binding);GO:0005515(protein binding);GO:0005516(calmodulin binding);GO:0005524(ATP binding);GO:0005634(nucleus);GO:0005737(cytoplasm);GO:0005773(vacuole);GO:0005829(cytosol);GO:0005886(plasma membrane);GO:0006468(protein phosphory…	ko04626(Plant-pathogen interaction)
aly-miR157d-3p_1ss10GT	RrubChr11G00274820.1	RrubChr11G00274820	heme oxygenase 1, chloroplastic [Sesamum indicum]	GO:0004392(heme oxygenase (decyclizing) activity);GO:0005515(protein binding);GO:0006788(heme oxidation);GO:0009507(chloroplast);GO:0009585(red, far-red light phototransduction);GO:0009813(flavonoid biosynthetic process);GO:0010019(chloroplast-nucleus signaling pathway);GO:0010024(phytochromobilin biosynthetic process);GO:0010075(regulation of meristem growth);GO:0010119(regulation of stomatal mo…	ko00860(Porphyrin and chlorophyll metabolism)
aly-miR157d-3p_1ss10GT	RrubChr12G00284560.1	RrubChr12G00284560	PREDICTED: probable carboxylesterase 17 [Erythranthe guttata]	GO:0005634(nucleus);GO:0008152(metabolic process);GO:0016787(hydrolase activity);GO:0052689(carboxylic ester hydrolase activity)	ko04075(Plant hormone signal transduction)
aly-miR157d-3p_1ss10GT	RrubChr12G00298980.1	RrubChr12G00298980	calreticulin isoform X1 [Helianthus annuus]	GO:0005509(calcium ion binding);GO:0005739(mitochondrion);GO:0005773(vacuole);GO:0005783(endoplasmic reticulum);GO:0005788(endoplasmic reticulum lumen);GO:0005794(Golgi apparatus);GO:0006457(protein folding);GO:0006979(response to oxidative stress);GO:0009507(chloroplast);GO:0009651(response to salt stress);GO:0030246(carbohydrate binding);GO:0048046(apoplast);GO:0051082(unfolded protein binding)	ko04141(Protein processing in endoplasmic reticulum);ko04145(Phagosome)
aly-miR157d-3p_1ss10GT	RrubChr12G00299910.1	RrubChr12G00299910	PREDICTED: hydrophobic protein RCI2B-like [Erythranthe guttata]	GO:0009409(response to cold);GO:0016021(integral component of membrane)	NA
aly-miR157d-3p_1ss10GT	RrubChr1G00006880.1	RrubChr1G00006880	PREDICTED: probable receptor-like protein kinase At1g67000 [Erythranthe guttata]	GO:0004675(transmembrane receptor protein serine/threonine kinase activity);GO:0005886(plasma membrane);GO:0009506(plasmodesma);GO:0009620(response to fungus);GO:0016301(kinase activity)	NA
aly-miR157d-3p_1ss10GT	RrubChr1G00013360.1	RrubChr1G00013360	ATP-dependent zinc metalloprotease FTSH, chloroplastic-like [Sesamum indicum]	GO:0004176(ATP-dependent peptidase activity);GO:0005739(mitochondrion);GO:0006508(proteolysis);GO:0008237(metallopeptidase activity);GO:0009535(chloroplast thylakoid membrane);GO:0009941(chloroplast envelope);GO:0010027(thylakoid membrane organization);GO:0010205(photoinhibition);GO:0010206(photosystem II repair);GO:0010304(PSII associated light-harvesting complex II catabolic process)	NA
aly-miR157d-3p_1ss10GT	RrubChr2G00031850.1	RrubChr2G00031850	hypothetical protein CDL12_03016 [Handroanthus impetiginosus]	NA	NA
aly-miR157d-3p_1ss10GT	RrubChr3G00058800.1	RrubChr3G00058800	Ca2+-independent phospholipase A2 [Handroanthus impetiginosus]	GO:0004620(phospholipase activity);GO:0005886(plasma membrane);GO:0006644(phospholipid metabolic process);GO:0016042(lipid catabolic process);GO:0019374(galactolipid metabolic process);GO:0040008(regulation of growth);GO:0047617(acyl-CoA hydrolase activity);GO:0051707(response to other organism)	NA
aly-miR157d-3p_1ss10GT	RrubChr3G00077080.1	RrubChr3G00077080	probable splicing factor 3A subunit 1 [Sesamum indicum]	GO:0000381(regulation of alternative mRNA splicing, via spliceosome);GO:0000389(mRNA 3'-splice site recognition);GO:0003723(RNA binding);GO:0005686(U2 snRNP);GO:0071004(U2-type prespliceosome);GO:0071013(catalytic step 2 spliceosome)	ko03040(Spliceosome)
aly-miR157d-3p_1ss10GT	RrubChr6G00143000.1	RrubChr6G00143000	PREDICTED: aquaporin PIP1-1 isoform X1 [Malus domestica]	GO:0005773(vacuole);GO:0005886(plasma membrane);GO:0005887(integral component of plasma membrane);GO:0006810(transport);GO:0006833(water transport);GO:0009414(response to water deprivation);GO:0009507(chloroplast);GO:0009651(response to salt stress);GO:0015250(water channel activity);GO:0015267(channel activity);GO:0015670(carbon dioxide transport);GO:0016020(membrane);GO:0016021(integral compone…	NA
aly-miR157d-3p_1ss10GT	RrubChr6G00143820.1	RrubChr6G00143820	hypothetical protein CDL12_11131 [Handroanthus impetiginosus]	GO:0005768(endosome);GO:0005774(vacuolar membrane);GO:0005802(trans-Golgi network);GO:0008757(S-adenosylmethionine-dependent methyltransferase activity);GO:0032259(methylation)	NA
aly-miR157d-3p_1ss10GT	RrubChr6G00159050.1	RrubChr6G00159050	G-type lectin S-receptor-like serine/threonine-protein kinase SD3-1 [Sesamum indicum]	GO:0004674(protein serine/threonine kinase activity);GO:0005886(plasma membrane);GO:0006468(protein phosphorylation)	NA
aly-miR157d-3p_1ss10GT	RrubChr6G00160660.1	RrubChr6G00160660	basic helix-loop-helix transcription factor [Salvia miltiorrhiza]	GO:0001046(core promoter sequence-specific DNA binding);GO:0001228(transcriptional activator activity, RNA polymerase II transcription regulatory region sequence-specific DNA binding);GO:0005634(nucleus);GO:0006366(transcription by RNA polymerase II)	NA
aly-miR157d-3p_1ss10GT	RrubChr7G00170880.1	RrubChr7G00170880	protein TIME FOR COFFEE [Sesamum indicum]	GO:0003674(molecular_function);GO:0005634(nucleus);GO:0005982(starch metabolic process);GO:0006979(response to oxidative stress);GO:0009414(response to water deprivation);GO:0009737(response to abscisic acid);GO:0032502(developmental process);GO:0042752(regulation of circadian rhythm);GO:0048511(rhythmic process)	NA
aly-miR157d-3p_1ss10GT	RrubChr7G00172190.1	RrubChr7G00172190	uncharacterized protein LOC105178376 [Sesamum indicum]	GO:0003674(molecular_function);GO:0005634(nucleus);GO:0008150(biological_process)	NA
aly-miR157d-3p_1ss10GT	RrubChr7G00172260.1	RrubChr7G00172260	Branched chain alpha-keto acid dehydrogenase complex, alpha subunit [Handroanthus impetiginosus]	GO:0003863(3-methyl-2-oxobutanoate dehydrogenase (2-methylpropanoyl-transferring) activity);GO:0005739(mitochondrion);GO:0005759(mitochondrial matrix);GO:0016624(oxidoreductase activity, acting on the aldehyde or oxo group of donors, disulfide as acceptor);GO:0046872(metal ion binding);GO:0055114(oxidation-reduction process)	ko00640(Propanoate metabolism);ko00280(Valine, leucine and isoleucine degradation)
aly-miR157d-3p_1ss10GT	RrubChr7G00186500.1	RrubChr7G00186500	uncharacterized protein LOC105177275 isoform X1 [Sesamum indicum]	GO:0003674(molecular_function);GO:0005634(nucleus);GO:0008150(biological_process)	NA
aly-miR157d-3p_1ss10GT	RrubChr9G00234960.1	RrubChr9G00234960	aspartate aminotransferase, chloroplastic isoform X1 [Olea europaea var. sylvestris]	GO:0004069(L-aspartate:2-oxoglutarate aminotransferase activity);GO:0005739(mitochondrion);GO:0030170(pyridoxal phosphate binding);GO:0042802(identical protein binding)	ko00250(Alanine, aspartate and glutamate metabolism);ko00270(Cysteine and methionine metabolism);ko00220(Arginine biosynthesis);ko00330(Arginine and proline metabolism);ko00350(Tyrosine metabolism);ko00360(Phenylalanine metabolism);ko00400(Phenylalanine, tyrosine and tryptophan biosynthesis);ko00950(Isoquinoline alkaloid biosynthesis);ko00960(Tropane, piperidine and pyridine alkaloid biosynthesis)
aly-miR157d-3p_1ss10GT	RrubChr1G00007170.1	RrubChr1G00007170	Serine/threonine protein kinase [Handroanthus impetiginosus]	GO:0004674(protein serine/threonine kinase activity);GO:0005524(ATP binding);GO:0005886(plasma membrane);GO:0006468(protein phosphorylation);GO:0016021(integral component of membrane);GO:0016301(kinase activity)	NA
aly-miR157d-3p_1ss10GT	RrubChr1G00008400.1	RrubChr1G00008400	PREDICTED: uncharacterized protein LOC105966334 [Erythranthe guttata]	GO:0005737(cytoplasm);GO:0030001(metal ion transport);GO:0046914(transition metal ion binding);GO:0046916(cellular transition metal ion homeostasis)	NA
aly-miR157d-3p_1ss10GT	RrubChr1G00015750.1	RrubChr1G00015750	Histone acetyltransferase [Handroanthus impetiginosus]	GO:0003677(DNA binding);GO:0005634(nucleus);GO:0006355(regulation of transcription, DNA-templated)	NA
aly-miR157d-3p_1ss10GT	RrubChr2G00043870.1	RrubChr2G00043870	transcription and mRNA export factor SUS1 [Sesamum indicum]	GO:0000124(SAGA complex);GO:0003682(chromatin binding);GO:0003713(transcription coactivator activity);GO:0006357(regulation of transcription by RNA polymerase II);GO:0016578(histone deubiquitination);GO:0016973(poly(A)+ mRNA export from nucleus);GO:0071819(DUBm complex)	NA
aly-miR157d-3p_1ss10GT	RrubChr3G00064370.1	RrubChr3G00064370	vicilin-like seed storage protein At2g18540 isoform X1 [Carica papaya]	GO:0003674(molecular_function);GO:0005634(nucleus);GO:0008150(biological_process)	NA
aly-miR157d-3p_1ss10GT	RrubChr6G00147750.1	RrubChr6G00147750	probable mannan synthase 11 isoform X1 [Sesamum indicum]	GO:0000139(Golgi membrane);GO:0005794(Golgi apparatus);GO:0010192(mucilage biosynthetic process);GO:0016021(integral component of membrane);GO:0016757(transferase activity, transferring glycosyl groups);GO:0047259(glucomannan 4-beta-mannosyltransferase activity);GO:0048359(mucilage metabolic process involved in seed coat development);GO:0051753(mannan synthase activity);GO:0071555(cell wall organ…	NA
aly-miR157d-3p_1ss10GT	RrubChr8G00206690.1	RrubChr8G00206690	hypothetical protein CDL12_06148 [Handroanthus impetiginosus]	GO:0003674(molecular_function);GO:0008150(biological_process);GO:0009507(chloroplast)	NA
aly-miR157d-3p_1ss10GT	RrubChr8G00209020.1	RrubChr8G00209020	triose phosphate/phosphate translocator, chloroplastic [Sesamum indicum]	GO:0034219(carbohydrate transmembrane transport)	NA
aly-miR157d-3p_1ss10GT	RrubChr9G00217290.1	RrubChr9G00217290	protein ENHANCED DISEASE RESISTANCE 2 [Sesamum indicum]	GO:0005634(nucleus);GO:0005886(plasma membrane);GO:0007165(signal transduction);GO:0035091(phosphatidylinositol binding)	NA
aly-miR160a-5p_R-1_1ss20CT	RrubChr10G00242270.1	RrubChr10G00242270	probable RNA-dependent RNA polymerase 1 [Sesamum indicum]	GO:0003676(nucleic acid binding);GO:0003723(RNA binding);GO:0003968(RNA-directed 5'-3' RNA polymerase activity);GO:0005634(nucleus);GO:0006952(defense response);GO:0009615(response to virus);GO:0009751(response to salicylic acid);GO:0010025(wax biosynthetic process);GO:0016441(posttranscriptional gene silencing);GO:0030422(production of siRNA involved in RNA interference);GO:0060148(positive regu…	NA
aly-miR160a-5p_R-1_1ss20CT	RrubChr10G00242290.1	RrubChr10G00242290	probable RNA-dependent RNA polymerase 1 [Sesamum indicum]	GO:0003676(nucleic acid binding);GO:0003723(RNA binding);GO:0003968(RNA-directed 5'-3' RNA polymerase activity);GO:0005634(nucleus);GO:0006952(defense response);GO:0009615(response to virus);GO:0009751(response to salicylic acid);GO:0010025(wax biosynthetic process);GO:0016441(posttranscriptional gene silencing);GO:0030422(production of siRNA involved in RNA interference);GO:0060148(positive regu…	NA
aly-miR160a-5p_R-1_1ss20CT	RrubChr11G00262500.1	RrubChr11G00262500	auxin response factor ARF1 [Salvia miltiorrhiza]	GO:0003677(DNA binding);GO:0003700(DNA binding transcription factor activity);GO:0005634(nucleus);GO:0006351(transcription, DNA-templated);GO:0006355(regulation of transcription, DNA-templated);GO:0007389(pattern specification process);GO:0009734(auxin-activated signaling pathway);GO:0009738(abscisic acid-activated signaling pathway);GO:0009743(response to carbohydrate);GO:0010154(fruit developme…	ko04075(Plant hormone signal transduction)
aly-miR160a-5p_R-1_1ss20CT	RrubChr11G00278090.1	RrubChr11G00278090	K+-channel ERG [Handroanthus impetiginosus]	GO:0005249(voltage-gated potassium channel activity);GO:0005887(integral component of plasma membrane);GO:0042391(regulation of membrane potential)	ko04626(Plant-pathogen interaction)
aly-miR160a-5p_R-1_1ss20CT	RrubChr1G00004530.1	RrubChr1G00004530	phospho-2-dehydro-3-deoxyheptonate aldolase 2, chloroplastic [Sesamum indicum]	GO:0003849(3-deoxy-7-phosphoheptulonate synthase activity);GO:0005515(protein binding);GO:0005739(mitochondrion);GO:0009073(aromatic amino acid family biosynthetic process);GO:0009423(chorismate biosynthetic process);GO:0009507(chloroplast);GO:0009611(response to wounding);GO:0009617(response to bacterium)	ko00400(Phenylalanine, tyrosine and tryptophan biosynthesis)
aly-miR160a-5p_R-1_1ss20CT	RrubChr1G00008700.1	RrubChr1G00008700	auxin response factor ARF15 [Salvia miltiorrhiza]	GO:0003677(DNA binding);GO:0003700(DNA binding transcription factor activity);GO:0005515(protein binding);GO:0005634(nucleus);GO:0006351(transcription, DNA-templated);GO:0006355(regulation of transcription, DNA-templated);GO:0007389(pattern specification process);GO:0009733(response to auxin);GO:0009734(auxin-activated signaling pathway);GO:0035198(miRNA binding);GO:0048829(root cap development);…	ko04075(Plant hormone signal transduction)
aly-miR160a-5p_R-1_1ss20CT	RrubChr2G00048180.1	RrubChr2G00048180	auxin response factor ARF13 [Salvia miltiorrhiza]	GO:0003677(DNA binding);GO:0003700(DNA binding transcription factor activity);GO:0005515(protein binding);GO:0005634(nucleus);GO:0006351(transcription, DNA-templated);GO:0006355(regulation of transcription, DNA-templated);GO:0007389(pattern specification process);GO:0009733(response to auxin);GO:0009734(auxin-activated signaling pathway);GO:0035198(miRNA binding);GO:0048829(root cap development);…	ko04075(Plant hormone signal transduction)
aly-miR160a-5p_R-1_1ss20CT	RrubChr2G00051050.1	RrubChr2G00051050	auxin response factor ARF14 [Salvia miltiorrhiza]	GO:0003677(DNA binding);GO:0003700(DNA binding transcription factor activity);GO:0005515(protein binding);GO:0005634(nucleus);GO:0006351(transcription, DNA-templated);GO:0006355(regulation of transcription, DNA-templated);GO:0007389(pattern specification process);GO:0009733(response to auxin);GO:0009734(auxin-activated signaling pathway);GO:0035198(miRNA binding);GO:0048829(root cap development);…	ko04075(Plant hormone signal transduction)
aly-miR160a-5p_R-1_1ss20CT	RrubChr2G00055690.1	RrubChr2G00055690	uncharacterized protein LOC105174503 [Sesamum indicum]	GO:0005576(extracellular region);GO:0006869(lipid transport);GO:0008289(lipid binding)	NA
aly-miR160a-5p_R-1_1ss20CT	RrubChr3G00059130.1	RrubChr3G00059130	auxin response factor ARF16 [Salvia miltiorrhiza]	GO:0003677(DNA binding);GO:0003700(DNA binding transcription factor activity);GO:0005515(protein binding);GO:0005634(nucleus);GO:0006351(transcription, DNA-templated);GO:0006355(regulation of transcription, DNA-templated);GO:0007389(pattern specification process);GO:0009733(response to auxin);GO:0009734(auxin-activated signaling pathway);GO:0035198(miRNA binding);GO:0048829(root cap development);…	ko04075(Plant hormone signal transduction)
aly-miR160a-5p_R-1_1ss20CT	RrubChr3G00062140.1	RrubChr3G00062140	sugar carrier protein C [Sesamum indicum]	GO:0005351(carbohydrate:proton symporter activity);GO:0005355(glucose transmembrane transporter activity);GO:0005887(integral component of plasma membrane);GO:0046323(glucose import)	NA
aly-miR160a-5p_R-1_1ss20CT	RrubChr4G00102840.1	RrubChr4G00102840	PREDICTED: metal-nicotianamine transporter YSL1 isoform X2 [Erythranthe guttata]	GO:0003006(developmental process involved in reproduction);GO:0005737(cytoplasm);GO:0005886(plasma membrane);GO:0006811(ion transport);GO:0006857(oligopeptide transport);GO:0009624(response to nematode);GO:0010039(response to iron ion);GO:0016021(integral component of membrane);GO:0048316(seed development);GO:0051980(iron-nicotianamine transmembrane transporter activity);GO:0055072(iron ion homeo…	NA
aly-miR160a-5p_R-1_1ss20CT	RrubChr7G00168340.1	RrubChr7G00168340	PREDICTED: major allergen Pru ar 1-like [Erythranthe guttata]	GO:0004864(protein phosphatase inhibitor activity);GO:0005634(nucleus);GO:0005737(cytoplasm);GO:0009738(abscisic acid-activated signaling pathway);GO:0010427(abscisic acid binding);GO:0080163(regulation of protein serine/threonine phosphatase activity)	NA
aly-miR160a-5p_R-1_1ss20CT	RrubChr7G00168360.1	RrubChr7G00168360	major allergen Pru av 1-like [Sesamum indicum]	GO:0004864(protein phosphatase inhibitor activity);GO:0005634(nucleus);GO:0005737(cytoplasm);GO:0009738(abscisic acid-activated signaling pathway);GO:0010427(abscisic acid binding);GO:0080163(regulation of protein serine/threonine phosphatase activity)	NA
aly-miR160a-5p_R-1_1ss20CT	RrubChr7G00173570.1	RrubChr7G00173570	putative ion channel POLLUX-like 2 isoform X2 [Sesamum indicum]	GO:0005634(nucleus);GO:0006813(potassium ion transport);GO:0008324(cation transmembrane transporter activity);GO:0009507(chloroplast);GO:0009941(chloroplast envelope);GO:0016021(integral component of membrane)	NA
aly-miR160a-5p_R-1_1ss20CT	RrubChr8G00191730.1	RrubChr8G00191730	36.4 kDa proline-rich protein isoform X1 [Prunus persica]	GO:0005575(cellular_component)	NA
aly-miR160a-5p_R-1_1ss20CT	RrubChr8G00203910.1	RrubChr8G00203910	uncharacterized protein At4g26450 [Sesamum indicum]	GO:0005634(nucleus)	NA
aly-miR160a-5p_R-1_1ss20CT	RrubChr9G00215210.1	RrubChr9G00215210	Exocyst component protein [Handroanthus impetiginosus]	GO:0000145(exocyst);GO:0005515(protein binding);GO:0005737(cytoplasm);GO:0005829(cytosol);GO:0005886(plasma membrane);GO:0006887(exocytosis);GO:0006904(vesicle docking involved in exocytosis);GO:0009414(response to water deprivation);GO:0009789(positive regulation of abscisic acid-activated signaling pathway);GO:0012505(endomembrane system);GO:0042742(defense response to bacterium);GO:0045335(pha…	NA
aly-miR160a-5p_R-1_1ss20CT	RrubChr9G00222130.1	RrubChr9G00222130	oligopeptide transporter 4 [Sesamum indicum]	GO:0005887(integral component of plasma membrane);GO:0006857(oligopeptide transport);GO:0015031(protein transport);GO:0016020(membrane);GO:0035673(oligopeptide transmembrane transporter activity);GO:0080167(response to karrikin)	NA
aly-miR160a-5p_R-1_1ss20CT	RrubChr11G00273710.1	RrubChr11G00273710	homeobox protein knotted-1-like LET12 isoform X1 [Sesamum indicum]	GO:0003677(DNA binding);GO:0003700(DNA binding transcription factor activity);GO:0005634(nucleus);GO:0005737(cytoplasm);GO:0005829(cytosol);GO:0006355(regulation of transcription, DNA-templated);GO:0009416(response to light stimulus)	NA
aly-miR160a-5p_R-1_1ss20CT	RrubChr1G00005580.1	RrubChr1G00005580	mRNA splicing factor [Handroanthus impetiginosus]	GO:0000350(generation of catalytic spliceosome for second transesterification step);GO:0000384(first spliceosomal transesterification activity);GO:0000389(mRNA 3'-splice site recognition);GO:0000974(Prp19 complex);GO:0071012(catalytic step 1 spliceosome);GO:0071013(catalytic step 2 spliceosome);GO:0071014(post-mRNA release spliceosomal complex);GO:0071020(post-spliceosomal complex)	ko03040(Spliceosome)
aly-miR160a-5p_R-1_1ss20CT	RrubChr2G00030500.1	RrubChr2G00030500	PREDICTED: macrophage migration inhibitory factor homolog isoform X2 [Erythranthe guttata]	GO:0003674(molecular_function);GO:0006954(inflammatory response);GO:0009507(chloroplast);GO:0051707(response to other organism)	ko00350(Tyrosine metabolism);ko00360(Phenylalanine metabolism)
aly-miR167a-5p_R+1_2ss19CT21AT	RrubChr11G00274770.1	RrubChr11G00274770	hypothetical protein CDL12_14827 [Handroanthus impetiginosus]	GO:0003700(DNA binding transcription factor activity);GO:0005515(protein binding);GO:0005634(nucleus);GO:0006351(transcription, DNA-templated);GO:0006355(regulation of transcription, DNA-templated);GO:0009733(response to auxin);GO:0009734(auxin-activated signaling pathway);GO:0009908(flower development);GO:0043565(sequence-specific DNA binding)	ko04075(Plant hormone signal transduction)
aly-miR167a-5p_R+1_2ss19CT21AT	RrubChr12G00291700.1	RrubChr12G00291700	Leucine-rich acidic nuclear protein [Handroanthus impetiginosus]	GO:0005634(nucleus);GO:0008150(biological_process)	NA
aly-miR167a-5p_R+1_2ss19CT21AT	RrubChr12G00293190.1	RrubChr12G00293190	hypothetical protein CDL12_06927 [Handroanthus impetiginosus]	GO:0003677(DNA binding);GO:0003700(DNA binding transcription factor activity);GO:0005515(protein binding);GO:0005634(nucleus);GO:0006351(transcription, DNA-templated);GO:0006355(regulation of transcription, DNA-templated);GO:0009733(response to auxin);GO:0009734(auxin-activated signaling pathway);GO:0009908(flower development)	ko04075(Plant hormone signal transduction)
aly-miR167a-5p_R+1_2ss19CT21AT	RrubChr1G00001030.1	RrubChr1G00001030	uncharacterized protein At1g04910-like [Sesamum indicum]	GO:0005794(Golgi apparatus);GO:0006004(fucose metabolic process);GO:0006486(protein glycosylation);GO:0016021(integral component of membrane);GO:0016757(transferase activity, transferring glycosyl groups)	NA
aly-miR167a-5p_R+1_2ss19CT21AT	RrubChr1G00001740.1	RrubChr1G00001740	auxin response factor 6 isoform X1 [Sesamum indicum]	GO:0003677(DNA binding);GO:0003700(DNA binding transcription factor activity);GO:0005515(protein binding);GO:0005634(nucleus);GO:0006351(transcription, DNA-templated);GO:0006355(regulation of transcription, DNA-templated);GO:0009733(response to auxin);GO:0009734(auxin-activated signaling pathway);GO:0009908(flower development)	ko04075(Plant hormone signal transduction)
aly-miR167a-5p_R+1_2ss19CT21AT	RrubChr1G00006310.1	RrubChr1G00006310	hypothetical protein CDL12_14827 [Handroanthus impetiginosus]	GO:0003700(DNA binding transcription factor activity);GO:0005515(protein binding);GO:0005634(nucleus);GO:0006351(transcription, DNA-templated);GO:0006355(regulation of transcription, DNA-templated);GO:0009733(response to auxin);GO:0009734(auxin-activated signaling pathway);GO:0009908(flower development);GO:0043565(sequence-specific DNA binding)	ko04075(Plant hormone signal transduction)
aly-miR167a-5p_R+1_2ss19CT21AT	RrubChr2G00032540.1	RrubChr2G00032540	PREDICTED: nudix hydrolase 17, mitochondrial-like [Erythranthe guttata]	GO:0005634(nucleus);GO:0005737(cytoplasm);GO:0005739(mitochondrion);GO:0016787(hydrolase activity);GO:0016818(hydrolase activity, acting on acid anhydrides, in phosphorus-containing anhydrides);GO:0046872(metal ion binding)	NA
aly-miR167a-5p_R+1_2ss19CT21AT	RrubChr2G00045500.1	RrubChr2G00045500	hypothetical protein CDL12_00195 [Handroanthus impetiginosus]	NA	NA
aly-miR167a-5p_R+1_2ss19CT21AT	RrubChr8G00191280.1	RrubChr8G00191280	hypothetical protein CDL12_09885 [Handroanthus impetiginosus]	GO:0003677(DNA binding);GO:0003700(DNA binding transcription factor activity);GO:0005515(protein binding);GO:0005634(nucleus);GO:0006351(transcription, DNA-templated);GO:0006355(regulation of transcription, DNA-templated);GO:0009733(response to auxin);GO:0009734(auxin-activated signaling pathway);GO:0009908(flower development)	ko04075(Plant hormone signal transduction)
aly-miR167a-5p_R+1_2ss19CT21AT	RrubChr2G00038380.1	RrubChr2G00038380	26S protease regulatory subunit 8 homolog A [Sesamum indicum]	GO:0008540(proteasome regulatory particle, base subcomplex);GO:0017025(TBP-class protein binding);GO:0030433(ubiquitin-dependent ERAD pathway);GO:0031595(nuclear proteasome complex);GO:0031597(cytosolic proteasome complex);GO:0036402(proteasome-activating ATPase activity);GO:0045899(positive regulation of RNA polymerase II transcriptional preinitiation complex assembly)	ko03050(Proteasome)
aly-miR167a-5p_R+1_2ss19CT21AT	RrubChr4G00093980.1	RrubChr4G00093980	thylakoid lumenal 29 kDa protein, chloroplastic [Sesamum indicum]	GO:0000302(response to reactive oxygen species);GO:0004130(cytochrome-c peroxidase activity);GO:0004601(peroxidase activity);GO:0005515(protein binding);GO:0005634(nucleus);GO:0005737(cytoplasm);GO:0006979(response to oxidative stress);GO:0009507(chloroplast);GO:0009534(chloroplast thylakoid);GO:0009535(chloroplast thylakoid membrane);GO:0009543(chloroplast thylakoid lumen);GO:0009579(thylakoid);…	ko00053(Ascorbate and aldarate metabolism);ko00480(Glutathione metabolism)
aly-miR167a-5p_R+1_2ss19CT21AT	RrubChr7G00180400.1	RrubChr7G00180400	PREDICTED: 3-dehydroquinate synthase, chloroplastic [Erythranthe guttata]	GO:0003856(3-dehydroquinate synthase activity);GO:0005737(cytoplasm);GO:0009073(aromatic amino acid family biosynthetic process);GO:0009423(chorismate biosynthetic process);GO:0033587(shikimate biosynthetic process)	ko00400(Phenylalanine, tyrosine and tryptophan biosynthesis)
aly-miR169h-3p_L+1_1ss5AG	RrubChr10G00242290.1	RrubChr10G00242290	probable RNA-dependent RNA polymerase 1 [Sesamum indicum]	GO:0003676(nucleic acid binding);GO:0003723(RNA binding);GO:0003968(RNA-directed 5'-3' RNA polymerase activity);GO:0005634(nucleus);GO:0006952(defense response);GO:0009615(response to virus);GO:0009751(response to salicylic acid);GO:0010025(wax biosynthetic process);GO:0016441(posttranscriptional gene silencing);GO:0030422(production of siRNA involved in RNA interference);GO:0060148(positive regu…	NA
aly-miR169h-3p_L+1_1ss5AG	RrubChr10G00256880.1	RrubChr10G00256880	Phenylalanyl-tRNA synthetase beta subunit [Handroanthus impetiginosus]	GO:0004826(phenylalanine-tRNA ligase activity);GO:0006432(phenylalanyl-tRNA aminoacylation);GO:0009328(phenylalanine-tRNA ligase complex)	ko00970(Aminoacyl-tRNA biosynthesis)
aly-miR169h-3p_L+1_1ss5AG	RrubChr11G00260780.1	RrubChr11G00260780	hypothetical protein CDL12_11800 [Handroanthus impetiginosus]	GO:0005737(cytoplasm)	NA
aly-miR169h-3p_L+1_1ss5AG	RrubChr12G00287780.1	RrubChr12G00287780	AAA+-type ATPase [Handroanthus impetiginosus]	GO:0002237(response to molecule of bacterial origin);GO:0005524(ATP binding);GO:0005739(mitochondrion);GO:0005740(mitochondrial envelope);GO:0005741(mitochondrial outer membrane);GO:0005886(plasma membrane);GO:0008219(cell death);GO:0009411(response to UV);GO:0009617(response to bacterium);GO:0009626(plant-type hypersensitive response);GO:0009863(salicylic acid mediated signaling pathway);GO:0016…	NA
aly-miR169h-3p_L+1_1ss5AG	RrubChr12G00289700.1	RrubChr12G00289700	phosphatidylinositol 3,4,5-trisphosphate 3-phosphatase and protein-tyrosine-phosphatase PTEN2A isoform X1 [Sesamum indicum]	GO:0004725(protein tyrosine phosphatase activity);GO:0005829(cytosol);GO:0006970(response to osmotic stress);GO:0008138(protein tyrosine/serine/threonine phosphatase activity);GO:0009651(response to salt stress);GO:0016314(phosphatidylinositol-3,4,5-trisphosphate 3-phosphatase activity);GO:0035335(peptidyl-tyrosine dephosphorylation);GO:0046856(phosphatidylinositol dephosphorylation);GO:0052866(p…	ko00562(Inositol phosphate metabolism);ko04070(Phosphatidylinositol signaling system)
aly-miR169h-3p_L+1_1ss5AG	RrubChr12G00297960.1	RrubChr12G00297960	probable ribose-5-phosphate isomerase 3, chloroplastic [Sesamum indicum]	GO:0004751(ribose-5-phosphate isomerase activity);GO:0009052(pentose-phosphate shunt, non-oxidative branch);GO:0009507(chloroplast);GO:0009535(chloroplast thylakoid membrane);GO:0009570(chloroplast stroma);GO:0009579(thylakoid);GO:0009735(response to cytokinin);GO:0009941(chloroplast envelope);GO:0019253(reductive pentose-phosphate cycle);GO:0042742(defense response to bacterium)	ko00030(Pentose phosphate pathway);ko00710(Carbon fixation in photosynthetic organisms)
aly-miR169h-3p_L+1_1ss5AG	RrubChr1G00007990.1	RrubChr1G00007990	respiratory burst oxidase homolog protein C-like isoform X1 [Olea europaea var. sylvestris]	GO:0004601(peroxidase activity);GO:0005509(calcium ion binding);GO:0005634(nucleus);GO:0005887(integral component of plasma membrane);GO:0006952(defense response);GO:0009060(aerobic respiration);GO:0010053(root epidermal cell differentiation);GO:0016174(NAD(P)H oxidase activity);GO:0033198(response to ATP)	ko04016(MAPK signaling pathway - plant);ko04626(Plant-pathogen interaction)
aly-miR169h-3p_L+1_1ss5AG	RrubChr4G00103560.1	RrubChr4G00103560	PREDICTED: glycerol-3-phosphate acyltransferase, chloroplastic [Erythranthe guttata]	GO:0004366(glycerol-3-phosphate O-acyltransferase activity);GO:0006655(phosphatidylglycerol biosynthetic process);GO:0009507(chloroplast);GO:0009536(plastid);GO:0009570(chloroplast stroma);GO:0016024(CDP-diacylglycerol biosynthetic process);GO:0102420(sn-1-glycerol-3-phosphate C16:0-DCA-CoA acyl transferase activity)	ko00561(Glycerolipid metabolism);ko00564(Glycerophospholipid metabolism)
aly-miR169h-3p_L+1_1ss5AG	RrubChr5G00126590.1	RrubChr5G00126590	putative LOV domain-containing protein [Melissa officinalis]	GO:0004842(ubiquitin-protein transferase activity);GO:0005515(protein binding);GO:0005634(nucleus);GO:0005737(cytoplasm);GO:0005829(cytosol);GO:0006511(ubiquitin-dependent protein catabolic process);GO:0007623(circadian rhythm);GO:0009881(photoreceptor activity);GO:0009882(blue light photoreceptor activity);GO:0009908(flower development);GO:0010114(response to red light);GO:0010498(proteasomal pr…	ko04712(Circadian rhythm - plant)
aly-miR169h-3p_L+1_1ss5AG	RrubChr6G00140600.1	RrubChr6G00140600	Elongation factor-type GTP-binding protein [Handroanthus impetiginosus]	GO:0003924(GTPase activity);GO:0005622(intracellular);GO:0006412(translation)	NA
aly-miR169h-3p_L+1_1ss5AG	RrubChr6G00161940.1	RrubChr6G00161940	PREDICTED: pyruvate dehydrogenase E1 component subunit alpha-3, chloroplastic [Erythranthe guttata]	GO:0004739(pyruvate dehydrogenase (acetyl-transferring) activity);GO:0005739(mitochondrion);GO:0005829(cytosol);GO:0006086(acetyl-CoA biosynthetic process from pyruvate);GO:0006096(glycolytic process);GO:0009507(chloroplast);GO:0009536(plastid);GO:0009570(chloroplast stroma);GO:0009941(chloroplast envelope);GO:0055114(oxidation-reduction process)	ko00010(Glycolysis / Gluconeogenesis);ko00020(Citrate cycle (TCA cycle));ko00620(Pyruvate metabolism)
aly-miR169h-3p_L+1_1ss5AG	RrubChr8G00207260.1	RrubChr8G00207260	GLABROUS1 enhancer-binding protein-like [Sesamum indicum]	GO:0005634(nucleus);GO:0005730(nucleolus);GO:0005829(cytosol);GO:0006351(transcription, DNA-templated);GO:0006355(regulation of transcription, DNA-templated);GO:0009507(chloroplast);GO:0019760(glucosinolate metabolic process);GO:0043565(sequence-specific DNA binding);GO:0044212(transcription regulatory region DNA binding)	NA
aly-miR169h-3p_L+1_1ss5AG	RrubChr8G00210490.1	RrubChr8G00210490	ATP-dependent Clp protease ATP-binding subunit ClpA homolog CD4B, chloroplastic [Olea europaea var. sylvestris]	GO:0004176(ATP-dependent peptidase activity);GO:0005515(protein binding);GO:0005524(ATP binding);GO:0005618(cell wall);GO:0005739(mitochondrion);GO:0005829(cytosol);GO:0009507(chloroplast);GO:0009532(plastid stroma);GO:0009535(chloroplast thylakoid membrane);GO:0009536(plastid);GO:0009570(chloroplast stroma);GO:0009658(chloroplast organization);GO:0009706(chloroplast inner membrane);GO:0009735(re…	NA
aly-miR169h-3p_L+1_1ss5AG	RrubChr9G00233650.1	RrubChr9G00233650	eukaryotic initiation factor 4A-14 [Coffea arabica]	GO:0004004(ATP-dependent RNA helicase activity);GO:0006413(translational initiation);GO:0010468(regulation of gene expression);GO:0010501(RNA secondary structure unwinding)	ko03013(RNA transport)
aly-miR169h-3p_L+1_1ss5AG	RrubChr9G00234890.1	RrubChr9G00234890	hydroxyproline O-arabinosyltransferase 1 [Sesamum indicum]	GO:0005768(endosome);GO:0005774(vacuolar membrane);GO:0005794(Golgi apparatus);GO:0005801(cis-Golgi network);GO:0005802(trans-Golgi network);GO:0005886(plasma membrane);GO:0008150(biological_process);GO:0016020(membrane);GO:0016021(integral component of membrane);GO:0016757(transferase activity, transferring glycosyl groups);GO:1990585(hydroxyproline O-arabinosyltransferase activity)	ko00514(Other types of O-glycan biosynthesis)
aly-miR169h-3p_L+1_1ss5AG	RrubChr10G00245000.1	RrubChr10G00245000	linoleate 13S-lipoxygenase 2-1, chloroplastic-like [Sesamum indicum]	GO:0016165(linoleate 13S-lipoxygenase activity)	ko00591(Linoleic acid metabolism);ko00592(alpha-Linolenic acid metabolism)
aly-miR169h-3p_L+1_1ss5AG	RrubChr10G00257940.1	RrubChr10G00257940	histone H1-like [Sesamum indicum]	GO:0000786(nucleosome);GO:0003677(DNA binding);GO:0005634(nucleus);GO:0005730(nucleolus);GO:0005739(mitochondrion);GO:0006334(nucleosome assembly)	NA
aly-miR169h-3p_L+1_1ss5AG	RrubChr11G00262580.1	RrubChr11G00262580	60S ribosomal protein L12 [Olea europaea var. sylvestris]	GO:0000027(ribosomal large subunit assembly);GO:0003735(structural constituent of ribosome);GO:0006412(translation);GO:0019843(rRNA binding);GO:0022625(cytosolic large ribosomal subunit)	ko03010(Ribosome)
aly-miR169h-3p_L+1_1ss5AG	RrubChr1G00002130.1	RrubChr1G00002130	hypothetical protein CDL12_20104 [Handroanthus impetiginosus]	GO:0003677(DNA binding);GO:0003700(DNA binding transcription factor activity);GO:0005515(protein binding);GO:0005634(nucleus);GO:0006351(transcription, DNA-templated);GO:0006355(regulation of transcription, DNA-templated);GO:0016602(CCAAT-binding factor complex);GO:0045892(negative regulation of transcription, DNA-templated)	NA
aly-miR169h-3p_L+1_1ss5AG	RrubChr1G00006130.1	RrubChr1G00006130	Acyl-CoA synthetase [Handroanthus impetiginosus]	GO:0005739(mitochondrion);GO:0005777(peroxisome);GO:0019605(butyrate metabolic process);GO:0047760(butyrate-CoA ligase activity)	NA
aly-miR169h-3p_L+1_1ss5AG	RrubChr4G00088910.1	RrubChr4G00088910	nitrate reductase [NADH] 2 [Sesamum indicum]	GO:0005739(mitochondrion);GO:0005773(vacuole);GO:0005829(cytosol);GO:0005886(plasma membrane);GO:0006809(nitric oxide biosynthetic process);GO:0008940(nitrate reductase activity);GO:0009416(response to light stimulus);GO:0009610(response to symbiotic fungus);GO:0009635(response to herbicide);GO:0009703(nitrate reductase (NADH) activity);GO:0020037(heme binding);GO:0030151(molybdenum ion binding);…	ko00910(Nitrogen metabolism)
aly-miR169h-3p_L+1_1ss5AG	RrubChr6G00143260.1	RrubChr6G00143260	hypothetical protein CDL12_04448 [Handroanthus impetiginosus]	GO:0003677(DNA binding);GO:0005634(nucleus);GO:0006351(transcription, DNA-templated);GO:0006355(regulation of transcription, DNA-templated)	NA
aly-miR171b-3p_R+1	RrubChr6G00144710.1	RrubChr6G00144710	hypothetical protein CDL12_17752 [Handroanthus impetiginosus]	GO:0003700(DNA binding transcription factor activity);GO:0005634(nucleus);GO:0006355(regulation of transcription, DNA-templated);GO:0010492(maintenance of shoot apical meristem identity);GO:0043565(sequence-specific DNA binding);GO:0048768(root hair cell tip growth);GO:0051301(cell division)	ko04075(Plant hormone signal transduction)
aly-miR172a-5p_1ss3GA	RrubChr11G00273020.1	RrubChr11G00273020	Splicing factor-like protein [Parasponia andersonii]	GO:0003676(nucleic acid binding);GO:0003723(RNA binding);GO:0005681(spliceosomal complex);GO:0006397(mRNA processing);GO:0008380(RNA splicing);GO:0009644(response to high light intensity);GO:0016021(integral component of membrane);GO:0016607(nuclear speck);GO:0043484(regulation of RNA splicing)	ko03040(Spliceosome)
aly-miR172a-5p_1ss3GA	RrubChr11G00276230.1	RrubChr11G00276230	profilin-3-like [Sesamum indicum]	GO:0003785(actin monomer binding);GO:0005938(cell cortex);GO:0015629(actin cytoskeleton);GO:0042989(sequestering of actin monomers)	NA
aly-miR172a-5p_1ss3GA	RrubChr12G00284870.1	RrubChr12G00284870	scarecrow-like protein 21 isoform X1 [Sesamum indicum]	GO:0003700(DNA binding transcription factor activity);GO:0005634(nucleus);GO:0006355(regulation of transcription, DNA-templated);GO:0043565(sequence-specific DNA binding)	ko04075(Plant hormone signal transduction)
aly-miR172a-5p_1ss3GA	RrubChr12G00285170.1	RrubChr12G00285170	glutamate--tRNA ligase, chloroplastic/mitochondrial [Sesamum indicum]	GO:0003723(RNA binding);GO:0004818(glutamate-tRNA ligase activity);GO:0005739(mitochondrion);GO:0006424(glutamyl-tRNA aminoacylation);GO:0009570(chloroplast stroma);GO:0070127(tRNA aminoacylation for mitochondrial protein translation)	ko00860(Porphyrin and chlorophyll metabolism);ko00970(Aminoacyl-tRNA biosynthesis)
aly-miR172a-5p_1ss3GA	RrubChr12G00290020.1	RrubChr12G00290020	hypothetical protein CDL12_21536 [Handroanthus impetiginosus]	GO:0003674(molecular_function);GO:0005575(cellular_component);GO:0008150(biological_process)	NA
aly-miR172a-5p_1ss3GA	RrubChr12G00297340.1	RrubChr12G00297340	heat shock cognate protein 80 [Sesamum indicum]	GO:0005515(protein binding);GO:0005524(ATP binding);GO:0005730(nucleolus);GO:0005737(cytoplasm);GO:0005794(Golgi apparatus);GO:0005829(cytosol);GO:0005886(plasma membrane);GO:0006457(protein folding);GO:0009408(response to heat);GO:0016020(membrane);GO:0045087(innate immune response);GO:0051082(unfolded protein binding);GO:0051131(chaperone-mediated protein complex assembly);GO:0071277(cellular r…	ko04141(Protein processing in endoplasmic reticulum);ko04626(Plant-pathogen interaction)
aly-miR172a-5p_1ss3GA	RrubChr3G00062260.1	RrubChr3G00062260	ATP-dependent zinc metalloprotease FTSH 2, chloroplastic [Sesamum indicum]	GO:0004176(ATP-dependent peptidase activity);GO:0005739(mitochondrion);GO:0006508(proteolysis);GO:0008237(metallopeptidase activity);GO:0009535(chloroplast thylakoid membrane);GO:0009941(chloroplast envelope);GO:0010027(thylakoid membrane organization);GO:0010205(photoinhibition);GO:0010206(photosystem II repair);GO:0010304(PSII associated light-harvesting complex II catabolic process)	NA
aly-miR172a-5p_1ss3GA	RrubChr3G00072850.1	RrubChr3G00072850	peptidyl-prolyl cis-trans isomerase NIMA-interacting 4-like [Dorcoceras hygrometricum]	GO:0003755(peptidyl-prolyl cis-trans isomerase activity);GO:0005575(cellular_component);GO:0016853(isomerase activity)	NA
aly-miR172a-5p_1ss3GA	RrubChr4G00091030.1	RrubChr4G00091030	Cellulose synthase (GDP-forming) [Handroanthus impetiginosus]	GO:0000977(RNA polymerase II regulatory region sequence-specific DNA binding);GO:0005515(protein binding);GO:0005794(Golgi apparatus);GO:0005886(plasma membrane);GO:0005887(integral component of plasma membrane);GO:0009825(multidimensional cell growth);GO:0009832(plant-type cell wall biogenesis);GO:0009833(plant-type primary cell wall biogenesis);GO:0010330(cellulose synthase complex);GO:0016020(…	NA
aly-miR172a-5p_1ss3GA	RrubChr6G00143520.1	RrubChr6G00143520	K(+) efflux antiporter 2, chloroplastic [Sesamum indicum]	GO:0009507(chloroplast);GO:0009658(chloroplast organization);GO:0009941(chloroplast envelope);GO:0010109(regulation of photosynthesis);GO:0015079(potassium ion transmembrane transporter activity);GO:0015386(potassium:proton antiporter activity);GO:0016020(membrane);GO:0016021(integral component of membrane);GO:0031969(chloroplast membrane)	NA
aly-miR172a-5p_1ss3GA	RrubChr6G00147120.1	RrubChr6G00147120	pentatricopeptide repeat-containing protein At5g10690 [Sesamum indicum]	GO:0005739(mitochondrion);GO:0005829(cytosol);GO:0008150(biological_process)	NA
aly-miR172a-5p_1ss3GA	RrubChr7G00167790.1	RrubChr7G00167790	ATP-citrate synthase beta chain protein 2 [Sesamum indicum]	GO:0003878(ATP citrate synthase activity);GO:0005524(ATP binding);GO:0005737(cytoplasm);GO:0005829(cytosol);GO:0006085(acetyl-CoA biosynthetic process);GO:0006629(lipid metabolic process);GO:0009346(citrate lyase complex);GO:0016020(membrane);GO:0046872(metal ion binding)	ko00020(Citrate cycle (TCA cycle))
aly-miR172a-5p_1ss3GA	RrubChr8G00211740.1	RrubChr8G00211740	uncharacterized protein At2g33490 isoform X1 [Sesamum indicum]	GO:0003674(molecular_function);GO:0005634(nucleus);GO:0005886(plasma membrane);GO:0008150(biological_process)	NA
aly-miR172a-5p_1ss3GA	RrubChr9G00233700.1	RrubChr9G00233700	protein ANTAGONIST OF LIKE HETEROCHROMATIN PROTEIN 1 [Sesamum indicum]	GO:0005634(nucleus);GO:0005774(vacuolar membrane);GO:0005886(plasma membrane);GO:0009507(chloroplast);GO:0016020(membrane)	NA
aly-miR172a-5p_1ss3GA	RrubChr12G00283930.1	RrubChr12G00283930	ABC transporter B family member 28 isoform X1 [Sesamum indicum]	GO:0016021(integral component of membrane);GO:0042626(ATPase activity, coupled to transmembrane movement of substances);GO:0055085(transmembrane transport)	ko02010(ABC transporters)
aly-miR172a-5p_1ss3GA	RrubChr12G00305020.1	RrubChr12G00305020	protein transport protein SEC31 homolog B [Sesamum indicum]	GO:0003674(molecular_function);GO:0005737(cytoplasm);GO:0005783(endoplasmic reticulum);GO:0005794(Golgi apparatus);GO:0005829(cytosol);GO:0007029(endoplasmic reticulum organization);GO:0009506(plasmodesma);GO:0015031(protein transport);GO:0016020(membrane);GO:0016192(vesicle-mediated transport);GO:0070971(endoplasmic reticulum exit site);GO:0080008(Cul4-RING E3 ubiquitin ligase complex)	ko04141(Protein processing in endoplasmic reticulum)
aly-miR172a-5p_1ss3GA	RrubChr2G00045150.1	RrubChr2G00045150	uncharacterized protein LOC105157288 [Sesamum indicum]	GO:0003674(molecular_function);GO:0005634(nucleus);GO:0008150(biological_process);GO:0009506(plasmodesma)	NA
aly-miR172a-5p_1ss3GA	RrubChr3G00065600.1	RrubChr3G00065600	DNA mismatch repair protein MSH3 [Sesamum indicum]	GO:0000228(nuclear chromosome);GO:0000710(meiotic mismatch repair);GO:0003684(damaged DNA binding);GO:0007131(reciprocal meiotic recombination);GO:0030983(mismatched DNA binding);GO:0032300(mismatch repair complex)	ko03430(Mismatch repair)
aly-miR172a-5p_1ss3GA	RrubChr4G00107700.1	RrubChr4G00107700	hypothetical protein CDL12_15846 [Handroanthus impetiginosus]	NA	ko04626(Plant-pathogen interaction)
aly-miR172a-5p_1ss3GA	RrubChr4G00107860.1	RrubChr4G00107860	Apoptotic ATPase [Handroanthus impetiginosus]	GO:0005524(ATP binding);GO:0006952(defense response);GO:0043531(ADP binding)	ko04626(Plant-pathogen interaction)
aly-miR172a-5p_1ss3GA	RrubChr5G00128230.1	RrubChr5G00128230	Dicer-like protein 4b [Salvia miltiorrhiza]	GO:0003723(RNA binding);GO:0004525(ribonuclease III activity);GO:0005634(nucleus);GO:0005737(cytoplasm);GO:0016442(RISC complex);GO:0030422(production of siRNA involved in RNA interference)	NA
aly-miR172a-5p_1ss3GA	RrubChr8G00211080.1	RrubChr8G00211080	cinnamoyl-CoA reductase [Paulownia sp. ZKC-2008]	GO:0003824(catalytic activity);GO:0005737(cytoplasm);GO:0005829(cytosol);GO:0007623(circadian rhythm);GO:0009409(response to cold);GO:0009809(lignin biosynthetic process);GO:0016621(cinnamoyl-CoA reductase activity);GO:0050662(coenzyme binding);GO:0055114(oxidation-reduction process)	ko00940(Phenylpropanoid biosynthesis)
aly-miR172a-5p_1ss3GA	RrubChr9G00232860.1	RrubChr9G00232860	homeobox-leucine zipper protein ATHB-15 [Sesamum indicum]	GO:0003677(DNA binding);GO:0003700(DNA binding transcription factor activity);GO:0005634(nucleus);GO:0006351(transcription, DNA-templated);GO:0006355(regulation of transcription, DNA-templated);GO:0008284(positive regulation of cell proliferation);GO:0008289(lipid binding);GO:0009733(response to auxin);GO:0010014(meristem initiation);GO:0010067(procambium histogenesis);GO:0010072(primary shoot ap…	NA
aly-miR172a-5p_1ss9AT	RrubChr12G00284870.1	RrubChr12G00284870	scarecrow-like protein 21 isoform X1 [Sesamum indicum]	GO:0003700(DNA binding transcription factor activity);GO:0005634(nucleus);GO:0006355(regulation of transcription, DNA-templated);GO:0043565(sequence-specific DNA binding)	ko04075(Plant hormone signal transduction)
aly-miR172a-5p_1ss9AT	RrubChr12G00290020.1	RrubChr12G00290020	hypothetical protein CDL12_21536 [Handroanthus impetiginosus]	GO:0003674(molecular_function);GO:0005575(cellular_component);GO:0008150(biological_process)	NA
aly-miR172a-5p_1ss9AT	RrubChr2G00048970.1	RrubChr2G00048970	heat shock cognate 70 kDa protein 2-like [Sesamum indicum]	GO:0002020(protease binding);GO:0005515(protein binding);GO:0005524(ATP binding);GO:0005618(cell wall);GO:0005634(nucleus);GO:0005730(nucleolus);GO:0005737(cytoplasm);GO:0005774(vacuolar membrane);GO:0005794(Golgi apparatus);GO:0005829(cytosol);GO:0005886(plasma membrane);GO:0006351(transcription, DNA-templated);GO:0006355(regulation of transcription, DNA-templated);GO:0006457(protein folding);GO…	ko03040(Spliceosome);ko04141(Protein processing in endoplasmic reticulum);ko04144(Endocytosis)
aly-miR172a-5p_1ss9AT	RrubChr3G00075420.1	RrubChr3G00075420	phosphoinositide phosphatase SAC2 [Sesamum indicum]	GO:0004439(phosphatidylinositol-4,5-bisphosphate 5-phosphatase activity);GO:0005634(nucleus);GO:0005774(vacuolar membrane);GO:0007033(vacuole organization);GO:0036092(phosphatidylinositol-3-phosphate biosynthetic process);GO:0042578(phosphoric ester hydrolase activity)	ko00562(Inositol phosphate metabolism);ko04070(Phosphatidylinositol signaling system)
aly-miR172a-5p_1ss9AT	RrubChr6G00141970.1	RrubChr6G00141970	WRKY protein [Salvia miltiorrhiza]	GO:0009737(response to abscisic acid)	ko04626(Plant-pathogen interaction)
aly-miR172a-5p_1ss9AT	RrubChr6G00145790.1	RrubChr6G00145790	PREDICTED: uncharacterized protein LOC105954801 [Erythranthe guttata]	GO:0003924(GTPase activity);GO:0005525(GTP binding);GO:0005634(nucleus)	NA
aly-miR172a-5p_1ss9AT	RrubChr7G00166160.1	RrubChr7G00166160	S-adenosylmethionine synthase 2 isoform X1 [Sesamum indicum]	GO:0004478(methionine adenosyltransferase activity);GO:0005829(cytosol)	ko00270(Cysteine and methionine metabolism)
aly-miR172a-5p_1ss9AT	RrubChr8G00191610.1	RrubChr8G00191610	lignan glucosyltransferase [Sesamum alatum]	GO:0009813(flavonoid biosynthetic process);GO:0043231(intracellular membrane-bounded organelle);GO:0052696(flavonoid glucuronidation);GO:0080043(quercetin 3-O-glucosyltransferase activity);GO:0080044(quercetin 7-O-glucosyltransferase activity)	NA
aly-miR172a-5p_1ss9AT	RrubChr8G00201060.1	RrubChr8G00201060	Histone H2A.1 like [Actinidia chinensis var. chinensis]	GO:0000790(nuclear chromatin);GO:0003677(DNA binding);GO:0006342(chromatin silencing)	NA
aly-miR172a-5p_1ss9AT	RrubChr2G00045960.1	RrubChr2G00045960	calcium-transporting ATPase 10, plasma membrane-type isoform X1 [Sesamum indicum]	GO:0005388(calcium-transporting ATPase activity);GO:0005887(integral component of plasma membrane);GO:0043231(intracellular membrane-bounded organelle)	NA
aly-miR172a-5p_1ss9AT	RrubChr2G00054110.1	RrubChr2G00054110	TATA binding protein associated factor [Handroanthus impetiginosus]	GO:0003682(chromatin binding);GO:0005669(transcription factor TFIID complex);GO:0043565(sequence-specific DNA binding);GO:0044212(transcription regulatory region DNA binding);GO:0045944(positive regulation of transcription by RNA polymerase II)	ko03022(Basal transcription factors)
aly-miR172a-5p_1ss9AT	RrubChr3G00065600.1	RrubChr3G00065600	DNA mismatch repair protein MSH3 [Sesamum indicum]	GO:0000228(nuclear chromosome);GO:0000710(meiotic mismatch repair);GO:0003684(damaged DNA binding);GO:0007131(reciprocal meiotic recombination);GO:0030983(mismatched DNA binding);GO:0032300(mismatch repair complex)	ko03430(Mismatch repair)
aly-miR172a-5p_1ss9AT	RrubChr8G00205040.1	RrubChr8G00205040	probable galacturonosyltransferase 4 [Sesamum indicum]	GO:0000139(Golgi membrane);GO:0005794(Golgi apparatus);GO:0016021(integral component of membrane);GO:0016051(carbohydrate biosynthetic process);GO:0016757(transferase activity, transferring glycosyl groups);GO:0045489(pectin biosynthetic process);GO:0047262(polygalacturonate 4-alpha-galacturonosyltransferase activity);GO:0071555(cell wall organization)	ko00520(Amino sugar and nucleotide sugar metabolism)
aly-miR172b-5p_2ss2CT7CT	RrubChr11G00273020.1	RrubChr11G00273020	Splicing factor-like protein [Parasponia andersonii]	GO:0003676(nucleic acid binding);GO:0003723(RNA binding);GO:0005681(spliceosomal complex);GO:0006397(mRNA processing);GO:0008380(RNA splicing);GO:0009644(response to high light intensity);GO:0016021(integral component of membrane);GO:0016607(nuclear speck);GO:0043484(regulation of RNA splicing)	ko03040(Spliceosome)
aly-miR172b-5p_2ss2CT7CT	RrubChr11G00276230.1	RrubChr11G00276230	profilin-3-like [Sesamum indicum]	GO:0003785(actin monomer binding);GO:0005938(cell cortex);GO:0015629(actin cytoskeleton);GO:0042989(sequestering of actin monomers)	NA
aly-miR172b-5p_2ss2CT7CT	RrubChr12G00284870.1	RrubChr12G00284870	scarecrow-like protein 21 isoform X1 [Sesamum indicum]	GO:0003700(DNA binding transcription factor activity);GO:0005634(nucleus);GO:0006355(regulation of transcription, DNA-templated);GO:0043565(sequence-specific DNA binding)	ko04075(Plant hormone signal transduction)
aly-miR172b-5p_2ss2CT7CT	RrubChr12G00285170.1	RrubChr12G00285170	glutamate--tRNA ligase, chloroplastic/mitochondrial [Sesamum indicum]	GO:0003723(RNA binding);GO:0004818(glutamate-tRNA ligase activity);GO:0005739(mitochondrion);GO:0006424(glutamyl-tRNA aminoacylation);GO:0009570(chloroplast stroma);GO:0070127(tRNA aminoacylation for mitochondrial protein translation)	ko00860(Porphyrin and chlorophyll metabolism);ko00970(Aminoacyl-tRNA biosynthesis)
aly-miR172b-5p_2ss2CT7CT	RrubChr12G00290020.1	RrubChr12G00290020	hypothetical protein CDL12_21536 [Handroanthus impetiginosus]	GO:0003674(molecular_function);GO:0005575(cellular_component);GO:0008150(biological_process)	NA
aly-miR172b-5p_2ss2CT7CT	RrubChr12G00297340.1	RrubChr12G00297340	heat shock cognate protein 80 [Sesamum indicum]	GO:0005515(protein binding);GO:0005524(ATP binding);GO:0005730(nucleolus);GO:0005737(cytoplasm);GO:0005794(Golgi apparatus);GO:0005829(cytosol);GO:0005886(plasma membrane);GO:0006457(protein folding);GO:0009408(response to heat);GO:0016020(membrane);GO:0045087(innate immune response);GO:0051082(unfolded protein binding);GO:0051131(chaperone-mediated protein complex assembly);GO:0071277(cellular r…	ko04141(Protein processing in endoplasmic reticulum);ko04626(Plant-pathogen interaction)
aly-miR172b-5p_2ss2CT7CT	RrubChr3G00062260.1	RrubChr3G00062260	ATP-dependent zinc metalloprotease FTSH 2, chloroplastic [Sesamum indicum]	GO:0004176(ATP-dependent peptidase activity);GO:0005739(mitochondrion);GO:0006508(proteolysis);GO:0008237(metallopeptidase activity);GO:0009535(chloroplast thylakoid membrane);GO:0009941(chloroplast envelope);GO:0010027(thylakoid membrane organization);GO:0010205(photoinhibition);GO:0010206(photosystem II repair);GO:0010304(PSII associated light-harvesting complex II catabolic process)	NA
aly-miR172b-5p_2ss2CT7CT	RrubChr3G00072850.1	RrubChr3G00072850	peptidyl-prolyl cis-trans isomerase NIMA-interacting 4-like [Dorcoceras hygrometricum]	GO:0003755(peptidyl-prolyl cis-trans isomerase activity);GO:0005575(cellular_component);GO:0016853(isomerase activity)	NA
aly-miR172b-5p_2ss2CT7CT	RrubChr4G00091030.1	RrubChr4G00091030	Cellulose synthase (GDP-forming) [Handroanthus impetiginosus]	GO:0000977(RNA polymerase II regulatory region sequence-specific DNA binding);GO:0005515(protein binding);GO:0005794(Golgi apparatus);GO:0005886(plasma membrane);GO:0005887(integral component of plasma membrane);GO:0009825(multidimensional cell growth);GO:0009832(plant-type cell wall biogenesis);GO:0009833(plant-type primary cell wall biogenesis);GO:0010330(cellulose synthase complex);GO:0016020(…	NA
aly-miR172b-5p_2ss2CT7CT	RrubChr6G00143520.1	RrubChr6G00143520	K(+) efflux antiporter 2, chloroplastic [Sesamum indicum]	GO:0009507(chloroplast);GO:0009658(chloroplast organization);GO:0009941(chloroplast envelope);GO:0010109(regulation of photosynthesis);GO:0015079(potassium ion transmembrane transporter activity);GO:0015386(potassium:proton antiporter activity);GO:0016020(membrane);GO:0016021(integral component of membrane);GO:0031969(chloroplast membrane)	NA
aly-miR172b-5p_2ss2CT7CT	RrubChr6G00147120.1	RrubChr6G00147120	pentatricopeptide repeat-containing protein At5g10690 [Sesamum indicum]	GO:0005739(mitochondrion);GO:0005829(cytosol);GO:0008150(biological_process)	NA
aly-miR172b-5p_2ss2CT7CT	RrubChr7G00167790.1	RrubChr7G00167790	ATP-citrate synthase beta chain protein 2 [Sesamum indicum]	GO:0003878(ATP citrate synthase activity);GO:0005524(ATP binding);GO:0005737(cytoplasm);GO:0005829(cytosol);GO:0006085(acetyl-CoA biosynthetic process);GO:0006629(lipid metabolic process);GO:0009346(citrate lyase complex);GO:0016020(membrane);GO:0046872(metal ion binding)	ko00020(Citrate cycle (TCA cycle))
aly-miR172b-5p_2ss2CT7CT	RrubChr8G00211740.1	RrubChr8G00211740	uncharacterized protein At2g33490 isoform X1 [Sesamum indicum]	GO:0003674(molecular_function);GO:0005634(nucleus);GO:0005886(plasma membrane);GO:0008150(biological_process)	NA
aly-miR172b-5p_2ss2CT7CT	RrubChr9G00233700.1	RrubChr9G00233700	protein ANTAGONIST OF LIKE HETEROCHROMATIN PROTEIN 1 [Sesamum indicum]	GO:0005634(nucleus);GO:0005774(vacuolar membrane);GO:0005886(plasma membrane);GO:0009507(chloroplast);GO:0016020(membrane)	NA
aly-miR172b-5p_2ss2CT7CT	RrubChr12G00283930.1	RrubChr12G00283930	ABC transporter B family member 28 isoform X1 [Sesamum indicum]	GO:0016021(integral component of membrane);GO:0042626(ATPase activity, coupled to transmembrane movement of substances);GO:0055085(transmembrane transport)	ko02010(ABC transporters)
aly-miR172b-5p_2ss2CT7CT	RrubChr12G00305020.1	RrubChr12G00305020	protein transport protein SEC31 homolog B [Sesamum indicum]	GO:0003674(molecular_function);GO:0005737(cytoplasm);GO:0005783(endoplasmic reticulum);GO:0005794(Golgi apparatus);GO:0005829(cytosol);GO:0007029(endoplasmic reticulum organization);GO:0009506(plasmodesma);GO:0015031(protein transport);GO:0016020(membrane);GO:0016192(vesicle-mediated transport);GO:0070971(endoplasmic reticulum exit site);GO:0080008(Cul4-RING E3 ubiquitin ligase complex)	ko04141(Protein processing in endoplasmic reticulum)
aly-miR172b-5p_2ss2CT7CT	RrubChr2G00045150.1	RrubChr2G00045150	uncharacterized protein LOC105157288 [Sesamum indicum]	GO:0003674(molecular_function);GO:0005634(nucleus);GO:0008150(biological_process);GO:0009506(plasmodesma)	NA
aly-miR172b-5p_2ss2CT7CT	RrubChr3G00065600.1	RrubChr3G00065600	DNA mismatch repair protein MSH3 [Sesamum indicum]	GO:0000228(nuclear chromosome);GO:0000710(meiotic mismatch repair);GO:0003684(damaged DNA binding);GO:0007131(reciprocal meiotic recombination);GO:0030983(mismatched DNA binding);GO:0032300(mismatch repair complex)	ko03430(Mismatch repair)
aly-miR172b-5p_2ss2CT7CT	RrubChr4G00107700.1	RrubChr4G00107700	hypothetical protein CDL12_15846 [Handroanthus impetiginosus]	NA	ko04626(Plant-pathogen interaction)
aly-miR172b-5p_2ss2CT7CT	RrubChr4G00107860.1	RrubChr4G00107860	Apoptotic ATPase [Handroanthus impetiginosus]	GO:0005524(ATP binding);GO:0006952(defense response);GO:0043531(ADP binding)	ko04626(Plant-pathogen interaction)
aly-miR172b-5p_2ss2CT7CT	RrubChr5G00128230.1	RrubChr5G00128230	Dicer-like protein 4b [Salvia miltiorrhiza]	GO:0003723(RNA binding);GO:0004525(ribonuclease III activity);GO:0005634(nucleus);GO:0005737(cytoplasm);GO:0016442(RISC complex);GO:0030422(production of siRNA involved in RNA interference)	NA
aly-miR172b-5p_2ss2CT7CT	RrubChr8G00211080.1	RrubChr8G00211080	cinnamoyl-CoA reductase [Paulownia sp. ZKC-2008]	GO:0003824(catalytic activity);GO:0005737(cytoplasm);GO:0005829(cytosol);GO:0007623(circadian rhythm);GO:0009409(response to cold);GO:0009809(lignin biosynthetic process);GO:0016621(cinnamoyl-CoA reductase activity);GO:0050662(coenzyme binding);GO:0055114(oxidation-reduction process)	ko00940(Phenylpropanoid biosynthesis)
aly-miR172b-5p_2ss2CT7CT	RrubChr9G00232860.1	RrubChr9G00232860	homeobox-leucine zipper protein ATHB-15 [Sesamum indicum]	GO:0003677(DNA binding);GO:0003700(DNA binding transcription factor activity);GO:0005634(nucleus);GO:0006351(transcription, DNA-templated);GO:0006355(regulation of transcription, DNA-templated);GO:0008284(positive regulation of cell proliferation);GO:0008289(lipid binding);GO:0009733(response to auxin);GO:0010014(meristem initiation);GO:0010067(procambium histogenesis);GO:0010072(primary shoot ap…	NA
aly-MIR2111a-p5_2ss8CG21TG	RrubChr4G00101530.1	RrubChr4G00101530	protein indeterminate-domain 5, chloroplastic-like [Sesamum indicum]	GO:0003676(nucleic acid binding);GO:0003677(DNA binding);GO:0003700(DNA binding transcription factor activity);GO:0005634(nucleus);GO:0006351(transcription, DNA-templated);GO:0006355(regulation of transcription, DNA-templated);GO:0008270(zinc ion binding);GO:0009507(chloroplast);GO:0046872(metal ion binding)	ko00052(Galactose metabolism);ko00600(Sphingolipid metabolism);ko00531(Glycosaminoglycan degradation);ko00604(Glycosphingolipid biosynthesis - ganglio series);ko00511(Other glycan degradation)
aly-miR395c-3p_L-1_1ss17GA	RrubChr10G00246750.1	RrubChr10G00246750	ATP sulfurylase 1, chloroplastic-like [Sesamum indicum]	GO:0000103(sulfate assimilation);GO:0004020(adenylylsulfate kinase activity)	ko00920(Sulfur metabolism);ko00230(Purine metabolism);ko00450(Selenocompound metabolism);ko00261(Monobactam biosynthesis)
aly-miR395c-3p_L-1_1ss17GA	RrubChr11G00264620.1	RrubChr11G00264620	PREDICTED: glyoxylate/succinic semialdehyde reductase 1 isoform X1 [Erythranthe guttata]	GO:0003858(3-hydroxybutyrate dehydrogenase activity);GO:0004616(phosphogluconate dehydrogenase (decarboxylating) activity);GO:0005739(mitochondrion);GO:0005829(cytosol);GO:0006979(response to oxidative stress);GO:0030267(glyoxylate reductase (NADP) activity);GO:0051287(NAD binding);GO:0055114(oxidation-reduction process)	ko00630(Glyoxylate and dicarboxylate metabolism);ko00650(Butanoate metabolism)
aly-miR395c-3p_L-1_1ss17GA	RrubChr12G00304690.1	RrubChr12G00304690	Glutaredoxin [Handroanthus impetiginosus]	GO:0005515(protein binding);GO:0005739(mitochondrion);GO:0009055(electron transfer activity);GO:0015035(protein disulfide oxidoreductase activity);GO:0045454(cell redox homeostasis);GO:0046872(metal ion binding);GO:0051537(2 iron, 2 sulfur cluster binding)	NA
aly-miR395c-3p_L-1_1ss17GA	RrubChr1G00005180.1	RrubChr1G00005180	low affinity sulfate transporter 3 [Sesamum indicum]	GO:0005887(integral component of plasma membrane);GO:0015116(sulfate transmembrane transporter activity)	NA
aly-miR395c-3p_L-1_1ss17GA	RrubChr1G00009660.1	RrubChr1G00009660	arginine biosynthesis bifunctional protein ArgJ, chloroplastic isoform X1 [Sesamum indicum]	GO:0004042(acetyl-CoA:L-glutamate N-acetyltransferase activity);GO:0004358(glutamate N-acetyltransferase activity);GO:0006526(arginine biosynthetic process);GO:0006592(ornithine biosynthetic process)	ko00220(Arginine biosynthesis)
aly-miR395c-3p_L-1_1ss17GA	RrubChr2G00034210.1	RrubChr2G00034210	high mobility group B protein 1 isoform X2 [Sesamum indicum]	GO:0000785(chromatin);GO:0003677(DNA binding);GO:0003682(chromatin binding);GO:0003700(DNA binding transcription factor activity);GO:0005634(nucleus);GO:0005829(cytosol);GO:0006333(chromatin assembly or disassembly);GO:0030527(structural constituent of chromatin)	ko03410(Base excision repair)
aly-miR395c-3p_L-1_1ss17GA	RrubChr2G00048570.1	RrubChr2G00048570	Anaphase-promoting complex (APC), subunit 11 [Handroanthus impetiginosus]	GO:0000209(protein polyubiquitination);GO:0043161(proteasome-mediated ubiquitin-dependent protein catabolic process);GO:0061630(ubiquitin protein ligase activity)	NA
aly-miR395c-3p_L-1_1ss17GA	RrubChr2G00051370.1	RrubChr2G00051370	protein DMR6-LIKE OXYGENASE 1 [Sesamum indicum]	GO:0051213(dioxygenase activity)	ko00941(Flavonoid biosynthesis)
aly-miR395c-3p_L-1_1ss17GA	RrubChr3G00066260.1	RrubChr3G00066260	Zuotin [Handroanthus impetiginosus]	GO:0003677(DNA binding);GO:0003700(DNA binding transcription factor activity);GO:0005634(nucleus);GO:0006351(transcription, DNA-templated);GO:0006355(regulation of transcription, DNA-templated);GO:0009651(response to salt stress);GO:0009723(response to ethylene);GO:0009737(response to abscisic acid);GO:0009739(response to gibberellin);GO:0009751(response to salicylic acid);GO:0009753(response to …	ko04712(Circadian rhythm - plant)
aly-miR395c-3p_L-1_1ss17GA	RrubChr3G00067280.1	RrubChr3G00067280	uroporphyrinogen decarboxylase [Sesamum indicum]	GO:0004853(uroporphyrinogen decarboxylase activity);GO:0005829(cytosol);GO:0006783(heme biosynthetic process)	ko00860(Porphyrin and chlorophyll metabolism)
aly-miR395c-3p_L-1_1ss17GA	RrubChr6G00140840.1	RrubChr6G00140840	protoporphyrin IX magnesium chelatase subunit H [Ocimum basilicum]	GO:0005515(protein binding);GO:0005524(ATP binding);GO:0005739(mitochondrion);GO:0009507(chloroplast);GO:0009570(chloroplast stroma);GO:0009706(chloroplast inner membrane);GO:0010007(magnesium chelatase complex);GO:0015979(photosynthesis);GO:0015995(chlorophyll biosynthetic process);GO:0016851(magnesium chelatase activity)	ko00860(Porphyrin and chlorophyll metabolism)
aly-miR395c-3p_L-1_1ss17GA	RrubChr6G00147840.1	RrubChr6G00147840	Prephenate dehydratase [Handroanthus impetiginosus]	GO:0004664(prephenate dehydratase activity);GO:0009094(L-phenylalanine biosynthetic process);GO:0009507(chloroplast);GO:0009570(chloroplast stroma);GO:0047769(arogenate dehydratase activity)	ko00400(Phenylalanine, tyrosine and tryptophan biosynthesis)
aly-miR395c-3p_L-1_1ss17GA	RrubChr6G00153790.1	RrubChr6G00153790	hypothetical protein CDL12_15470 [Handroanthus impetiginosus]	GO:0003674(molecular_function);GO:0005634(nucleus)	NA
aly-miR395c-3p_L-1_1ss17GA	RrubChr6G00154590.1	RrubChr6G00154590	hypothetical protein CDL12_25061 [Handroanthus impetiginosus]	GO:0005737(cytoplasm);GO:0006457(protein folding)	ko04141(Protein processing in endoplasmic reticulum)
aly-miR395c-3p_L-1_1ss17GA	RrubChr7G00166380.1	RrubChr7G00166380	Galactokinase [Handroanthus impetiginosus]	GO:0004335(galactokinase activity);GO:0005524(ATP binding);GO:0005534(galactose binding);GO:0005737(cytoplasm);GO:0005829(cytosol);GO:0006012(galactose metabolic process);GO:0046835(carbohydrate phosphorylation);GO:0046872(metal ion binding)	NA
aly-miR395c-3p_L-1_1ss17GA	RrubChr7G00173970.1	RrubChr7G00173970	cellulose synthase-like protein G2 [Sesamum indicum]	GO:0000139(Golgi membrane);GO:0000271(polysaccharide biosynthetic process);GO:0000977(RNA polymerase II regulatory region sequence-specific DNA binding);GO:0005794(Golgi apparatus);GO:0005886(plasma membrane);GO:0009833(plant-type primary cell wall biogenesis);GO:0016021(integral component of membrane);GO:0016740(transferase activity);GO:0016757(transferase activity, transferring glycosyl groups)…	NA
aly-miR395c-3p_L-1_1ss17GA	RrubChr10G00251430.1	RrubChr10G00251430	uncharacterized protein At4g17910 isoform X1 [Sesamum indicum]	GO:0005739(mitochondrion);GO:0006506(GPI anchor biosynthetic process);GO:0016021(integral component of membrane);GO:0016746(transferase activity, transferring acyl groups)	ko00563(Glycosylphosphatidylinositol(GPI)-anchor biosynthesis)
aly-miR395c-3p_L-1_1ss17GA	RrubChr6G00137480.1	RrubChr6G00137480	DnaJ domain-containing protein [Cinnamomum micranthum f. kanehirae]	NA	NA
aly-miR395c-3p_L-1_1ss17GA	RrubChr6G00155890.1	RrubChr6G00155890	uncharacterized protein LOC105159799 [Sesamum indicum]	GO:0004252(serine-type endopeptidase activity);GO:0005737(cytoplasm);GO:0006508(proteolysis)	NA
aly-miR395c-3p_R+2_1ss17GA	RrubChr10G00246750.1	RrubChr10G00246750	ATP sulfurylase 1, chloroplastic-like [Sesamum indicum]	GO:0000103(sulfate assimilation);GO:0004020(adenylylsulfate kinase activity)	ko00920(Sulfur metabolism);ko00230(Purine metabolism);ko00450(Selenocompound metabolism);ko00261(Monobactam biosynthesis)
aly-miR395c-3p_R+2_1ss17GA	RrubChr1G00005180.1	RrubChr1G00005180	low affinity sulfate transporter 3 [Sesamum indicum]	GO:0005887(integral component of plasma membrane);GO:0015116(sulfate transmembrane transporter activity)	NA
aly-miR395c-3p_R+2_1ss17GA	RrubChr6G00140360.1	RrubChr6G00140360	CDPK-related kinase 3 [Sesamum indicum]	GO:0004683(calmodulin-dependent protein kinase activity);GO:0005516(calmodulin binding);GO:0005634(nucleus);GO:0005737(cytoplasm);GO:0005886(plasma membrane);GO:0009738(abscisic acid-activated signaling pathway);GO:0009931(calcium-dependent protein serine/threonine kinase activity);GO:0018105(peptidyl-serine phosphorylation);GO:0035556(intracellular signal transduction);GO:0046777(protein autopho…	NA
aly-miR395c-3p_R+2_1ss17GA	RrubChr7G00184530.1	RrubChr7G00184530	ATP sulfurylase 1, chloroplastic-like [Sesamum indicum]	GO:0000103(sulfate assimilation);GO:0004020(adenylylsulfate kinase activity)	ko00920(Sulfur metabolism);ko00230(Purine metabolism);ko00450(Selenocompound metabolism);ko00261(Monobactam biosynthesis)
aly-miR395c-3p_R+2_1ss17GA	RrubChr8G00192630.1	RrubChr8G00192630	hypothetical protein MIMGU_mgv1a021638mg [Erythranthe guttata]	GO:0003674(molecular_function);GO:0005575(cellular_component);GO:0008150(biological_process)	NA
aly-miR395h-5p_1ss9AC	RrubChr12G00284600.1	RrubChr12G00284600	putative cytochrome P450 [Plectranthus scutellarioides]	GO:0009809(lignin biosynthetic process);GO:0016020(membrane);GO:0016709(oxidoreductase activity, acting on paired donors, with incorporation or reduction of molecular oxygen, NAD(P)H as one donor, and incorporation of one atom of oxygen)	ko00940(Phenylpropanoid biosynthesis);ko00945(Stilbenoid, diarylheptanoid and gingerol biosynthesis);ko00941(Flavonoid biosynthesis)
aly-miR395h-5p_1ss9AC	RrubChr12G00286740.1	RrubChr12G00286740	cytochrome P450 CYP51G1 [Salvia miltiorrhiza]	GO:0005783(endoplasmic reticulum);GO:0005886(plasma membrane);GO:0008398(sterol 14-demethylase activity);GO:0016126(sterol biosynthetic process)	ko00100(Steroid biosynthesis)
aly-miR395h-5p_1ss9AC	RrubChr2G00045490.1	RrubChr2G00045490	HMG-Y-related protein B-like [Sesamum indicum]	NA	NA
aly-miR395h-5p_1ss9AC	RrubChr3G00060970.1	RrubChr3G00060970	glutamate synthase 1 [NADH], chloroplastic isoform X2 [Sesamum indicum]	GO:0005737(cytoplasm);GO:0006537(glutamate biosynthetic process);GO:0015930(glutamate synthase activity);GO:0019676(ammonia assimilation cycle)	ko00910(Nitrogen metabolism);ko00250(Alanine, aspartate and glutamate metabolism)
aly-miR395h-5p_1ss9AC	RrubChr3G00061960.1	RrubChr3G00061960	uncharacterized protein LOC105167921 [Sesamum indicum]	GO:0000070(mitotic sister chromatid segregation);GO:0003674(molecular_function);GO:0005634(nucleus);GO:0007064(mitotic sister chromatid cohesion);GO:0009793(embryo development ending in seed dormancy);GO:0010789(meiotic sister chromatid cohesion involved in meiosis I);GO:0045132(meiotic chromosome segregation);GO:0060623(regulation of chromosome condensation);GO:0071922(regulation of cohesin load…	NA
aly-miR395h-5p_1ss9AC	RrubChr3G00067800.1	RrubChr3G00067800	putative unusual protein kinase [Handroanthus impetiginosus]	GO:0004672(protein kinase activity);GO:0005524(ATP binding);GO:0005886(plasma membrane);GO:0006468(protein phosphorylation);GO:0009507(chloroplast)	NA
aly-miR395h-5p_1ss9AC	RrubChr3G00085000.1	RrubChr3G00085000	catalase isozyme 1 [Sesamum indicum]	GO:0004096(catalase activity);GO:0005737(cytoplasm);GO:0020037(heme binding);GO:0042542(response to hydrogen peroxide);GO:0042744(hydrogen peroxide catabolic process)	ko00630(Glyoxylate and dicarboxylate metabolism);ko00380(Tryptophan metabolism);ko04016(MAPK signaling pathway - plant);ko04146(Peroxisome)
aly-miR395h-5p_1ss9AC	RrubChr7G00181720.1	RrubChr7G00181720	Metalloendopeptidase family - saccharolysin & thimet oligopeptidase [Handroanthus impetiginosus]	GO:0004222(metalloendopeptidase activity);GO:0006518(peptide metabolic process);GO:0009507(chloroplast)	NA
aly-miR395h-5p_1ss9AC	RrubChr8G00206150.1	RrubChr8G00206150	PREDICTED: pyrophosphate--fructose 6-phosphate 1-phosphotransferase subunit beta [Erythranthe guttata]	GO:0003872(6-phosphofructokinase activity);GO:0005524(ATP binding);GO:0005618(cell wall);GO:0005737(cytoplasm);GO:0005829(cytosol);GO:0006002(fructose 6-phosphate metabolic process);GO:0006096(glycolytic process);GO:0009735(response to cytokinin);GO:0009749(response to glucose);GO:0010318(pyrophosphate-dependent phosphofructokinase complex, beta-subunit complex);GO:0015979(photosynthesis);GO:0016…	ko00010(Glycolysis / Gluconeogenesis);ko00030(Pentose phosphate pathway);ko00051(Fructose and mannose metabolism)
aly-MIR822-p3_2ss1GC17TA	RrubChr12G00290660.1	RrubChr12G00290660	Cytochrome c oxidase, subunit Vb/COX4 [Handroanthus impetiginosus]	GO:0004129(cytochrome-c oxidase activity);GO:0005739(mitochondrion);GO:0005740(mitochondrial envelope);GO:0006123(mitochondrial electron transport, cytochrome c to oxygen);GO:0008270(zinc ion binding);GO:0009535(chloroplast thylakoid membrane);GO:0046872(metal ion binding);GO:0050897(cobalt ion binding)	ko00190(Oxidative phosphorylation)
aly-MIR822-p3_2ss1GC17TA	RrubChr1G00006180.1	RrubChr1G00006180	beta-catenin-like protein 1 [Sesamum indicum]	GO:0005634(nucleus);GO:0005681(spliceosomal complex);GO:0008380(RNA splicing)	ko03040(Spliceosome)
aly-MIR822-p3_2ss1GC17TA	RrubChr4G00108070.1	RrubChr4G00108070	protein ABCI7, chloroplastic [Sesamum indicum]	GO:0005215(transporter activity);GO:0005515(protein binding);GO:0006810(transport);GO:0009507(chloroplast);GO:0009536(plastid);GO:0009570(chloroplast stroma);GO:0009793(embryo development ending in seed dormancy);GO:0010027(thylakoid membrane organization);GO:0016226(iron-sulfur cluster assembly)	NA
aly-MIR822-p3_2ss1GC17TA	RrubChr5G00113890.1	RrubChr5G00113890	calcium-dependent protein kinase 13 [Sesamum indicum]	GO:0004683(calmodulin-dependent protein kinase activity);GO:0005516(calmodulin binding);GO:0005634(nucleus);GO:0005737(cytoplasm);GO:0005886(plasma membrane);GO:0009738(abscisic acid-activated signaling pathway);GO:0009931(calcium-dependent protein serine/threonine kinase activity);GO:0018105(peptidyl-serine phosphorylation);GO:0035556(intracellular signal transduction);GO:0046777(protein autopho…	ko04626(Plant-pathogen interaction)
aly-MIR822-p3_2ss1GC17TA	RrubChr6G00164590.1	RrubChr6G00164590	hypothetical protein MIMGU_mgv1a008895mg [Erythranthe guttata]	GO:0005634(nucleus);GO:0005654(nucleoplasm);GO:0005730(nucleolus);GO:0006364(rRNA processing);GO:0010078(maintenance of root meristem identity);GO:0016435(rRNA (guanine) methyltransferase activity);GO:0048364(root development);GO:0048471(perinuclear region of cytoplasm);GO:0048527(lateral root development);GO:0070476(rRNA (guanine-N7)-methylation);GO:1990110(callus formation)	NA
aly-MIR822-p3_2ss1GC17TA	RrubChr9G00229740.1	RrubChr9G00229740	AP-4 complex subunit epsilon [Sesamum indicum]	GO:0005794(Golgi apparatus);GO:0005829(cytosol);GO:0005886(plasma membrane);GO:0005905(clathrin-coated pit);GO:0006886(intracellular protein transport);GO:0009506(plasmodesma);GO:0016192(vesicle-mediated transport);GO:0030124(AP-4 adaptor complex);GO:0030276(clathrin binding)	NA
aly-MIR822-p3_2ss1GC17TA	RrubChr12G00292910.1	RrubChr12G00292910	transcriptional adapter ADA2 isoform X1 [Sesamum indicum]	GO:0003682(chromatin binding);GO:0003700(DNA binding transcription factor activity);GO:0003713(transcription coactivator activity);GO:0004402(histone acetyltransferase activity);GO:0005634(nucleus);GO:0006338(chromatin remodeling);GO:0006357(regulation of transcription by RNA polymerase II);GO:0035066(positive regulation of histone acetylation)	NA
aly-MIR822-p3_2ss1GC17TA	RrubChr2G00042470.1	RrubChr2G00042470	glycine-rich RNA-binding protein 2, mitochondrial-like [Sesamum indicum]	GO:0003697(single-stranded DNA binding);GO:0003723(RNA binding);GO:0005507(copper ion binding);GO:0005515(protein binding);GO:0005524(ATP binding);GO:0005739(mitochondrion);GO:0006397(mRNA processing);GO:0009409(response to cold);GO:0016554(cytidine to uridine editing);GO:0080156(mitochondrial mRNA modification)	ko03040(Spliceosome)
aly-MIR822-p3_2ss1GC17TA	RrubChr8G00205040.1	RrubChr8G00205040	probable galacturonosyltransferase 4 [Sesamum indicum]	GO:0000139(Golgi membrane);GO:0005794(Golgi apparatus);GO:0016021(integral component of membrane);GO:0016051(carbohydrate biosynthetic process);GO:0016757(transferase activity, transferring glycosyl groups);GO:0045489(pectin biosynthetic process);GO:0047262(polygalacturonate 4-alpha-galacturonosyltransferase activity);GO:0071555(cell wall organization)	ko00520(Amino sugar and nucleotide sugar metabolism)
aly-MIR822-p3_2ss1GC17TA	RrubChr9G00231200.1	RrubChr9G00231200	protein RRC1 isoform X1 [Sesamum indicum]	GO:0003723(RNA binding);GO:0005634(nucleus);GO:0006397(mRNA processing);GO:0008380(RNA splicing);GO:0016607(nuclear speck)	ko03040(Spliceosome)
aqc-MIR160a-p3_2ss13TC17GC	RrubChr11G00264420.1	RrubChr11G00264420	pumilio homolog 2 [Sesamum indicum]	GO:0003723(RNA binding);GO:0003729(mRNA binding);GO:0003730(mRNA 3'-UTR binding);GO:0005737(cytoplasm);GO:0005829(cytosol);GO:0006417(regulation of translation)	NA
aqc-MIR160a-p3_2ss13TC17GC	RrubChr12G00292110.1	RrubChr12G00292110	PREDICTED: LOW QUALITY PROTEIN: isoeugenol synthase 1-like [Erythranthe guttata]	GO:0005737(cytoplasm);GO:0016651(oxidoreductase activity, acting on NAD(P)H);GO:0055114(oxidation-reduction process)	NA
aqc-MIR160a-p3_2ss13TC17GC	RrubChr2G00055560.1	RrubChr2G00055560	LOW QUALITY PROTEIN: protein RETICULATA, chloroplastic [Sesamum indicum]	GO:0003674(molecular_function);GO:0005739(mitochondrion);GO:0007275(multicellular organism development);GO:0009536(plastid);GO:0009706(chloroplast inner membrane);GO:0009941(chloroplast envelope);GO:0016021(integral component of membrane)	NA
aqc-MIR160a-p3_2ss13TC17GC	RrubChr3G00068700.1	RrubChr3G00068700	PREDICTED: F-box protein PP2-B10-like [Erythranthe guttata]	GO:0003674(molecular_function);GO:0005634(nucleus);GO:0009793(embryo development ending in seed dormancy)	NA
aqc-MIR160a-p3_2ss13TC17GC	RrubChr4G00108920.1	RrubChr4G00108920	galactinol synthase [Salvia miltiorrhiza]	GO:0008152(metabolic process);GO:0010325(raffinose family oligosaccharide biosynthetic process);GO:0047216(inositol 3-alpha-galactosyltransferase activity);GO:0052576(carbohydrate storage);GO:0070417(cellular response to cold)	ko00052(Galactose metabolism)
aqc-MIR160a-p3_2ss13TC17GC	RrubChr4G00111480.1	RrubChr4G00111480	hypothetical protein CQW23_31306 [Capsicum baccatum]	NA	NA
aqc-MIR160a-p3_2ss13TC17GC	RrubChr5G00124310.1	RrubChr5G00124310	uncharacterized protein ycf23-like [Sesamum indicum]	NA	NA
aqc-MIR160a-p3_2ss13TC17GC	RrubChr6G00136320.1	RrubChr6G00136320	Transposon Tf2-2 polyprotein [Vitis vinifera]	GO:0003723(RNA binding);GO:0003964(RNA-directed DNA polymerase activity);GO:0005737(cytoplasm);GO:0006278(RNA-dependent DNA biosynthetic process);GO:0015074(DNA integration)	NA
aqc-MIR160a-p3_2ss13TC17GC	RrubChr7G00168640.1	RrubChr7G00168640	dynein light chain 2, cytoplasmic [Dorcoceras hygrometricum]	GO:0003777(microtubule motor activity);GO:0005737(cytoplasm);GO:0005875(microtubule associated complex);GO:0007017(microtubule-based process);GO:0030286(dynein complex);GO:0060271(cilium assembly)	NA
aqc-MIR160a-p3_2ss13TC17GC	RrubChr7G00177390.1	RrubChr7G00177390	beta-galactosidase 9-like [Sesamum indicum]	GO:0004565(beta-galactosidase activity);GO:0005618(cell wall);GO:0005773(vacuole)	ko00052(Galactose metabolism);ko00600(Sphingolipid metabolism);ko00531(Glycosaminoglycan degradation);ko00604(Glycosphingolipid biosynthesis - ganglio series);ko00511(Other glycan degradation)
aqc-MIR160a-p3_2ss13TC17GC	RrubChr7G00180810.1	RrubChr7G00180810	ultraviolet-B receptor UVR8 [Sesamum indicum]	GO:0003682(chromatin binding);GO:0005737(cytoplasm);GO:0008150(biological_process);GO:0008536(Ran GTPase binding)	ko04120(Ubiquitin mediated proteolysis)
aqc-MIR160a-p3_2ss13TC17GC	RrubChr9G00219280.1	RrubChr9G00219280	uncharacterized protein LOC105163756 [Sesamum indicum]	GO:0005634(nucleus);GO:0005886(plasma membrane);GO:0009506(plasmodesma)	NA
aqc-MIR160a-p3_2ss13TC17GC	RrubChr3G00067480.1	RrubChr3G00067480	mitogen-activated protein kinase 15 [Sesamum indicum]	GO:0005634(nucleus)	ko04016(MAPK signaling pathway - plant)
aqc-MIR160a-p3_2ss13TC17GC	RrubChr9G00220700.1	RrubChr9G00220700	kinesin-like protein KIN-13B [Sesamum indicum]	GO:0003777(microtubule motor activity);GO:0005871(kinesin complex);GO:0007018(microtubule-based movement);GO:0016887(ATPase activity)	NA
aqc-MIR160a-p3_2ss13TC17GT	RrubChr10G00245540.1	RrubChr10G00245540	UNC93-like protein 1 [Sesamum indicum]	GO:0003674(molecular_function)	NA
aqc-MIR160a-p3_2ss13TC17GT	RrubChr10G00254500.1	RrubChr10G00254500	putative nucleoside-diphosphate sugar epimerase [Handroanthus impetiginosus]	GO:0009507(chloroplast);GO:0009536(plastid);GO:0009706(chloroplast inner membrane);GO:0009941(chloroplast envelope);GO:0010020(chloroplast fission);GO:0016491(oxidoreductase activity);GO:0042803(protein homodimerization activity);GO:0050662(coenzyme binding);GO:0055114(oxidation-reduction process)	NA
aqc-MIR160a-p3_2ss13TC17GT	RrubChr11G00264420.1	RrubChr11G00264420	pumilio homolog 2 [Sesamum indicum]	GO:0003723(RNA binding);GO:0003729(mRNA binding);GO:0003730(mRNA 3'-UTR binding);GO:0005737(cytoplasm);GO:0005829(cytosol);GO:0006417(regulation of translation)	NA
aqc-MIR160a-p3_2ss13TC17GT	RrubChr1G00001580.1	RrubChr1G00001580	CBL-interacting protein kinase 23 [Sesamum indicum]	GO:0004674(protein serine/threonine kinase activity);GO:0005634(nucleus);GO:0005737(cytoplasm);GO:0006468(protein phosphorylation);GO:0035556(intracellular signal transduction)	NA
aqc-MIR160a-p3_2ss13TC17GT	RrubChr1G00004680.1	RrubChr1G00004680	elongation factor 1-delta [Sesamum indicum]	GO:0003746(translation elongation factor activity);GO:0005829(cytosol);GO:0005840(ribosome);GO:0005853(eukaryotic translation elongation factor 1 complex);GO:0005886(plasma membrane);GO:0006414(translational elongation);GO:0009808(lignin metabolic process);GO:0016021(integral component of membrane);GO:0046686(response to cadmium ion);GO:0071668(plant-type cell wall assembly);GO:2001006(regulation…	NA
aqc-MIR160a-p3_2ss13TC17GT	RrubChr2G00041800.1	RrubChr2G00041800	Angio-associated migratory cell protein (contains WD40 repeats) [Handroanthus impetiginosus]	GO:0000166(nucleotide binding);GO:0005737(cytoplasm);GO:0005829(cytosol);GO:0005834(heterotrimeric G-protein complex);GO:0008150(biological_process)	NA
aqc-MIR160a-p3_2ss13TC17GT	RrubChr2G00044010.1	RrubChr2G00044010	PREDICTED: ACT domain-containing protein ACR6 [Erythranthe guttata]	GO:0009507(chloroplast);GO:0016597(amino acid binding)	NA
aqc-MIR160a-p3_2ss13TC17GT	RrubChr2G00055560.1	RrubChr2G00055560	LOW QUALITY PROTEIN: protein RETICULATA, chloroplastic [Sesamum indicum]	GO:0003674(molecular_function);GO:0005739(mitochondrion);GO:0007275(multicellular organism development);GO:0009536(plastid);GO:0009706(chloroplast inner membrane);GO:0009941(chloroplast envelope);GO:0016021(integral component of membrane)	NA
aqc-MIR160a-p3_2ss13TC17GT	RrubChr3G00068700.1	RrubChr3G00068700	PREDICTED: F-box protein PP2-B10-like [Erythranthe guttata]	GO:0003674(molecular_function);GO:0005634(nucleus);GO:0009793(embryo development ending in seed dormancy)	NA
aqc-MIR160a-p3_2ss13TC17GT	RrubChr4G00108920.1	RrubChr4G00108920	galactinol synthase [Salvia miltiorrhiza]	GO:0008152(metabolic process);GO:0010325(raffinose family oligosaccharide biosynthetic process);GO:0047216(inositol 3-alpha-galactosyltransferase activity);GO:0052576(carbohydrate storage);GO:0070417(cellular response to cold)	ko00052(Galactose metabolism)
aqc-MIR160a-p3_2ss13TC17GT	RrubChr4G00111480.1	RrubChr4G00111480	hypothetical protein CQW23_31306 [Capsicum baccatum]	NA	NA
aqc-MIR160a-p3_2ss13TC17GT	RrubChr5G00124310.1	RrubChr5G00124310	uncharacterized protein ycf23-like [Sesamum indicum]	NA	NA
aqc-MIR160a-p3_2ss13TC17GT	RrubChr5G00124570.1	RrubChr5G00124570	F-box/kelch-repeat protein At1g30090 isoform X2 [Sesamum indicum]	GO:0003674(molecular_function);GO:0005737(cytoplasm);GO:0008150(biological_process)	NA
aqc-MIR160a-p3_2ss13TC17GT	RrubChr5G00132310.1	RrubChr5G00132310	hydroxymethylglutaryl-CoA synthase [Isodon rubescens]	GO:0003985(acetyl-CoA C-acetyltransferase activity);GO:0004421(hydroxymethylglutaryl-CoA synthase activity);GO:0005739(mitochondrion);GO:0005829(cytosol);GO:0009506(plasmodesma);GO:0016126(sterol biosynthetic process);GO:0019287(isopentenyl diphosphate biosynthetic process, mevalonate pathway)	ko00650(Butanoate metabolism);ko00072(Synthesis and degradation of ketone bodies);ko00280(Valine, leucine and isoleucine degradation);ko00900(Terpenoid backbone biosynthesis)
aqc-MIR160a-p3_2ss13TC17GT	RrubChr6G00136320.1	RrubChr6G00136320	Transposon Tf2-2 polyprotein [Vitis vinifera]	GO:0003723(RNA binding);GO:0003964(RNA-directed DNA polymerase activity);GO:0005737(cytoplasm);GO:0006278(RNA-dependent DNA biosynthetic process);GO:0015074(DNA integration)	NA
aqc-MIR160a-p3_2ss13TC17GT	RrubChr6G00144510.1	RrubChr6G00144510	transketolase, chloroplastic [Sesamum indicum]	GO:0004802(transketolase activity);GO:0009535(chloroplast thylakoid membrane)	ko00030(Pentose phosphate pathway);ko00710(Carbon fixation in photosynthetic organisms);ko01051(Biosynthesis of ansamycins)
aqc-MIR160a-p3_2ss13TC17GT	RrubChr7G00177390.1	RrubChr7G00177390	beta-galactosidase 9-like [Sesamum indicum]	GO:0004565(beta-galactosidase activity);GO:0005618(cell wall);GO:0005773(vacuole)	ko00052(Galactose metabolism);ko00600(Sphingolipid metabolism);ko00531(Glycosaminoglycan degradation);ko00604(Glycosphingolipid biosynthesis - ganglio series);ko00511(Other glycan degradation)
aqc-MIR160a-p3_2ss13TC17GT	RrubChr7G00180810.1	RrubChr7G00180810	ultraviolet-B receptor UVR8 [Sesamum indicum]	GO:0003682(chromatin binding);GO:0005737(cytoplasm);GO:0008150(biological_process);GO:0008536(Ran GTPase binding)	ko04120(Ubiquitin mediated proteolysis)
aqc-MIR160a-p3_2ss13TC17GT	RrubChr9G00219280.1	RrubChr9G00219280	uncharacterized protein LOC105163756 [Sesamum indicum]	GO:0005634(nucleus);GO:0005886(plasma membrane);GO:0009506(plasmodesma)	NA
aqc-MIR160a-p3_2ss13TC17GT	RrubChr1G00010970.1	RrubChr1G00010970	hypothetical protein MIMGU_mgv1a003928mg [Erythranthe guttata]	GO:0003861(3-isopropylmalate dehydratase activity);GO:0009098(leucine biosynthetic process);GO:0009507(chloroplast);GO:0009536(plastid);GO:0009570(chloroplast stroma);GO:0016829(lyase activity);GO:0019761(glucosinolate biosynthetic process);GO:0046686(response to cadmium ion);GO:0046872(metal ion binding);GO:0050486(intramolecular transferase activity, transferring hydroxy groups);GO:0051539(4 ir…	ko00660(C5-Branched dibasic acid metabolism);ko00290(Valine, leucine and isoleucine biosynthesis);ko00966(Glucosinolate biosynthesis)
aqc-MIR160a-p3_2ss13TC17GT	RrubChr1G00017940.1	RrubChr1G00017940	F-box protein At1g78280 [Sesamum indicum]	GO:0005634(nucleus);GO:0005829(cytosol);GO:0007166(cell surface receptor signaling pathway);GO:0016757(transferase activity, transferring glycosyl groups)	NA
aqc-MIR160a-p3_2ss13TC17GT	RrubChr3G00067480.1	RrubChr3G00067480	mitogen-activated protein kinase 15 [Sesamum indicum]	GO:0005634(nucleus)	ko04016(MAPK signaling pathway - plant)
aqc-MIR160a-p3_2ss13TC17GT	RrubChr5G00133180.1	RrubChr5G00133180	monocopper oxidase-like protein SKU5 [Sesamum indicum]	GO:0005507(copper ion binding);GO:0009505(plant-type cell wall);GO:0009506(plasmodesma);GO:0016722(oxidoreductase activity, oxidizing metal ions);GO:0046658(anchored component of plasma membrane)	NA
aqc-MIR160a-p3_2ss13TC17GT	RrubChr8G00206820.1	RrubChr8G00206820	putative membrane protein [Handroanthus impetiginosus]	GO:0005789(endoplasmic reticulum membrane);GO:0006508(proteolysis);GO:0016021(integral component of membrane)	ko04141(Protein processing in endoplasmic reticulum)
aqc-MIR160a-p3_2ss13TC17GT	RrubChr9G00215870.1	RrubChr9G00215870	methionine--tRNA ligase, chloroplastic/mitochondrial isoform X1 [Sesamum indicum]	GO:0004825(methionine-tRNA ligase activity);GO:0005829(cytosol);GO:0006431(methionyl-tRNA aminoacylation)	ko00450(Selenocompound metabolism);ko00970(Aminoacyl-tRNA biosynthesis)
aqc-MIR319-p5_2ss15CT18CA	RrubChr10G00242620.1	RrubChr10G00242620	probable WRKY transcription factor 57 isoform X2 [Sesamum indicum]	GO:0003700(DNA binding transcription factor activity);GO:0005634(nucleus);GO:0006351(transcription, DNA-templated);GO:0006355(regulation of transcription, DNA-templated);GO:0006970(response to osmotic stress);GO:0009414(response to water deprivation);GO:0009651(response to salt stress);GO:0043565(sequence-specific DNA binding);GO:0044212(transcription regulatory region DNA binding)	ko04016(MAPK signaling pathway - plant);ko04626(Plant-pathogen interaction)
aqc-MIR319-p5_2ss15CT18CA	RrubChr10G00258850.1	RrubChr10G00258850	PREDICTED: vacuolar protein sorting-associated protein 52 A [Erythranthe guttata]	GO:0000139(Golgi membrane);GO:0000938(GARP complex);GO:0005515(protein binding);GO:0005794(Golgi apparatus);GO:0006896(Golgi to vacuole transport);GO:0009860(pollen tube growth);GO:0010008(endosome membrane);GO:0012505(endomembrane system);GO:0015031(protein transport);GO:0017137(Rab GTPase binding);GO:0019905(syntaxin binding);GO:0019953(sexual reproduction);GO:0032456(endocytic recycling);GO:00…	NA
aqc-MIR319-p5_2ss15CT18CA	RrubChr11G00272940.1	RrubChr11G00272940	LOW QUALITY PROTEIN: BTB/POZ domain-containing protein At1g63850 [Sesamum indicum]	GO:0005634(nucleus);GO:0016567(protein ubiquitination)	NA
aqc-MIR319-p5_2ss15CT18CA	RrubChr12G00298100.1	RrubChr12G00298100	E3 ubiquitin-protein ligase ATL6 [Sesamum indicum]	GO:0004842(ubiquitin-protein transferase activity);GO:0005576(extracellular region);GO:0005886(plasma membrane);GO:0008270(zinc ion binding);GO:0009814(defense response, incompatible interaction);GO:0009816(defense response to bacterium, incompatible interaction);GO:0010200(response to chitin);GO:0016021(integral component of membrane);GO:0016567(protein ubiquitination);GO:0043161(proteasome-medi…	NA
aqc-MIR319-p5_2ss15CT18CA	RrubChr12G00300960.1	RrubChr12G00300960	uncharacterized protein LOC105169064 [Sesamum indicum]	GO:0008150(biological_process);GO:0016757(transferase activity, transferring glycosyl groups)	ko03013(RNA transport)
aqc-MIR319-p5_2ss15CT18CA	RrubChr1G00010040.1	RrubChr1G00010040	Serine/threonine protein kinase [Handroanthus impetiginosus]	GO:0004672(protein kinase activity);GO:0004674(protein serine/threonine kinase activity);GO:0005524(ATP binding);GO:0005886(plasma membrane);GO:0006468(protein phosphorylation);GO:0007169(transmembrane receptor protein tyrosine kinase signaling pathway);GO:0009506(plasmodesma);GO:0016021(integral component of membrane)	ko00310(Lysine degradation)
aqc-MIR319-p5_2ss15CT18CA	RrubChr2G00045560.1	RrubChr2G00045560	auxin response factor 19 [Sesamum indicum]	GO:0003677(DNA binding);GO:0003700(DNA binding transcription factor activity);GO:0005515(protein binding);GO:0005634(nucleus);GO:0006351(transcription, DNA-templated);GO:0006355(regulation of transcription, DNA-templated);GO:0009723(response to ethylene);GO:0009733(response to auxin);GO:0009734(auxin-activated signaling pathway);GO:0010311(lateral root formation);GO:0043565(sequence-specific DNA …	ko04075(Plant hormone signal transduction)
aqc-MIR319-p5_2ss15CT18CA	RrubChr4G00090030.1	RrubChr4G00090030	hypothetical protein CDL12_10866 [Handroanthus impetiginosus]	GO:0009507(chloroplast);GO:0009535(chloroplast thylakoid membrane);GO:0010258(NADH dehydrogenase complex (plastoquinone) assembly);GO:0010598(NAD(P)H dehydrogenase complex (plastoquinone));GO:0016655(oxidoreductase activity, acting on NAD(P)H, quinone or similar compound as acceptor);GO:0048038(quinone binding);GO:0055114(oxidation-reduction process)	NA
aqc-MIR319-p5_2ss15CT18CA	RrubChr4G00092550.1	RrubChr4G00092550	cytokinin riboside 5'-monophosphate phosphoribohydrolase LOG1-like [Sesamum indicum]	GO:0005634(nucleus);GO:0005829(cytosol);GO:0009691(cytokinin biosynthetic process);GO:0016799(hydrolase activity, hydrolyzing N-glycosyl compounds)	NA
aqc-MIR319-p5_2ss15CT18CA	RrubChr4G00097560.1	RrubChr4G00097560	G1/S-specific cyclin D [Handroanthus impetiginosus]	GO:0005515(protein binding);GO:0005634(nucleus);GO:0007049(cell cycle);GO:0016538(cyclin-dependent protein serine/threonine kinase regulator activity);GO:0051301(cell division);GO:0051726(regulation of cell cycle)	NA
aqc-MIR319-p5_2ss15CT18CA	RrubChr5G00131380.1	RrubChr5G00131380	Acetylglucosaminyltransferase EXT1/exostosin 1 [Handroanthus impetiginosus]	GO:0003824(catalytic activity);GO:0005794(Golgi apparatus);GO:0006486(protein glycosylation);GO:0016020(membrane);GO:0016021(integral component of membrane);GO:0016757(transferase activity, transferring glycosyl groups)	NA
aqc-MIR319-p5_2ss15CT18CA	RrubChr6G00140550.1	RrubChr6G00140550	probable galactinol--sucrose galactosyltransferase 2 [Sesamum indicum]	GO:0003824(catalytic activity);GO:0004553(hydrolase activity, hydrolyzing O-glycosyl compounds);GO:0005737(cytoplasm);GO:0006979(response to oxidative stress);GO:0009506(plasmodesma);GO:0034484(raffinose catabolic process);GO:0047274(galactinol-sucrose galactosyltransferase activity);GO:0052692(raffinose alpha-galactosidase activity);GO:0080167(response to karrikin)	ko00052(Galactose metabolism)
aqc-MIR319-p5_2ss15CT18CA	RrubChr6G00145750.1	RrubChr6G00145750	Protein containing a U1-type Zn-finger and implicated in RNA splicing or processing [Handroanthus impetiginosus]	GO:0003690(double-stranded DNA binding);GO:0005634(nucleus);GO:0006260(DNA replication);GO:0006974(cellular response to DNA damage stimulus)	NA
aqc-MIR319-p5_2ss15CT18CA	RrubChr6G00162800.1	RrubChr6G00162800	PREDICTED: peroxisomal and mitochondrial division factor 2 [Erythranthe guttata]	NA	NA
aqc-MIR319-p5_2ss15CT18CA	RrubChr7G00176090.1	RrubChr7G00176090	UDP-glucosyltransferase [Leonurus japonicus]	GO:0009813(flavonoid biosynthetic process);GO:0043231(intracellular membrane-bounded organelle);GO:0052696(flavonoid glucuronidation);GO:0080043(quercetin 3-O-glucosyltransferase activity);GO:0080044(quercetin 7-O-glucosyltransferase activity)	NA
aqc-MIR319-p5_2ss15CT18CA	RrubChr8G00209080.1	RrubChr8G00209080	guanylate-binding protein 1 [Sesamum indicum]	GO:0003924(GTPase activity);GO:0005525(GTP binding);GO:0005634(nucleus);GO:0005730(nucleolus);GO:0006955(immune response);GO:0009507(chloroplast)	NA
aqc-MIR319-p5_2ss15CT18CA	RrubChr11G00274170.1	RrubChr11G00274170	putative clathrin assembly protein At5g35200 [Sesamum indicum]	GO:0005545(1-phosphatidylinositol binding);GO:0005794(Golgi apparatus);GO:0005886(plasma membrane);GO:0005905(clathrin-coated pit);GO:0006897(endocytosis);GO:0030136(clathrin-coated vesicle);GO:0030276(clathrin binding);GO:0048268(clathrin coat assembly)	NA
aqc-MIR319-p5_2ss15CT18CA	RrubChr3G00065570.1	RrubChr3G00065570	methyl-CpG-binding domain-containing protein 13 isoform X1 [Sesamum indicum]	GO:0000122(negative regulation of transcription by RNA polymerase II);GO:0005634(nucleus);GO:0006346(methylation-dependent chromatin silencing);GO:0008327(methyl-CpG binding)	NA
aqc-MIR319-p5_2ss15CT18CA	RrubChr3G00067410.1	RrubChr3G00067410	heavy metal-associated isoprenylated plant protein 33 [Sesamum indicum]	GO:0005737(cytoplasm);GO:0030001(metal ion transport);GO:0046914(transition metal ion binding);GO:0046916(cellular transition metal ion homeostasis)	NA
aqc-MIR319-p5_2ss15CT18CA	RrubChr3G00085130.1	RrubChr3G00085130	Apoptotic ATPase [Handroanthus impetiginosus]	GO:0005515(protein binding);GO:0005524(ATP binding);GO:0005634(nucleus);GO:0006952(defense response);GO:0043531(ADP binding)	ko04626(Plant-pathogen interaction)
aqc-MIR319-p5_2ss15CT18CA	RrubChr8G00199710.1	RrubChr8G00199710	PREDICTED: uncharacterized protein LOC105968772 [Erythranthe guttata]	GO:0003674(molecular_function);GO:0008150(biological_process);GO:0016021(integral component of membrane)	NA
aqc-MIR319-p5_2ss15CT18CA	RrubChr8G00208230.1	RrubChr8G00208230	protein MOR1 isoform X1 [Sesamum indicum]	GO:0000226(microtubule cytoskeleton organization);GO:0000776(kinetochore);GO:0000911(cytokinesis by cell plate formation);GO:0000922(spindle pole);GO:0005634(nucleus);GO:0005813(centrosome);GO:0005819(spindle);GO:0005874(microtubule);GO:0007051(spindle organization);GO:0008017(microtubule binding);GO:0009506(plasmodesma);GO:0009524(phragmoplast);GO:0009574(preprophase band);GO:0009920(cell plate …	NA
aqc-MIR396b-p3_1ss10AT	RrubChr11G00262170.1	RrubChr11G00262170	cell division cycle protein 48 homolog [Sesamum indicum]	GO:0005515(protein binding);GO:0005524(ATP binding);GO:0005618(cell wall);GO:0005634(nucleus);GO:0005794(Golgi apparatus);GO:0005829(cytosol);GO:0005856(cytoskeleton);GO:0007049(cell cycle);GO:0009524(phragmoplast);GO:0015031(protein transport);GO:0016787(hydrolase activity);GO:0016887(ATPase activity);GO:0051301(cell division)	ko04141(Protein processing in endoplasmic reticulum)
aqc-MIR396b-p3_1ss10AT	RrubChr2G00038540.1	RrubChr2G00038540	uncharacterized protein LOC105171733 isoform X2 [Sesamum indicum]	NA	NA
aqc-MIR396b-p3_1ss10AT	RrubChr2G00049520.1	RrubChr2G00049520	Reticulon [Handroanthus impetiginosus]	GO:0003674(molecular_function);GO:0005783(endoplasmic reticulum);GO:0005789(endoplasmic reticulum membrane);GO:0008150(biological_process);GO:0016021(integral component of membrane)	NA
aqc-MIR396b-p3_1ss10AT	RrubChr5G00134210.1	RrubChr5G00134210	hypothetical protein CUMW_007130 [Citrus unshiu]	GO:0005515(protein binding)	ko04016(MAPK signaling pathway - plant);ko04070(Phosphatidylinositol signaling system);ko04626(Plant-pathogen interaction)
aqc-MIR396b-p3_1ss10AT	RrubChr6G00164500.1	RrubChr6G00164500	rhodanese-like domain-containing protein 8, chloroplastic [Sesamum indicum]	GO:0003674(molecular_function);GO:0008150(biological_process)	NA
aqc-MIR396b-p3_1ss10AT	RrubChr8G00202100.1	RrubChr8G00202100	uncharacterized protein LOC105175153 [Sesamum indicum]	GO:0005576(extracellular region);GO:0016021(integral component of membrane);GO:0016757(transferase activity, transferring glycosyl groups)	ko00514(Other types of O-glycan biosynthesis)
aqc-MIR396b-p3_1ss10AT	RrubChr1G00009450.1	RrubChr1G00009450	uncharacterized protein LOC105174401 isoform X1 [Sesamum indicum]	GO:0005634(nucleus);GO:0005886(plasma membrane)	NA
aqc-MIR396b-p3_1ss10AT	RrubChr1G00010650.1	RrubChr1G00010650	pentatricopeptide repeat-containing protein At3g06430, chloroplastic [Sesamum indicum]	GO:0004519(endonuclease activity);GO:0005739(mitochondrion);GO:0009451(RNA modification);GO:0009507(chloroplast);GO:0009553(embryo sac development);GO:0009555(pollen development);GO:0009793(embryo development ending in seed dormancy);GO:0019843(rRNA binding);GO:0048868(pollen tube development)	NA
ath-miR156a-5p_L+1	RrubChr10G00242200.1	RrubChr10G00242200	uncharacterized protein LOC105162332 [Sesamum indicum]	NA	NA
ath-miR156a-5p_L+1	RrubChr11G00267970.1	RrubChr11G00267970	Protein arginine N-methyltransferase PRMT1 [Handroanthus impetiginosus]	GO:0005829(cytosol);GO:0006355(regulation of transcription, DNA-templated);GO:0008469(histone-arginine N-methyltransferase activity);GO:0035242(protein-arginine omega-N asymmetric methyltransferase activity)	NA
ath-miR156a-5p_L+1	RrubChr11G00270760.1	RrubChr11G00270760	tRNA delta(2)-isopentenylpyrophosphate transferase [Handroanthus impetiginosus]	GO:0005739(mitochondrion);GO:0006400(tRNA modification);GO:0052381(tRNA dimethylallyltransferase activity)	ko00908(Zeatin biosynthesis)
ath-miR156a-5p_L+1	RrubChr1G00015750.1	RrubChr1G00015750	Histone acetyltransferase [Handroanthus impetiginosus]	GO:0003677(DNA binding);GO:0005634(nucleus);GO:0006355(regulation of transcription, DNA-templated)	NA
ath-miR156a-5p_L+1	RrubChr3G00075420.1	RrubChr3G00075420	phosphoinositide phosphatase SAC2 [Sesamum indicum]	GO:0004439(phosphatidylinositol-4,5-bisphosphate 5-phosphatase activity);GO:0005634(nucleus);GO:0005774(vacuolar membrane);GO:0007033(vacuole organization);GO:0036092(phosphatidylinositol-3-phosphate biosynthetic process);GO:0042578(phosphoric ester hydrolase activity)	ko00562(Inositol phosphate metabolism);ko04070(Phosphatidylinositol signaling system)
ath-miR156a-5p_L+1	RrubChr5G00135690.1	RrubChr5G00135690	SQUAMOSA promoter binding protein-like 11, partial [Salvia miltiorrhiza]	GO:0003677(DNA binding);GO:0003700(DNA binding transcription factor activity);GO:0005634(nucleus);GO:0005737(cytoplasm);GO:0006351(transcription, DNA-templated);GO:0006355(regulation of transcription, DNA-templated);GO:0010228(vegetative to reproductive phase transition of meristem);GO:0046872(metal ion binding);GO:0048366(leaf development);GO:0048653(anther development);GO:2000025(regulation of …	NA
ath-miR156a-5p_L+1	RrubChr6G00157110.1	RrubChr6G00157110	SQUAMOSA promoter binding protein-like 5, partial [Salvia miltiorrhiza]	GO:0003677(DNA binding);GO:0003700(DNA binding transcription factor activity);GO:0005634(nucleus);GO:0006351(transcription, DNA-templated);GO:0006355(regulation of transcription, DNA-templated);GO:0043565(sequence-specific DNA binding);GO:0044212(transcription regulatory region DNA binding);GO:0046872(metal ion binding);GO:0048510(regulation of timing of transition from vegetative to reproductive…	ko04075(Plant hormone signal transduction)
ath-miR156a-5p_L+1	RrubChr8G00196790.1	RrubChr8G00196790	probable sodium/metabolite cotransporter BASS1, chloroplastic [Sesamum indicum]	GO:0005215(transporter activity);GO:0006814(sodium ion transport);GO:0008508(bile acid:sodium symporter activity);GO:0009507(chloroplast);GO:0009941(chloroplast envelope);GO:0016020(membrane);GO:0016021(integral component of membrane)	NA
ath-miR156a-5p_L+1	RrubChr8G00204210.1	RrubChr8G00204210	elongation factor 2-like [Sesamum indicum]	GO:0003924(GTPase activity);GO:0005622(intracellular);GO:0006412(translation)	NA
ath-miR156a-5p_L+1	RrubChr10G00250740.1	RrubChr10G00250740	mediator of RNA polymerase II transcription subunit 25-like isoform X1 [Sesamum indicum]	GO:0003677(DNA binding);GO:0003713(transcription coactivator activity);GO:0005515(protein binding);GO:0005575(cellular_component);GO:0005634(nucleus);GO:0006351(transcription, DNA-templated);GO:0009585(red, far-red light phototransduction);GO:0009867(jasmonic acid mediated signaling pathway);GO:0009908(flower development);GO:0009909(regulation of flower development);GO:0009911(positive regulation…	NA
ath-miR156a-5p_L+1	RrubChr3G00066830.1	RrubChr3G00066830	Magnesium chelatase [Handroanthus impetiginosus]	GO:0005524(ATP binding);GO:0005618(cell wall);GO:0009507(chloroplast);GO:0009570(chloroplast stroma);GO:0009735(response to cytokinin);GO:0010007(magnesium chelatase complex);GO:0015979(photosynthesis);GO:0015995(chlorophyll biosynthetic process);GO:0016851(magnesium chelatase activity);GO:0016887(ATPase activity)	ko00860(Porphyrin and chlorophyll metabolism)
ath-miR156a-5p_L-2R+1	RrubChr10G00259220.1	RrubChr10G00259220	PREDICTED: protein TIC 40, chloroplastic [Erythranthe guttata]	GO:0005515(protein binding);GO:0005737(cytoplasm);GO:0009507(chloroplast);GO:0009535(chloroplast thylakoid membrane);GO:0009658(chloroplast organization);GO:0009706(chloroplast inner membrane);GO:0009941(chloroplast envelope);GO:0016020(membrane);GO:0016021(integral component of membrane);GO:0031897(Tic complex);GO:0045037(protein import into chloroplast stroma)	ko03050(Proteasome)
ath-miR156a-5p_L-2R+1	RrubChr1G00007300.1	RrubChr1G00007300	protein ABA DEFICIENT 4, chloroplastic-like isoform X1 [Sesamum indicum]	GO:0009517(PSII associated light-harvesting complex II);GO:0009688(abscisic acid biosynthetic process);GO:0009941(chloroplast envelope);GO:0010117(photoprotection);GO:0016021(integral component of membrane);GO:0016122(xanthophyll metabolic process);GO:0031969(chloroplast membrane);GO:0032928(regulation of superoxide anion generation)	ko00561(Glycerolipid metabolism)
ath-miR156a-5p_L-2R+1	RrubChr1G00012460.1	RrubChr1G00012460	putative V-ATPase proteolipid C-like domain protein [Helianthus annuus]	GO:0000220(vacuolar proton-transporting V-type ATPase, V0 domain);GO:0007035(vacuolar acidification);GO:0016021(integral component of membrane);GO:0046961(proton-transporting ATPase activity, rotational mechanism)	ko00190(Oxidative phosphorylation);ko04145(Phagosome)
ath-miR156a-5p_L-2R+1	RrubChr2G00035000.1	RrubChr2G00035000	peptide methionine sulfoxide reductase A1-like [Sesamum indicum]	GO:0005739(mitochondrion);GO:0006464(cellular protein modification process);GO:0008113(peptide-methionine (S)-S-oxide reductase activity);GO:0009416(response to light stimulus);GO:0009507(chloroplast);GO:0009570(chloroplast stroma);GO:0009735(response to cytokinin);GO:0009941(chloroplast envelope);GO:0010114(response to red light);GO:0010218(response to far red light);GO:0034599(cellular response…	NA
ath-miR156a-5p_L-2R+1	RrubChr3G00066570.1	RrubChr3G00066570	putative cell division cycle ATPase [Sesamum indicum]	GO:0005634(nucleus);GO:0008568(microtubule-severing ATPase activity);GO:0031122(cytoplasmic microtubule organization)	ko03013(RNA transport)
ath-miR156a-5p_L-2R+1	RrubChr3G00074990.1	RrubChr3G00074990	uncharacterized protein LOC105157890 [Sesamum indicum]	GO:0046922(peptide-O-fucosyltransferase activity)	ko00514(Other types of O-glycan biosynthesis)
ath-miR156a-5p_L-2R+1	RrubChr3G00075420.1	RrubChr3G00075420	phosphoinositide phosphatase SAC2 [Sesamum indicum]	GO:0004439(phosphatidylinositol-4,5-bisphosphate 5-phosphatase activity);GO:0005634(nucleus);GO:0005774(vacuolar membrane);GO:0007033(vacuole organization);GO:0036092(phosphatidylinositol-3-phosphate biosynthetic process);GO:0042578(phosphoric ester hydrolase activity)	ko00562(Inositol phosphate metabolism);ko04070(Phosphatidylinositol signaling system)
ath-miR156a-5p_L-2R+1	RrubChr4G00092730.1	RrubChr4G00092730	V-type proton ATPase 16 kDa proteolipid subunit-like [Sesamum indicum]	GO:0000220(vacuolar proton-transporting V-type ATPase, V0 domain);GO:0007035(vacuolar acidification);GO:0016021(integral component of membrane);GO:0046961(proton-transporting ATPase activity, rotational mechanism)	ko00190(Oxidative phosphorylation);ko04145(Phagosome)
ath-miR156a-5p_L-2R+1	RrubChr5G00126790.1	RrubChr5G00126790	(DL)-glycerol-3-phosphatase 2 [Sesamum indicum]	GO:0000121(glycerol-1-phosphatase activity);GO:0005739(mitochondrion);GO:0005829(cytosol);GO:0006114(glycerol biosynthetic process);GO:0016311(dephosphorylation);GO:0016787(hydrolase activity);GO:0043136(glycerol-3-phosphatase activity);GO:0046872(metal ion binding)	NA
ath-miR156a-5p_L-2R+1	RrubChr5G00134710.1	RrubChr5G00134710	protein SMG7 [Sesamum indicum]	GO:0000184(nuclear-transcribed mRNA catabolic process, nonsense-mediated decay);GO:0000932(P-body);GO:0004540(ribonuclease activity);GO:0005515(protein binding);GO:0005634(nucleus);GO:0005697(telomerase holoenzyme complex);GO:0006406(mRNA export from nucleus);GO:0007004(telomere maintenance via telomerase);GO:0042162(telomeric DNA binding);GO:0043021(ribonucleoprotein complex binding);GO:0043487(…	ko03015(mRNA surveillance pathway)
ath-miR156a-5p_L-2R+1	RrubChr6G00149700.1	RrubChr6G00149700	RAVE (regulator of V-ATPase assembly) complex subunit RAV1/DMX protein, WD repeat superfamily [Handroanthus impetiginosus]	GO:0003674(molecular_function);GO:0007035(vacuolar acidification);GO:0043291(RAVE complex);GO:0070072(vacuolar proton-transporting V-type ATPase complex assembly)	NA
ath-miR156a-5p_L-2R+1	RrubChr6G00164580.1	RrubChr6G00164580	Oligosaccharyltransferase, STT3 subunit [Handroanthus impetiginosus]	GO:0004579(dolichyl-diphosphooligosaccharide-protein glycotransferase activity);GO:0008250(oligosaccharyltransferase complex);GO:0018279(protein N-linked glycosylation via asparagine);GO:0043687(post-translational protein modification)	ko00510(N-Glycan biosynthesis);ko04141(Protein processing in endoplasmic reticulum)
ath-miR156a-5p_L-2R+1	RrubChr7G00180430.1	RrubChr7G00180430	PREDICTED: vacuolar protein sorting-associated protein 35A [Erythranthe guttata]	GO:0005770(late endosome);GO:0006886(intracellular protein transport);GO:0030904(retromer complex);GO:0042147(retrograde transport, endosome to Golgi)	ko04144(Endocytosis)
ath-miR156a-5p_L-2R+1	RrubChr10G00245960.1	RrubChr10G00245960	pleiotropic drug resistance protein 2 [Sesamum indicum]	GO:0005886(plasma membrane);GO:0016021(integral component of membrane);GO:0042626(ATPase activity, coupled to transmembrane movement of substances)	ko02010(ABC transporters)
ath-miR156a-5p_L-2R+1	RrubChr11G00262160.1	RrubChr11G00262160	Transporter, ABC superfamily (Breast cancer resistance protein) [Handroanthus impetiginosus]	GO:0005886(plasma membrane);GO:0016021(integral component of membrane);GO:0042626(ATPase activity, coupled to transmembrane movement of substances)	ko02010(ABC transporters)
ath-miR156a-5p_L-2R+1	RrubChr11G00267970.1	RrubChr11G00267970	Protein arginine N-methyltransferase PRMT1 [Handroanthus impetiginosus]	GO:0005829(cytosol);GO:0006355(regulation of transcription, DNA-templated);GO:0008469(histone-arginine N-methyltransferase activity);GO:0035242(protein-arginine omega-N asymmetric methyltransferase activity)	NA
ath-miR156a-5p_L-2R+1	RrubChr4G00095400.1	RrubChr4G00095400	uncharacterized protein LOC105155485 [Sesamum indicum]	GO:0003723(RNA binding);GO:0003735(structural constituent of ribosome);GO:0006412(translation);GO:0022626(cytosolic ribosome)	ko03010(Ribosome)
ath-miR156a-5p_L-2R+1	RrubChr4G00108410.1	RrubChr4G00108410	kunitz trypsin inhibitor 2 [Sesamum indicum]	GO:0004866(endopeptidase inhibitor activity);GO:0005576(extracellular region);GO:0005618(cell wall);GO:0048046(apoplast)	NA
ath-miR156a-5p_L-2R+1	RrubChr4G00110940.1	RrubChr4G00110940	SQUAMOSA promoter binding protein-like 2, partial [Salvia miltiorrhiza]	GO:0003677(DNA binding);GO:0003700(DNA binding transcription factor activity);GO:0005634(nucleus);GO:0006351(transcription, DNA-templated);GO:0006355(regulation of transcription, DNA-templated);GO:0043565(sequence-specific DNA binding);GO:0044212(transcription regulatory region DNA binding);GO:0046872(metal ion binding);GO:0048510(regulation of timing of transition from vegetative to reproductive…	NA
ath-miR156a-5p_L-2R+1	RrubChr5G00129720.1	RrubChr5G00129720	hypothetical protein CDL12_10579 [Handroanthus impetiginosus]	GO:0003677(DNA binding);GO:0003700(DNA binding transcription factor activity);GO:0005634(nucleus);GO:0006351(transcription, DNA-templated);GO:0006355(regulation of transcription, DNA-templated);GO:0009873(ethylene-activated signaling pathway)	NA
ath-miR156a-5p_L-2R+1	RrubChr8G00201730.1	RrubChr8G00201730	NA	NA	NA
ath-miR156a-5p_L-2R+1	RrubChr8G00204210.1	RrubChr8G00204210	elongation factor 2-like [Sesamum indicum]	GO:0003924(GTPase activity);GO:0005622(intracellular);GO:0006412(translation)	NA
ath-miR156a-5p_R+1	RrubChr10G00242200.1	RrubChr10G00242200	uncharacterized protein LOC105162332 [Sesamum indicum]	NA	NA
ath-miR156a-5p_R+1	RrubChr10G00245960.1	RrubChr10G00245960	pleiotropic drug resistance protein 2 [Sesamum indicum]	GO:0005886(plasma membrane);GO:0016021(integral component of membrane);GO:0042626(ATPase activity, coupled to transmembrane movement of substances)	ko02010(ABC transporters)
ath-miR156a-5p_R+1	RrubChr10G00252490.1	RrubChr10G00252490	dynamin-related protein 3A-like [Sesamum indicum]	GO:0000266(mitochondrial fission);GO:0003924(GTPase activity);GO:0005515(protein binding);GO:0005525(GTP binding);GO:0005739(mitochondrion);GO:0005777(peroxisome);GO:0005829(cytosol);GO:0005886(plasma membrane);GO:0007031(peroxisome organization);GO:0007049(cell cycle);GO:0007165(signal transduction);GO:0008017(microtubule binding);GO:0009791(post-embryonic development);GO:0016021(integral compon…	NA
ath-miR156a-5p_R+1	RrubChr11G00270760.1	RrubChr11G00270760	tRNA delta(2)-isopentenylpyrophosphate transferase [Handroanthus impetiginosus]	GO:0005739(mitochondrion);GO:0006400(tRNA modification);GO:0052381(tRNA dimethylallyltransferase activity)	ko00908(Zeatin biosynthesis)
ath-miR156a-5p_R+1	RrubChr1G00015750.1	RrubChr1G00015750	Histone acetyltransferase [Handroanthus impetiginosus]	GO:0003677(DNA binding);GO:0005634(nucleus);GO:0006355(regulation of transcription, DNA-templated)	NA
ath-miR156a-5p_R+1	RrubChr3G00065160.1	RrubChr3G00065160	SQUAMOSA promoter binding protein-like 6, partial [Salvia miltiorrhiza]	GO:0003677(DNA binding);GO:0003700(DNA binding transcription factor activity);GO:0005634(nucleus);GO:0005737(cytoplasm);GO:0006351(transcription, DNA-templated);GO:0006355(regulation of transcription, DNA-templated);GO:0010228(vegetative to reproductive phase transition of meristem);GO:0046872(metal ion binding);GO:0048366(leaf development);GO:0048653(anther development);GO:2000025(regulation of …	NA
ath-miR156a-5p_R+1	RrubChr4G00110940.1	RrubChr4G00110940	SQUAMOSA promoter binding protein-like 2, partial [Salvia miltiorrhiza]	GO:0003677(DNA binding);GO:0003700(DNA binding transcription factor activity);GO:0005634(nucleus);GO:0006351(transcription, DNA-templated);GO:0006355(regulation of transcription, DNA-templated);GO:0043565(sequence-specific DNA binding);GO:0044212(transcription regulatory region DNA binding);GO:0046872(metal ion binding);GO:0048510(regulation of timing of transition from vegetative to reproductive…	NA
ath-miR156a-5p_R+1	RrubChr4G00111110.1	RrubChr4G00111110	hypothetical protein CDL12_29790 [Handroanthus impetiginosus]	GO:0003677(DNA binding);GO:0003700(DNA binding transcription factor activity);GO:0005634(nucleus);GO:0006355(regulation of transcription, DNA-templated);GO:0048653(anther development)	NA
ath-miR156a-5p_R+1	RrubChr5G00135690.1	RrubChr5G00135690	SQUAMOSA promoter binding protein-like 11, partial [Salvia miltiorrhiza]	GO:0003677(DNA binding);GO:0003700(DNA binding transcription factor activity);GO:0005634(nucleus);GO:0005737(cytoplasm);GO:0006351(transcription, DNA-templated);GO:0006355(regulation of transcription, DNA-templated);GO:0010228(vegetative to reproductive phase transition of meristem);GO:0046872(metal ion binding);GO:0048366(leaf development);GO:0048653(anther development);GO:2000025(regulation of …	NA
ath-miR156a-5p_R+1	RrubChr6G00144900.1	RrubChr6G00144900	hypothetical protein CDL12_05376 [Handroanthus impetiginosus]	GO:0003677(DNA binding);GO:0003700(DNA binding transcription factor activity);GO:0005634(nucleus);GO:0006351(transcription, DNA-templated);GO:0006355(regulation of transcription, DNA-templated);GO:0010358(leaf shaping);GO:0045893(positive regulation of transcription, DNA-templated);GO:0046872(metal ion binding);GO:0048510(regulation of timing of transition from vegetative to reproductive phase)	ko04075(Plant hormone signal transduction)
ath-miR156a-5p_R+1	RrubChr6G00157110.1	RrubChr6G00157110	SQUAMOSA promoter binding protein-like 5, partial [Salvia miltiorrhiza]	GO:0003677(DNA binding);GO:0003700(DNA binding transcription factor activity);GO:0005634(nucleus);GO:0006351(transcription, DNA-templated);GO:0006355(regulation of transcription, DNA-templated);GO:0043565(sequence-specific DNA binding);GO:0044212(transcription regulatory region DNA binding);GO:0046872(metal ion binding);GO:0048510(regulation of timing of transition from vegetative to reproductive…	ko04075(Plant hormone signal transduction)
ath-miR156a-5p_R+1	RrubChr7G00176640.1	RrubChr7G00176640	PREDICTED: Werner Syndrome-like exonuclease [Erythranthe guttata]	GO:0005634(nucleus);GO:0005737(cytoplasm);GO:0008408(3'-5' exonuclease activity)	NA
ath-miR156a-5p_R+1	RrubChr8G00196790.1	RrubChr8G00196790	probable sodium/metabolite cotransporter BASS1, chloroplastic [Sesamum indicum]	GO:0005215(transporter activity);GO:0006814(sodium ion transport);GO:0008508(bile acid:sodium symporter activity);GO:0009507(chloroplast);GO:0009941(chloroplast envelope);GO:0016020(membrane);GO:0016021(integral component of membrane)	NA
ath-miR156a-5p_R+1	RrubChr4G00100090.1	RrubChr4G00100090	squamosa promoter-binding-like protein 6 [Sesamum indicum]	GO:0003677(DNA binding);GO:0003700(DNA binding transcription factor activity);GO:0005515(protein binding);GO:0005634(nucleus);GO:0006351(transcription, DNA-templated);GO:0006355(regulation of transcription, DNA-templated);GO:0010468(regulation of gene expression);GO:0042742(defense response to bacterium);GO:0046872(metal ion binding)	ko04075(Plant hormone signal transduction)
ath-miR156a-5p_R+1	RrubChr6G00153990.1	RrubChr6G00153990	hypothetical protein CICLE_v10004755mg [Citrus clementina]	GO:0003924(GTPase activity);GO:0005200(structural constituent of cytoskeleton);GO:0005515(protein binding);GO:0005525(GTP binding);GO:0005737(cytoplasm);GO:0005794(Golgi apparatus);GO:0005874(microtubule);GO:0007017(microtubule-based process);GO:0009651(response to salt stress);GO:0016020(membrane);GO:0045298(tubulin complex)	ko04145(Phagosome)
ath-miR156j_L+1	RrubChr10G00242200.1	RrubChr10G00242200	uncharacterized protein LOC105162332 [Sesamum indicum]	NA	NA
ath-miR156j_L+1	RrubChr11G00267970.1	RrubChr11G00267970	Protein arginine N-methyltransferase PRMT1 [Handroanthus impetiginosus]	GO:0005829(cytosol);GO:0006355(regulation of transcription, DNA-templated);GO:0008469(histone-arginine N-methyltransferase activity);GO:0035242(protein-arginine omega-N asymmetric methyltransferase activity)	NA
ath-miR156j_L+1	RrubChr2G00047450.1	RrubChr2G00047450	Pyruvate kinase [Handroanthus impetiginosus]	GO:0000287(magnesium ion binding);GO:0004743(pyruvate kinase activity);GO:0005737(cytoplasm);GO:0005829(cytosol);GO:0006096(glycolytic process);GO:0016020(membrane);GO:0016301(kinase activity);GO:0030955(potassium ion binding);GO:0046686(response to cadmium ion)	ko00010(Glycolysis / Gluconeogenesis);ko00620(Pyruvate metabolism);ko00230(Purine metabolism)
ath-miR156j_L+1	RrubChr4G00108080.1	RrubChr4G00108080	pentatricopeptide repeat-containing protein At5g46580, chloroplastic [Sesamum indicum]	GO:0003723(RNA binding);GO:0004519(endonuclease activity);GO:0009451(RNA modification);GO:0009507(chloroplast)	ko00500(Starch and sucrose metabolism)
ath-miR156j_L+1	RrubChr5G00135690.1	RrubChr5G00135690	SQUAMOSA promoter binding protein-like 11, partial [Salvia miltiorrhiza]	GO:0003677(DNA binding);GO:0003700(DNA binding transcription factor activity);GO:0005634(nucleus);GO:0005737(cytoplasm);GO:0006351(transcription, DNA-templated);GO:0006355(regulation of transcription, DNA-templated);GO:0010228(vegetative to reproductive phase transition of meristem);GO:0046872(metal ion binding);GO:0048366(leaf development);GO:0048653(anther development);GO:2000025(regulation of …	NA
ath-miR156j_L+1	RrubChr6G00141340.1	RrubChr6G00141340	calcium-transporting ATPase 4, plasma membrane-type [Sesamum indicum]	GO:0005388(calcium-transporting ATPase activity);GO:0005887(integral component of plasma membrane);GO:0043231(intracellular membrane-bounded organelle)	NA
ath-miR156j_L+1	RrubChr6G00157110.1	RrubChr6G00157110	SQUAMOSA promoter binding protein-like 5, partial [Salvia miltiorrhiza]	GO:0003677(DNA binding);GO:0003700(DNA binding transcription factor activity);GO:0005634(nucleus);GO:0006351(transcription, DNA-templated);GO:0006355(regulation of transcription, DNA-templated);GO:0043565(sequence-specific DNA binding);GO:0044212(transcription regulatory region DNA binding);GO:0046872(metal ion binding);GO:0048510(regulation of timing of transition from vegetative to reproductive…	ko04075(Plant hormone signal transduction)
ath-miR156j_L+1	RrubChr9G00222910.1	RrubChr9G00222910	Serine palmitoyltransferase [Handroanthus impetiginosus]	GO:0003824(catalytic activity);GO:0004758(serine C-palmitoyltransferase activity);GO:0005515(protein binding);GO:0005783(endoplasmic reticulum);GO:0005789(endoplasmic reticulum membrane);GO:0009058(biosynthetic process);GO:0009507(chloroplast);GO:0009793(embryo development ending in seed dormancy);GO:0009825(multidimensional cell growth);GO:0016021(integral component of membrane);GO:0030148(sphin…	ko00600(Sphingolipid metabolism)
ath-miR156j_L+1	RrubChr10G00245790.1	RrubChr10G00245790	ribosome-binding factor PSRP1, chloroplastic [Sesamum indicum]	GO:0003735(structural constituent of ribosome);GO:0005840(ribosome);GO:0006412(translation);GO:0009507(chloroplast);GO:0009534(chloroplast thylakoid);GO:0009570(chloroplast stroma)	NA
ath-miR156j_L+1	RrubChr10G00250740.1	RrubChr10G00250740	mediator of RNA polymerase II transcription subunit 25-like isoform X1 [Sesamum indicum]	GO:0003677(DNA binding);GO:0003713(transcription coactivator activity);GO:0005515(protein binding);GO:0005575(cellular_component);GO:0005634(nucleus);GO:0006351(transcription, DNA-templated);GO:0009585(red, far-red light phototransduction);GO:0009867(jasmonic acid mediated signaling pathway);GO:0009908(flower development);GO:0009909(regulation of flower development);GO:0009911(positive regulation…	NA
ath-miR156j_L+1	RrubChr3G00066830.1	RrubChr3G00066830	Magnesium chelatase [Handroanthus impetiginosus]	GO:0005524(ATP binding);GO:0005618(cell wall);GO:0009507(chloroplast);GO:0009570(chloroplast stroma);GO:0009735(response to cytokinin);GO:0010007(magnesium chelatase complex);GO:0015979(photosynthesis);GO:0015995(chlorophyll biosynthetic process);GO:0016851(magnesium chelatase activity);GO:0016887(ATPase activity)	ko00860(Porphyrin and chlorophyll metabolism)
ath-miR156j_L+1	RrubChr3G00075800.1	RrubChr3G00075800	subtilisin-like protease SBT1.4 [Sesamum indicum]	GO:0004252(serine-type endopeptidase activity);GO:0005618(cell wall)	NA
ath-miR156j_L+1	RrubChr5G00131340.1	RrubChr5G00131340	uncharacterized protein LOC105173554 [Sesamum indicum]	GO:0006679(glucosylceramide biosynthetic process);GO:0008120(ceramide glucosyltransferase activity);GO:0016020(membrane)	NA
ath-miR156j_L+1_1ss15AT	RrubChr10G00242200.1	RrubChr10G00242200	uncharacterized protein LOC105162332 [Sesamum indicum]	NA	NA
ath-miR156j_L+1_1ss15AT	RrubChr11G00267970.1	RrubChr11G00267970	Protein arginine N-methyltransferase PRMT1 [Handroanthus impetiginosus]	GO:0005829(cytosol);GO:0006355(regulation of transcription, DNA-templated);GO:0008469(histone-arginine N-methyltransferase activity);GO:0035242(protein-arginine omega-N asymmetric methyltransferase activity)	NA
ath-miR156j_L+1_1ss15AT	RrubChr11G00270760.1	RrubChr11G00270760	tRNA delta(2)-isopentenylpyrophosphate transferase [Handroanthus impetiginosus]	GO:0005739(mitochondrion);GO:0006400(tRNA modification);GO:0052381(tRNA dimethylallyltransferase activity)	ko00908(Zeatin biosynthesis)
ath-miR156j_L+1_1ss15AT	RrubChr1G00015750.1	RrubChr1G00015750	Histone acetyltransferase [Handroanthus impetiginosus]	GO:0003677(DNA binding);GO:0005634(nucleus);GO:0006355(regulation of transcription, DNA-templated)	NA
ath-miR156j_L+1_1ss15AT	RrubChr3G00075420.1	RrubChr3G00075420	phosphoinositide phosphatase SAC2 [Sesamum indicum]	GO:0004439(phosphatidylinositol-4,5-bisphosphate 5-phosphatase activity);GO:0005634(nucleus);GO:0005774(vacuolar membrane);GO:0007033(vacuole organization);GO:0036092(phosphatidylinositol-3-phosphate biosynthetic process);GO:0042578(phosphoric ester hydrolase activity)	ko00562(Inositol phosphate metabolism);ko04070(Phosphatidylinositol signaling system)
ath-miR156j_L+1_1ss15AT	RrubChr5G00135690.1	RrubChr5G00135690	SQUAMOSA promoter binding protein-like 11, partial [Salvia miltiorrhiza]	GO:0003677(DNA binding);GO:0003700(DNA binding transcription factor activity);GO:0005634(nucleus);GO:0005737(cytoplasm);GO:0006351(transcription, DNA-templated);GO:0006355(regulation of transcription, DNA-templated);GO:0010228(vegetative to reproductive phase transition of meristem);GO:0046872(metal ion binding);GO:0048366(leaf development);GO:0048653(anther development);GO:2000025(regulation of …	NA
ath-miR156j_L+1_1ss15AT	RrubChr6G00157110.1	RrubChr6G00157110	SQUAMOSA promoter binding protein-like 5, partial [Salvia miltiorrhiza]	GO:0003677(DNA binding);GO:0003700(DNA binding transcription factor activity);GO:0005634(nucleus);GO:0006351(transcription, DNA-templated);GO:0006355(regulation of transcription, DNA-templated);GO:0043565(sequence-specific DNA binding);GO:0044212(transcription regulatory region DNA binding);GO:0046872(metal ion binding);GO:0048510(regulation of timing of transition from vegetative to reproductive…	ko04075(Plant hormone signal transduction)
ath-miR156j_L+1_1ss15AT	RrubChr8G00196790.1	RrubChr8G00196790	probable sodium/metabolite cotransporter BASS1, chloroplastic [Sesamum indicum]	GO:0005215(transporter activity);GO:0006814(sodium ion transport);GO:0008508(bile acid:sodium symporter activity);GO:0009507(chloroplast);GO:0009941(chloroplast envelope);GO:0016020(membrane);GO:0016021(integral component of membrane)	NA
ath-miR156j_L+1_1ss15AT	RrubChr8G00204210.1	RrubChr8G00204210	elongation factor 2-like [Sesamum indicum]	GO:0003924(GTPase activity);GO:0005622(intracellular);GO:0006412(translation)	NA
ath-miR156j_L+1_1ss15AT	RrubChr10G00250740.1	RrubChr10G00250740	mediator of RNA polymerase II transcription subunit 25-like isoform X1 [Sesamum indicum]	GO:0003677(DNA binding);GO:0003713(transcription coactivator activity);GO:0005515(protein binding);GO:0005575(cellular_component);GO:0005634(nucleus);GO:0006351(transcription, DNA-templated);GO:0009585(red, far-red light phototransduction);GO:0009867(jasmonic acid mediated signaling pathway);GO:0009908(flower development);GO:0009909(regulation of flower development);GO:0009911(positive regulation…	NA
ath-miR156j_L+1_1ss15AT	RrubChr3G00066830.1	RrubChr3G00066830	Magnesium chelatase [Handroanthus impetiginosus]	GO:0005524(ATP binding);GO:0005618(cell wall);GO:0009507(chloroplast);GO:0009570(chloroplast stroma);GO:0009735(response to cytokinin);GO:0010007(magnesium chelatase complex);GO:0015979(photosynthesis);GO:0015995(chlorophyll biosynthetic process);GO:0016851(magnesium chelatase activity);GO:0016887(ATPase activity)	ko00860(Porphyrin and chlorophyll metabolism)
ath-miR157a-5p_2ss12TG20AC	RrubChr10G00242200.1	RrubChr10G00242200	uncharacterized protein LOC105162332 [Sesamum indicum]	NA	NA
ath-miR157a-5p_2ss12TG20AC	RrubChr10G00245960.1	RrubChr10G00245960	pleiotropic drug resistance protein 2 [Sesamum indicum]	GO:0005886(plasma membrane);GO:0016021(integral component of membrane);GO:0042626(ATPase activity, coupled to transmembrane movement of substances)	ko02010(ABC transporters)
ath-miR157a-5p_2ss12TG20AC	RrubChr11G00267970.1	RrubChr11G00267970	Protein arginine N-methyltransferase PRMT1 [Handroanthus impetiginosus]	GO:0005829(cytosol);GO:0006355(regulation of transcription, DNA-templated);GO:0008469(histone-arginine N-methyltransferase activity);GO:0035242(protein-arginine omega-N asymmetric methyltransferase activity)	NA
ath-miR157a-5p_2ss12TG20AC	RrubChr1G00007380.1	RrubChr1G00007380	ubiquitin receptor RAD23c-like [Sesamum indicum]	GO:0003684(damaged DNA binding);GO:0005515(protein binding);GO:0005634(nucleus);GO:0005737(cytoplasm);GO:0006289(nucleotide-excision repair);GO:0031593(polyubiquitin modification-dependent protein binding);GO:0043130(ubiquitin binding);GO:0043161(proteasome-mediated ubiquitin-dependent protein catabolic process);GO:0070628(proteasome binding)	ko04141(Protein processing in endoplasmic reticulum);ko03420(Nucleotide excision repair)
ath-miR157a-5p_2ss12TG20AC	RrubChr2G00047450.1	RrubChr2G00047450	Pyruvate kinase [Handroanthus impetiginosus]	GO:0000287(magnesium ion binding);GO:0004743(pyruvate kinase activity);GO:0005737(cytoplasm);GO:0005829(cytosol);GO:0006096(glycolytic process);GO:0016020(membrane);GO:0016301(kinase activity);GO:0030955(potassium ion binding);GO:0046686(response to cadmium ion)	ko00010(Glycolysis / Gluconeogenesis);ko00620(Pyruvate metabolism);ko00230(Purine metabolism)
ath-miR157a-5p_2ss12TG20AC	RrubChr3G00074260.1	RrubChr3G00074260	uncharacterized protein LOC105157153 [Sesamum indicum]	GO:0005634(nucleus)	ko03018(RNA degradation)
ath-miR157a-5p_2ss12TG20AC	RrubChr4G00091160.1	RrubChr4G00091160	hypothetical protein CDL12_28897 [Handroanthus impetiginosus]	GO:0003674(molecular_function);GO:0005634(nucleus);GO:0005886(plasma membrane);GO:0009642(response to light intensity)	NA
ath-miR157a-5p_2ss12TG20AC	RrubChr5G00119830.1	RrubChr5G00119830	putative lipase YOR059C [Sesamum indicum]	GO:0044255(cellular lipid metabolic process);GO:0052689(carboxylic ester hydrolase activity)	ko00040(Pentose and glucuronate interconversions);ko00051(Fructose and mannose metabolism)
ath-miR157a-5p_2ss12TG20AC	RrubChr5G00135400.1	RrubChr5G00135400	calcium-dependent protein kinase 32 [Sesamum indicum]	GO:0004683(calmodulin-dependent protein kinase activity);GO:0005516(calmodulin binding);GO:0005634(nucleus);GO:0005737(cytoplasm);GO:0005886(plasma membrane);GO:0009738(abscisic acid-activated signaling pathway);GO:0009931(calcium-dependent protein serine/threonine kinase activity);GO:0018105(peptidyl-serine phosphorylation);GO:0035556(intracellular signal transduction);GO:0046777(protein autopho…	ko04626(Plant-pathogen interaction)
ath-miR157a-5p_2ss12TG20AC	RrubChr5G00135690.1	RrubChr5G00135690	SQUAMOSA promoter binding protein-like 11, partial [Salvia miltiorrhiza]	GO:0003677(DNA binding);GO:0003700(DNA binding transcription factor activity);GO:0005634(nucleus);GO:0005737(cytoplasm);GO:0006351(transcription, DNA-templated);GO:0006355(regulation of transcription, DNA-templated);GO:0010228(vegetative to reproductive phase transition of meristem);GO:0046872(metal ion binding);GO:0048366(leaf development);GO:0048653(anther development);GO:2000025(regulation of …	NA
ath-miR157a-5p_2ss12TG20AC	RrubChr6G00147110.1	RrubChr6G00147110	exocyst complex component EXO70A1-like [Sesamum indicum]	GO:0000145(exocyst);GO:0005737(cytoplasm);GO:0005829(cytosol);GO:0006887(exocytosis);GO:0006904(vesicle docking involved in exocytosis)	NA
ath-miR157a-5p_2ss12TG20AC	RrubChr6G00157110.1	RrubChr6G00157110	SQUAMOSA promoter binding protein-like 5, partial [Salvia miltiorrhiza]	GO:0003677(DNA binding);GO:0003700(DNA binding transcription factor activity);GO:0005634(nucleus);GO:0006351(transcription, DNA-templated);GO:0006355(regulation of transcription, DNA-templated);GO:0043565(sequence-specific DNA binding);GO:0044212(transcription regulatory region DNA binding);GO:0046872(metal ion binding);GO:0048510(regulation of timing of transition from vegetative to reproductive…	ko04075(Plant hormone signal transduction)
ath-miR157a-5p_2ss12TG20AC	RrubChr7G00172990.1	RrubChr7G00172990	PREDICTED: cytochrome P450 CYP82D47-like [Erythranthe guttata]	GO:0016020(membrane);GO:0016709(oxidoreductase activity, acting on paired donors, with incorporation or reduction of molecular oxygen, NAD(P)H as one donor, and incorporation of one atom of oxygen);GO:0044550(secondary metabolite biosynthetic process)	NA
ath-miR157a-5p_2ss12TG20AC	RrubChr9G00231680.1	RrubChr9G00231680	uncharacterized protein LOC105164832 [Sesamum indicum]	GO:0003674(molecular_function);GO:0005576(extracellular region);GO:0005618(cell wall);GO:0008150(biological_process);GO:0009505(plant-type cell wall)	ko03008(Ribosome biogenesis in eukaryotes);ko04712(Circadian rhythm - plant)
ath-miR157a-5p_2ss12TG20AC	RrubChr10G00245790.1	RrubChr10G00245790	ribosome-binding factor PSRP1, chloroplastic [Sesamum indicum]	GO:0003735(structural constituent of ribosome);GO:0005840(ribosome);GO:0006412(translation);GO:0009507(chloroplast);GO:0009534(chloroplast thylakoid);GO:0009570(chloroplast stroma)	NA
ath-miR157a-5p_2ss12TG20AC	RrubChr3G00066830.1	RrubChr3G00066830	Magnesium chelatase [Handroanthus impetiginosus]	GO:0005524(ATP binding);GO:0005618(cell wall);GO:0009507(chloroplast);GO:0009570(chloroplast stroma);GO:0009735(response to cytokinin);GO:0010007(magnesium chelatase complex);GO:0015979(photosynthesis);GO:0015995(chlorophyll biosynthetic process);GO:0016851(magnesium chelatase activity);GO:0016887(ATPase activity)	ko00860(Porphyrin and chlorophyll metabolism)
ath-miR157a-5p_2ss12TG20AC	RrubChr3G00075800.1	RrubChr3G00075800	subtilisin-like protease SBT1.4 [Sesamum indicum]	GO:0004252(serine-type endopeptidase activity);GO:0005618(cell wall)	NA
ath-miR157a-5p_2ss12TG20AC	RrubChr5G00131340.1	RrubChr5G00131340	uncharacterized protein LOC105173554 [Sesamum indicum]	GO:0006679(glucosylceramide biosynthetic process);GO:0008120(ceramide glucosyltransferase activity);GO:0016020(membrane)	NA
ath-miR157a-5p_2ss12TG20AC	RrubChr9G00213310.1	RrubChr9G00213310	probable LRR receptor-like serine/threonine-protein kinase At1g06840 isoform X1 [Sesamum indicum]	GO:0004674(protein serine/threonine kinase activity);GO:0005524(ATP binding);GO:0005886(plasma membrane);GO:0006468(protein phosphorylation);GO:0007169(transmembrane receptor protein tyrosine kinase signaling pathway);GO:0009507(chloroplast);GO:0009755(hormone-mediated signaling pathway);GO:0016301(kinase activity)	NA
ath-miR157d_L+1	RrubChr10G00242200.1	RrubChr10G00242200	uncharacterized protein LOC105162332 [Sesamum indicum]	NA	NA
ath-miR157d_L+1	RrubChr3G00075420.1	RrubChr3G00075420	phosphoinositide phosphatase SAC2 [Sesamum indicum]	GO:0004439(phosphatidylinositol-4,5-bisphosphate 5-phosphatase activity);GO:0005634(nucleus);GO:0005774(vacuolar membrane);GO:0007033(vacuole organization);GO:0036092(phosphatidylinositol-3-phosphate biosynthetic process);GO:0042578(phosphoric ester hydrolase activity)	ko00562(Inositol phosphate metabolism);ko04070(Phosphatidylinositol signaling system)
ath-miR157d_L+1	RrubChr4G00090430.1	RrubChr4G00090430	putative transcription elongation factor SPT5 homolog 1 [Sesamum indicum]	GO:0004190(aspartic-type endopeptidase activity);GO:0006508(proteolysis);GO:0030163(protein catabolic process)	NA
ath-miR157d_L+1	RrubChr4G00090450.1	RrubChr4G00090450	putative membrane protein [Handroanthus impetiginosus]	GO:0000023(maltose metabolic process);GO:0005363(maltose transmembrane transporter activity);GO:0005975(carbohydrate metabolic process);GO:0005983(starch catabolic process);GO:0007154(cell communication);GO:0007275(multicellular organism development);GO:0009507(chloroplast);GO:0009624(response to nematode);GO:0009629(response to gravity);GO:0009706(chloroplast inner membrane);GO:0009941(chloropla…	NA
ath-miR157d_L+1	RrubChr4G00094860.1	RrubChr4G00094860	calcium-transporting ATPase 1, chloroplastic [Sesamum indicum]	GO:0005388(calcium-transporting ATPase activity);GO:0005887(integral component of plasma membrane);GO:0043231(intracellular membrane-bounded organelle)	NA
ath-miR157d_L+1	RrubChr5G00130020.1	RrubChr5G00130020	12-oxophytodienoate reductase 3 [Sesamum indicum]	GO:0003959(NADPH dehydrogenase activity);GO:0005777(peroxisome);GO:0009695(jasmonic acid biosynthetic process);GO:0016629(12-oxophytodienoate reductase activity);GO:0031408(oxylipin biosynthetic process)	ko00592(alpha-Linolenic acid metabolism)
ath-miR157d_L+1	RrubChr5G00135690.1	RrubChr5G00135690	SQUAMOSA promoter binding protein-like 11, partial [Salvia miltiorrhiza]	GO:0003677(DNA binding);GO:0003700(DNA binding transcription factor activity);GO:0005634(nucleus);GO:0005737(cytoplasm);GO:0006351(transcription, DNA-templated);GO:0006355(regulation of transcription, DNA-templated);GO:0010228(vegetative to reproductive phase transition of meristem);GO:0046872(metal ion binding);GO:0048366(leaf development);GO:0048653(anther development);GO:2000025(regulation of …	NA
ath-miR157d_L+1	RrubChr6G00157110.1	RrubChr6G00157110	SQUAMOSA promoter binding protein-like 5, partial [Salvia miltiorrhiza]	GO:0003677(DNA binding);GO:0003700(DNA binding transcription factor activity);GO:0005634(nucleus);GO:0006351(transcription, DNA-templated);GO:0006355(regulation of transcription, DNA-templated);GO:0043565(sequence-specific DNA binding);GO:0044212(transcription regulatory region DNA binding);GO:0046872(metal ion binding);GO:0048510(regulation of timing of transition from vegetative to reproductive…	ko04075(Plant hormone signal transduction)
ath-miR157d_L+1	RrubChr9G00225540.1	RrubChr9G00225540	calcium-transporting ATPase 10, plasma membrane-type isoform X1 [Sesamum indicum]	GO:0005388(calcium-transporting ATPase activity);GO:0005887(integral component of plasma membrane);GO:0043231(intracellular membrane-bounded organelle)	NA
ath-miR157d_L+1	RrubChr1G00028310.1	RrubChr1G00028310	Cl- channel CLC-3 and related proteins (CLC superfamily) [Handroanthus impetiginosus]	GO:0005247(voltage-gated chloride channel activity);GO:0005794(Golgi apparatus);GO:0005886(plasma membrane);GO:0006821(chloride transport);GO:0009507(chloroplast);GO:0016020(membrane);GO:0034707(chloride channel complex);GO:0034765(regulation of ion transmembrane transport)	NA
ath-miR159a	RrubChr10G00246660.1	RrubChr10G00246660	GDP-mannose 3,5-epimerase 2 [Sesamum indicum]	GO:0003824(catalytic activity);GO:0005737(cytoplasm);GO:0005829(cytosol);GO:0009225(nucleotide-sugar metabolic process);GO:0019853(L-ascorbic acid biosynthetic process);GO:0047918(GDP-mannose 3,5-epimerase activity);GO:0051287(NAD binding)	ko00053(Ascorbate and aldarate metabolism);ko00520(Amino sugar and nucleotide sugar metabolism)
ath-miR159a	RrubChr11G00266180.1	RrubChr11G00266180	MYB transcription factor 4 [Tectona grandis]	GO:0000981(RNA polymerase II transcription factor activity, sequence-specific DNA binding);GO:0001135(transcription factor activity, RNA polymerase II transcription factor recruiting);GO:0003677(DNA binding);GO:0003700(DNA binding transcription factor activity);GO:0005634(nucleus);GO:0006351(transcription, DNA-templated);GO:0006355(regulation of transcription, DNA-templated);GO:0006357(regulation…	NA
ath-miR159a	RrubChr11G00268130.1	RrubChr11G00268130	MYB-related transcription factor [Salvia miltiorrhiza]	GO:0000981(RNA polymerase II transcription factor activity, sequence-specific DNA binding);GO:0001135(transcription factor activity, RNA polymerase II transcription factor recruiting);GO:0003677(DNA binding);GO:0003700(DNA binding transcription factor activity);GO:0005634(nucleus);GO:0006351(transcription, DNA-templated);GO:0006355(regulation of transcription, DNA-templated);GO:0006357(regulation…	NA
ath-miR159a	RrubChr11G00270760.1	RrubChr11G00270760	tRNA delta(2)-isopentenylpyrophosphate transferase [Handroanthus impetiginosus]	GO:0005739(mitochondrion);GO:0006400(tRNA modification);GO:0052381(tRNA dimethylallyltransferase activity)	ko00908(Zeatin biosynthesis)
ath-miR159a	RrubChr11G00271600.1	RrubChr11G00271600	PREDICTED: uncharacterized protein LOC105961976 [Erythranthe guttata]	NA	NA
ath-miR159a	RrubChr1G00001500.1	RrubChr1G00001500	transcription factor TCP2-like [Sesamum indicum]	GO:0003677(DNA binding);GO:0003700(DNA binding transcription factor activity);GO:0005515(protein binding);GO:0005634(nucleus);GO:0006351(transcription, DNA-templated);GO:0006355(regulation of transcription, DNA-templated);GO:0009637(response to blue light);GO:0009965(leaf morphogenesis);GO:0030154(cell differentiation);GO:0045962(positive regulation of development, heterochronic);GO:0048366(leaf …	NA
ath-miR159a	RrubChr2G00056540.1	RrubChr2G00056540	peptide chain release factor PrfB1, chloroplastic [Sesamum indicum]	GO:0016149(translation release factor activity, codon specific);GO:0043022(ribosome binding)	NA
ath-miR159a	RrubChr3G00063760.1	RrubChr3G00063760	transcription factor TCP4-like [Sesamum indicum]	GO:0003677(DNA binding);GO:0003700(DNA binding transcription factor activity);GO:0005515(protein binding);GO:0005634(nucleus);GO:0006351(transcription, DNA-templated);GO:0006355(regulation of transcription, DNA-templated);GO:0009793(embryo development ending in seed dormancy);GO:0009965(leaf morphogenesis);GO:0010150(leaf senescence);GO:0030154(cell differentiation);GO:0045962(positive regulation…	NA
ath-miR159a	RrubChr5G00124600.1	RrubChr5G00124600	hypothetical protein MIMGU_mgv1a005762mg [Erythranthe guttata]	GO:0003677(DNA binding);GO:0003700(DNA binding transcription factor activity);GO:0005515(protein binding);GO:0005634(nucleus);GO:0006351(transcription, DNA-templated);GO:0006355(regulation of transcription, DNA-templated);GO:0009637(response to blue light);GO:0009965(leaf morphogenesis);GO:0030154(cell differentiation);GO:0045962(positive regulation of development, heterochronic);GO:0048366(leaf …	NA
ath-miR159a	RrubChr8G00196540.1	RrubChr8G00196540	hypothetical protein MIMGU_mgv1a005129mg [Erythranthe guttata]	GO:0004497(monooxygenase activity)	NA
ath-miR159a	RrubChr8G00200100.1	RrubChr8G00200100	WAS/WASL-interacting protein family member 1 isoform X1 [Sesamum indicum]	NA	ko04144(Endocytosis)
ath-miR159a	RrubChr8G00200150.1	RrubChr8G00200150	transcription factor TCP4-like [Sesamum indicum]	GO:0003677(DNA binding);GO:0003700(DNA binding transcription factor activity);GO:0005515(protein binding);GO:0005634(nucleus);GO:0006351(transcription, DNA-templated);GO:0006355(regulation of transcription, DNA-templated);GO:0009793(embryo development ending in seed dormancy);GO:0009965(leaf morphogenesis);GO:0010150(leaf senescence);GO:0030154(cell differentiation);GO:0045962(positive regulation…	NA
ath-miR159a	RrubChr5G00128630.1	RrubChr5G00128630	arogenate dehydrogenase 2, chloroplastic [Sesamum indicum]	GO:0004665(prephenate dehydrogenase (NADP+) activity);GO:0006571(tyrosine biosynthetic process);GO:0008977(prephenate dehydrogenase (NAD+) activity);GO:0009507(chloroplast);GO:0033730(arogenate dehydrogenase (NADP+) activity);GO:0055114(oxidation-reduction process)	ko00400(Phenylalanine, tyrosine and tryptophan biosynthesis)
ath-miR159a	RrubChr8G00193360.1	RrubChr8G00193360	MYB-related transcription factor [Salvia miltiorrhiza]	GO:0000981(RNA polymerase II transcription factor activity, sequence-specific DNA binding);GO:0001135(transcription factor activity, RNA polymerase II transcription factor recruiting);GO:0003677(DNA binding);GO:0003700(DNA binding transcription factor activity);GO:0005634(nucleus);GO:0006351(transcription, DNA-templated);GO:0006355(regulation of transcription, DNA-templated);GO:0006357(regulation…	NA
ath-miR159a	RrubChr8G00208770.1	RrubChr8G00208770	dof zinc finger protein DOF3.1 [Sesamum indicum]	GO:0003677(DNA binding);GO:0003700(DNA binding transcription factor activity);GO:0005634(nucleus);GO:0006351(transcription, DNA-templated);GO:0006355(regulation of transcription, DNA-templated);GO:0046872(metal ion binding)	NA
ath-miR160a-5p_L-2R+2	RrubChr10G00235320.1	RrubChr10G00235320	ATP-dependent Clp protease proteolytic subunit 5, chloroplastic-like [Olea europaea var. sylvestris]	GO:0004252(serine-type endopeptidase activity);GO:0006508(proteolysis);GO:0009507(chloroplast);GO:0009532(plastid stroma);GO:0009534(chloroplast thylakoid);GO:0009570(chloroplast stroma);GO:0009579(thylakoid);GO:0009840(chloroplastic endopeptidase Clp complex);GO:0009941(chloroplast envelope)	NA
ath-miR160a-5p_L-2R+2	RrubChr11G00262500.1	RrubChr11G00262500	auxin response factor ARF1 [Salvia miltiorrhiza]	GO:0003677(DNA binding);GO:0003700(DNA binding transcription factor activity);GO:0005634(nucleus);GO:0006351(transcription, DNA-templated);GO:0006355(regulation of transcription, DNA-templated);GO:0007389(pattern specification process);GO:0009734(auxin-activated signaling pathway);GO:0009738(abscisic acid-activated signaling pathway);GO:0009743(response to carbohydrate);GO:0010154(fruit developme…	ko04075(Plant hormone signal transduction)
ath-miR160a-5p_L-2R+2	RrubChr3G00060710.1	RrubChr3G00060710	soluble starch synthase 1, chloroplastic/amyloplastic [Sesamum indicum]	GO:0004373(glycogen (starch) synthase activity);GO:0005739(mitochondrion);GO:0009011(starch synthase activity);GO:0009501(amyloplast);GO:0009507(chloroplast);GO:0009570(chloroplast stroma);GO:0010021(amylopectin biosynthetic process);GO:0016757(transferase activity, transferring glycosyl groups);GO:0019252(starch biosynthetic process);GO:0033201(alpha-1,4-glucan synthase activity)	ko00500(Starch and sucrose metabolism)
ath-miR160a-5p_L-2R+2	RrubChr3G00062140.1	RrubChr3G00062140	sugar carrier protein C [Sesamum indicum]	GO:0005351(carbohydrate:proton symporter activity);GO:0005355(glucose transmembrane transporter activity);GO:0005887(integral component of plasma membrane);GO:0046323(glucose import)	NA
ath-miR160a-5p_L-2R+2	RrubChr6G00161940.1	RrubChr6G00161940	PREDICTED: pyruvate dehydrogenase E1 component subunit alpha-3, chloroplastic [Erythranthe guttata]	GO:0004739(pyruvate dehydrogenase (acetyl-transferring) activity);GO:0005739(mitochondrion);GO:0005829(cytosol);GO:0006086(acetyl-CoA biosynthetic process from pyruvate);GO:0006096(glycolytic process);GO:0009507(chloroplast);GO:0009536(plastid);GO:0009570(chloroplast stroma);GO:0009941(chloroplast envelope);GO:0055114(oxidation-reduction process)	ko00010(Glycolysis / Gluconeogenesis);ko00020(Citrate cycle (TCA cycle));ko00620(Pyruvate metabolism)
ath-miR160a-5p_L-2R+2	RrubChr7G00175900.1	RrubChr7G00175900	dCTP pyrophosphatase 1-like [Sesamum indicum]	GO:0005737(cytoplasm);GO:0009143(nucleoside triphosphate catabolic process);GO:0046872(metal ion binding);GO:0047429(nucleoside-triphosphate diphosphatase activity)	ko00240(Pyrimidine metabolism)
ath-miR160a-5p_L-2R+2	RrubChr9G00215210.1	RrubChr9G00215210	Exocyst component protein [Handroanthus impetiginosus]	GO:0000145(exocyst);GO:0005515(protein binding);GO:0005737(cytoplasm);GO:0005829(cytosol);GO:0005886(plasma membrane);GO:0006887(exocytosis);GO:0006904(vesicle docking involved in exocytosis);GO:0009414(response to water deprivation);GO:0009789(positive regulation of abscisic acid-activated signaling pathway);GO:0012505(endomembrane system);GO:0042742(defense response to bacterium);GO:0045335(pha…	NA
ath-miR162a-5p_L-1_1ss21TC	RrubChr2G00033510.1	RrubChr2G00033510	hypothetical protein CDL12_23643 [Handroanthus impetiginosus]	GO:0003723(RNA binding);GO:0004519(endonuclease activity);GO:0005515(protein binding);GO:0005739(mitochondrion);GO:0006397(mRNA processing);GO:0008380(RNA splicing);GO:0009507(chloroplast);GO:1900865(chloroplast RNA modification)	ko00500(Starch and sucrose metabolism)
ath-miR162a-5p_L-1_1ss21TC	RrubChr2G00050580.1	RrubChr2G00050580	PREDICTED: histone H2B [Ipomoea nil]	GO:0000788(nuclear nucleosome);GO:0003677(DNA binding);GO:0006334(nucleosome assembly)	NA
ath-miR162a-5p_L-1_1ss21TC	RrubChr4G00101130.1	RrubChr4G00101130	heat stress transcription factor A-8 [Sesamum indicum]	GO:0003677(DNA binding);GO:0003700(DNA binding transcription factor activity);GO:0005634(nucleus);GO:0005737(cytoplasm);GO:0006351(transcription, DNA-templated);GO:0006355(regulation of transcription, DNA-templated);GO:0043565(sequence-specific DNA binding)	NA
ath-miR162a-5p_L-1_1ss21TC	RrubChr6G00143170.1	RrubChr6G00143170	Iron/ascorbate family oxidoreductase [Handroanthus impetiginosus]	GO:0051213(dioxygenase activity)	ko00230(Purine metabolism)
ath-miR162a-5p_L-1_1ss21TC	RrubChr6G00156470.1	RrubChr6G00156470	PREDICTED: uncharacterized protein LOC105968129 [Erythranthe guttata]	GO:0003674(molecular_function);GO:0008150(biological_process);GO:0009507(chloroplast);GO:0016021(integral component of membrane)	NA
ath-miR162a-5p_L-1_1ss21TC	RrubChr7G00182970.1	RrubChr7G00182970	WRKY DNA-binding protein 7 isoform 1 [Dorcoceras hygrometricum]	GO:0003700(DNA binding transcription factor activity);GO:0005516(calmodulin binding);GO:0005634(nucleus);GO:0006351(transcription, DNA-templated);GO:0006355(regulation of transcription, DNA-templated);GO:0043565(sequence-specific DNA binding)	ko04016(MAPK signaling pathway - plant);ko04626(Plant-pathogen interaction)
ath-miR162a-5p_L-1_1ss21TC	RrubChr8G00196070.1	RrubChr8G00196070	polyphenol oxidase I, chloroplastic-like [Sesamum indicum]	GO:0004503(monophenol monooxygenase activity);GO:0036263(L-DOPA monooxygenase activity)	ko00350(Tyrosine metabolism);ko00950(Isoquinoline alkaloid biosynthesis)
ath-miR162a-5p_L-1_1ss21TC	RrubChr8G00196150.1	RrubChr8G00196150	Pyruvate Dehydrogenase beta subunit [Salvia miltiorrhiza]	GO:0004739(pyruvate dehydrogenase (acetyl-transferring) activity);GO:0004802(transketolase activity);GO:0006096(glycolytic process);GO:0008270(zinc ion binding);GO:0009507(chloroplast);GO:0009941(chloroplast envelope);GO:0048868(pollen tube development);GO:0055114(oxidation-reduction process)	ko00010(Glycolysis / Gluconeogenesis);ko00020(Citrate cycle (TCA cycle));ko00620(Pyruvate metabolism)
ath-miR162a-5p_L-1_1ss21TC	RrubChr11G00261030.1	RrubChr11G00261030	PREDICTED: UDP-glucuronic acid decarboxylase 2-like [Erythranthe guttata]	GO:0000139(Golgi membrane);GO:0003824(catalytic activity);GO:0005768(endosome);GO:0005794(Golgi apparatus);GO:0005802(trans-Golgi network);GO:0005829(cytosol);GO:0005886(plasma membrane);GO:0008460(dTDP-glucose 4,6-dehydratase activity);GO:0009225(nucleotide-sugar metabolic process);GO:0016020(membrane);GO:0016021(integral component of membrane);GO:0019305(dTDP-rhamnose biosynthetic process);GO:0…	ko00520(Amino sugar and nucleotide sugar metabolism)
ath-miR162a-5p_L-1_1ss21TC	RrubChr12G00300870.1	RrubChr12G00300870	NADPH-dependent pterin aldehyde reductase isoform X2 [Sesamum indicum]	GO:0005829(cytosol);GO:0006760(folic acid-containing compound metabolic process);GO:0009507(chloroplast);GO:0016491(oxidoreductase activity);GO:0016616(oxidoreductase activity, acting on the CH-OH group of donors, NAD or NADP as acceptor);GO:0055114(oxidation-reduction process)	ko00061(Fatty acid biosynthesis);ko01040(Biosynthesis of unsaturated fatty acids);ko00780(Biotin metabolism);ko00333(Prodigiosin biosyntheses)
ath-miR164a_1ss21AT	RrubChr10G00236890.1	RrubChr10G00236890	uncharacterized protein LOC105173120 [Sesamum indicum]	GO:0003674(molecular_function);GO:0005886(plasma membrane);GO:0008150(biological_process);GO:0016021(integral component of membrane)	NA
ath-miR164a_1ss21AT	RrubChr11G00260240.1	RrubChr11G00260240	hypothetical protein CDL12_21652 [Handroanthus impetiginosus]	GO:0003674(molecular_function);GO:0005783(endoplasmic reticulum);GO:0008150(biological_process);GO:0009507(chloroplast)	NA
ath-miR164a_1ss21AT	RrubChr11G00278270.1	RrubChr11G00278270	NAC domain-containing protein 79 [Sesamum indicum]	GO:0003677(DNA binding);GO:0003700(DNA binding transcription factor activity);GO:0005634(nucleus);GO:0006351(transcription, DNA-templated);GO:0006355(regulation of transcription, DNA-templated);GO:0007275(multicellular organism development)	ko03013(RNA transport);ko03015(mRNA surveillance pathway);ko03018(RNA degradation)
ath-miR164a_1ss21AT	RrubChr2G00041650.1	RrubChr2G00041650	NAC domain-containing protein 100-like [Coffea arabica]	GO:0003677(DNA binding);GO:0003700(DNA binding transcription factor activity);GO:0005634(nucleus);GO:0006351(transcription, DNA-templated);GO:0006355(regulation of transcription, DNA-templated);GO:0007275(multicellular organism development)	ko03013(RNA transport);ko03015(mRNA surveillance pathway);ko03018(RNA degradation)
ath-miR164a_1ss21AT	RrubChr3G00072870.1	RrubChr3G00072870	NAC domain-containing protein 79 [Sesamum indicum]	GO:0003677(DNA binding);GO:0003700(DNA binding transcription factor activity);GO:0005634(nucleus);GO:0006351(transcription, DNA-templated);GO:0006355(regulation of transcription, DNA-templated);GO:0007275(multicellular organism development)	ko03013(RNA transport);ko03015(mRNA surveillance pathway);ko03018(RNA degradation)
ath-miR164a_1ss21AT	RrubChr8G00200260.1	RrubChr8G00200260	protein CUP-SHAPED COTYLEDON 2 [Sesamum indicum]	GO:0003677(DNA binding);GO:0003700(DNA binding transcription factor activity);GO:0005515(protein binding);GO:0005634(nucleus);GO:0006351(transcription, DNA-templated);GO:0006355(regulation of transcription, DNA-templated);GO:0007275(multicellular organism development);GO:0010072(primary shoot apical meristem specification);GO:0010223(secondary shoot formation);GO:0048366(leaf development);GO:0090…	ko03013(RNA transport);ko03015(mRNA surveillance pathway);ko03018(RNA degradation)
ath-miR164a_1ss21AT	RrubChr8G00204040.1	RrubChr8G00204040	hypothetical protein CDL12_00749 [Handroanthus impetiginosus]	GO:0003677(DNA binding);GO:0003700(DNA binding transcription factor activity);GO:0005634(nucleus);GO:0006351(transcription, DNA-templated);GO:0006355(regulation of transcription, DNA-templated);GO:0007275(multicellular organism development);GO:0009734(auxin-activated signaling pathway);GO:0010072(primary shoot apical meristem specification);GO:0048527(lateral root development)	NA
ath-miR164a_1ss21AT	RrubChr9G00215720.1	RrubChr9G00215720	protein NRT1/ PTR FAMILY 8.1-like [Sesamum indicum]	GO:0005215(transporter activity);GO:0005886(plasma membrane);GO:0006807(nitrogen compound metabolic process);GO:0006857(oligopeptide transport);GO:0009506(plasmodesma);GO:0015031(protein transport);GO:0016020(membrane);GO:0016021(integral component of membrane);GO:0022857(transmembrane transporter activity);GO:0042937(tripeptide transmembrane transporter activity);GO:0042938(dipeptide transport);…	NA
ath-miR164a_1ss21AT	RrubChr9G00220590.1	RrubChr9G00220590	hydroxyphenylpyruvate reductase [Perilla frutescens]	GO:0047995(hydroxyphenylpyruvate reductase activity);GO:0055114(oxidation-reduction process)	ko00630(Glyoxylate and dicarboxylate metabolism);ko00260(Glycine, serine and threonine metabolism)
ath-miR164a_1ss21AT	RrubChr11G00270010.1	RrubChr11G00270010	protein transport protein Sec24-like At3g07100 [Sesamum indicum]	GO:0000139(Golgi membrane);GO:0005215(transporter activity);GO:0005515(protein binding);GO:0005737(cytoplasm);GO:0005789(endoplasmic reticulum membrane);GO:0005829(cytosol);GO:0006810(transport);GO:0006886(intracellular protein transport);GO:0006888(ER to Golgi vesicle-mediated transport);GO:0007029(endoplasmic reticulum organization);GO:0007030(Golgi organization);GO:0008270(zinc ion binding);GO…	ko04141(Protein processing in endoplasmic reticulum)
ath-miR164b-3p_1ss10AC	RrubChr11G00269470.1	RrubChr11G00269470	protein KINESIN LIGHT CHAIN-RELATED 1 [Sesamum indicum]	GO:0008150(biological_process);GO:0009507(chloroplast)	NA
ath-miR164b-3p_1ss10AC	RrubChr2G00031650.1	RrubChr2G00031650	hypothetical protein CDL12_27430 [Handroanthus impetiginosus]	GO:0005634(nucleus);GO:0009793(embryo development ending in seed dormancy);GO:0016787(hydrolase activity)	NA
ath-miR164b-3p_1ss10AC	RrubChr5G00114490.1	RrubChr5G00114490	probable serine/threonine-protein kinase PBL11 [Sesamum indicum]	GO:0004675(transmembrane receptor protein serine/threonine kinase activity);GO:0005515(protein binding);GO:0005524(ATP binding);GO:0005634(nucleus);GO:0005730(nucleolus);GO:0005737(cytoplasm);GO:0005886(plasma membrane);GO:0007166(cell surface receptor signaling pathway);GO:0009507(chloroplast);GO:0009620(response to fungus);GO:0016301(kinase activity);GO:0045087(innate immune response);GO:004677…	NA
ath-miR164b-3p_1ss10AC	RrubChr7G00187860.1	RrubChr7G00187860	U-box domain-containing protein 40-like [Sesamum indicum]	GO:0005634(nucleus);GO:0005737(cytoplasm)	NA
ath-miR164b-3p_1ss10AC	RrubChr11G00268310.1	RrubChr11G00268310	(+)-epi-alpha-bisabolol synthase-like [Sesamum indicum]	GO:0010334(sesquiterpene synthase activity);GO:0045339(farnesyl diphosphate catabolic process);GO:1901943((+)-epi-alpha-bisabolol biosynthetic process)	ko00902(Monoterpenoid biosynthesis)
ath-miR164b-3p_2ss9CT10AG	RrubChr12G00286710.1	RrubChr12G00286710	eukaryotic translation initiation factor 4B3-like [Sesamum indicum]	GO:0042803(protein homodimerization activity)	NA
ath-miR164b-3p_2ss9CT10AG	RrubChr6G00155910.1	RrubChr6G00155910	uncharacterized protein LOC105160162 isoform X1 [Sesamum indicum]	GO:0005622(intracellular);GO:0006623(protein targeting to vacuole);GO:0019898(extrinsic component of membrane);GO:0045053(protein retention in Golgi apparatus)	NA
ath-miR164b-3p_2ss9CT10AG	RrubChr7G00187860.1	RrubChr7G00187860	U-box domain-containing protein 40-like [Sesamum indicum]	GO:0005634(nucleus);GO:0005737(cytoplasm)	NA
ath-miR164b-3p_2ss9CT10AG	RrubChr9G00216030.1	RrubChr9G00216030	copper transporter 1-like [Manihot esculenta]	GO:0005375(copper ion transmembrane transporter activity);GO:0005773(vacuole);GO:0006825(copper ion transport);GO:0016021(integral component of membrane);GO:0035434(copper ion transmembrane transport)	NA
ath-miR164b-3p_2ss9CT10AG	RrubChr7G00165920.1	RrubChr7G00165920	acyl-coenzyme A thioesterase 13 [Sesamum indicum]	GO:0005777(peroxisome);GO:0008150(biological_process);GO:0016788(hydrolase activity, acting on ester bonds);GO:0047617(acyl-CoA hydrolase activity)	NA
ath-miR164b-3p_2ss9CT10AG	RrubChr9G00218710.1	RrubChr9G00218710	F-box protein At2g27310-like [Sesamum indicum]	GO:0003674(molecular_function);GO:0008150(biological_process)	NA
ath-miR164c-5p_1ss21GA	RrubChr11G00260240.1	RrubChr11G00260240	hypothetical protein CDL12_21652 [Handroanthus impetiginosus]	GO:0003674(molecular_function);GO:0005783(endoplasmic reticulum);GO:0008150(biological_process);GO:0009507(chloroplast)	NA
ath-miR164c-5p_1ss21GA	RrubChr11G00278270.1	RrubChr11G00278270	NAC domain-containing protein 79 [Sesamum indicum]	GO:0003677(DNA binding);GO:0003700(DNA binding transcription factor activity);GO:0005634(nucleus);GO:0006351(transcription, DNA-templated);GO:0006355(regulation of transcription, DNA-templated);GO:0007275(multicellular organism development)	ko03013(RNA transport);ko03015(mRNA surveillance pathway);ko03018(RNA degradation)
ath-miR164c-5p_1ss21GA	RrubChr2G00041650.1	RrubChr2G00041650	NAC domain-containing protein 100-like [Coffea arabica]	GO:0003677(DNA binding);GO:0003700(DNA binding transcription factor activity);GO:0005634(nucleus);GO:0006351(transcription, DNA-templated);GO:0006355(regulation of transcription, DNA-templated);GO:0007275(multicellular organism development)	ko03013(RNA transport);ko03015(mRNA surveillance pathway);ko03018(RNA degradation)
ath-miR164c-5p_1ss21GA	RrubChr3G00072870.1	RrubChr3G00072870	NAC domain-containing protein 79 [Sesamum indicum]	GO:0003677(DNA binding);GO:0003700(DNA binding transcription factor activity);GO:0005634(nucleus);GO:0006351(transcription, DNA-templated);GO:0006355(regulation of transcription, DNA-templated);GO:0007275(multicellular organism development)	ko03013(RNA transport);ko03015(mRNA surveillance pathway);ko03018(RNA degradation)
ath-miR164c-5p_1ss21GA	RrubChr4G00103810.1	RrubChr4G00103810	putative late blight resistance protein homolog R1B-14 [Sesamum indicum]	GO:0005524(ATP binding);GO:0006952(defense response);GO:0009506(plasmodesma);GO:0043531(ADP binding)	ko04626(Plant-pathogen interaction)
ath-miR164c-5p_1ss21GA	RrubChr8G00200260.1	RrubChr8G00200260	protein CUP-SHAPED COTYLEDON 2 [Sesamum indicum]	GO:0003677(DNA binding);GO:0003700(DNA binding transcription factor activity);GO:0005515(protein binding);GO:0005634(nucleus);GO:0006351(transcription, DNA-templated);GO:0006355(regulation of transcription, DNA-templated);GO:0007275(multicellular organism development);GO:0010072(primary shoot apical meristem specification);GO:0010223(secondary shoot formation);GO:0048366(leaf development);GO:0090…	ko03013(RNA transport);ko03015(mRNA surveillance pathway);ko03018(RNA degradation)
ath-miR164c-5p_1ss21GA	RrubChr8G00204040.1	RrubChr8G00204040	hypothetical protein CDL12_00749 [Handroanthus impetiginosus]	GO:0003677(DNA binding);GO:0003700(DNA binding transcription factor activity);GO:0005634(nucleus);GO:0006351(transcription, DNA-templated);GO:0006355(regulation of transcription, DNA-templated);GO:0007275(multicellular organism development);GO:0009734(auxin-activated signaling pathway);GO:0010072(primary shoot apical meristem specification);GO:0048527(lateral root development)	NA
ath-miR164c-5p_1ss21GA	RrubChr11G00270010.1	RrubChr11G00270010	protein transport protein Sec24-like At3g07100 [Sesamum indicum]	GO:0000139(Golgi membrane);GO:0005215(transporter activity);GO:0005515(protein binding);GO:0005737(cytoplasm);GO:0005789(endoplasmic reticulum membrane);GO:0005829(cytosol);GO:0006810(transport);GO:0006886(intracellular protein transport);GO:0006888(ER to Golgi vesicle-mediated transport);GO:0007029(endoplasmic reticulum organization);GO:0007030(Golgi organization);GO:0008270(zinc ion binding);GO…	ko04141(Protein processing in endoplasmic reticulum)
ath-miR164c-5p_1ss21GA	RrubChr7G00173390.1	RrubChr7G00173390	Proline synthetase co-transcribed protein [Handroanthus impetiginosus]	GO:0005622(intracellular);GO:0030170(pyridoxal phosphate binding)	NA
ath-miR164c-5p_R-1	RrubChr10G00236890.1	RrubChr10G00236890	uncharacterized protein LOC105173120 [Sesamum indicum]	GO:0003674(molecular_function);GO:0005886(plasma membrane);GO:0008150(biological_process);GO:0016021(integral component of membrane)	NA
ath-miR164c-5p_R-1	RrubChr11G00260240.1	RrubChr11G00260240	hypothetical protein CDL12_21652 [Handroanthus impetiginosus]	GO:0003674(molecular_function);GO:0005783(endoplasmic reticulum);GO:0008150(biological_process);GO:0009507(chloroplast)	NA
ath-miR164c-5p_R-1	RrubChr11G00268260.1	RrubChr11G00268260	hypothetical protein CDL12_23676 [Handroanthus impetiginosus]	GO:0003674(molecular_function);GO:0008150(biological_process);GO:0009507(chloroplast);GO:0016021(integral component of membrane)	NA
ath-miR164c-5p_R-1	RrubChr11G00278270.1	RrubChr11G00278270	NAC domain-containing protein 79 [Sesamum indicum]	GO:0003677(DNA binding);GO:0003700(DNA binding transcription factor activity);GO:0005634(nucleus);GO:0006351(transcription, DNA-templated);GO:0006355(regulation of transcription, DNA-templated);GO:0007275(multicellular organism development)	ko03013(RNA transport);ko03015(mRNA surveillance pathway);ko03018(RNA degradation)
ath-miR164c-5p_R-1	RrubChr2G00029710.1	RrubChr2G00029710	Serine/threonine protein kinase [Handroanthus impetiginosus]	GO:0004674(protein serine/threonine kinase activity);GO:0005524(ATP binding);GO:0005622(intracellular);GO:0005886(plasma membrane);GO:0016301(kinase activity);GO:0018105(peptidyl-serine phosphorylation);GO:0018107(peptidyl-threonine phosphorylation);GO:0035556(intracellular signal transduction)	NA
ath-miR164c-5p_R-1	RrubChr2G00041650.1	RrubChr2G00041650	NAC domain-containing protein 100-like [Coffea arabica]	GO:0003677(DNA binding);GO:0003700(DNA binding transcription factor activity);GO:0005634(nucleus);GO:0006351(transcription, DNA-templated);GO:0006355(regulation of transcription, DNA-templated);GO:0007275(multicellular organism development)	ko03013(RNA transport);ko03015(mRNA surveillance pathway);ko03018(RNA degradation)
ath-miR164c-5p_R-1	RrubChr3G00072870.1	RrubChr3G00072870	NAC domain-containing protein 79 [Sesamum indicum]	GO:0003677(DNA binding);GO:0003700(DNA binding transcription factor activity);GO:0005634(nucleus);GO:0006351(transcription, DNA-templated);GO:0006355(regulation of transcription, DNA-templated);GO:0007275(multicellular organism development)	ko03013(RNA transport);ko03015(mRNA surveillance pathway);ko03018(RNA degradation)
ath-miR164c-5p_R-1	RrubChr4G00103810.1	RrubChr4G00103810	putative late blight resistance protein homolog R1B-14 [Sesamum indicum]	GO:0005524(ATP binding);GO:0006952(defense response);GO:0009506(plasmodesma);GO:0043531(ADP binding)	ko04626(Plant-pathogen interaction)
ath-miR164c-5p_R-1	RrubChr8G00200260.1	RrubChr8G00200260	protein CUP-SHAPED COTYLEDON 2 [Sesamum indicum]	GO:0003677(DNA binding);GO:0003700(DNA binding transcription factor activity);GO:0005515(protein binding);GO:0005634(nucleus);GO:0006351(transcription, DNA-templated);GO:0006355(regulation of transcription, DNA-templated);GO:0007275(multicellular organism development);GO:0010072(primary shoot apical meristem specification);GO:0010223(secondary shoot formation);GO:0048366(leaf development);GO:0090…	ko03013(RNA transport);ko03015(mRNA surveillance pathway);ko03018(RNA degradation)
ath-miR164c-5p_R-1	RrubChr8G00204040.1	RrubChr8G00204040	hypothetical protein CDL12_00749 [Handroanthus impetiginosus]	GO:0003677(DNA binding);GO:0003700(DNA binding transcription factor activity);GO:0005634(nucleus);GO:0006351(transcription, DNA-templated);GO:0006355(regulation of transcription, DNA-templated);GO:0007275(multicellular organism development);GO:0009734(auxin-activated signaling pathway);GO:0010072(primary shoot apical meristem specification);GO:0048527(lateral root development)	NA
ath-miR164c-5p_R-1	RrubChr8G00205620.1	RrubChr8G00205620	inositol transporter 4 [Sesamum indicum]	GO:0005351(carbohydrate:proton symporter activity);GO:0005355(glucose transmembrane transporter activity);GO:0005887(integral component of plasma membrane);GO:0046323(glucose import)	NA
ath-miR164c-5p_R-1	RrubChr9G00220590.1	RrubChr9G00220590	hydroxyphenylpyruvate reductase [Perilla frutescens]	GO:0047995(hydroxyphenylpyruvate reductase activity);GO:0055114(oxidation-reduction process)	ko00630(Glyoxylate and dicarboxylate metabolism);ko00260(Glycine, serine and threonine metabolism)
ath-miR164c-5p_R-1	RrubChr11G00270010.1	RrubChr11G00270010	protein transport protein Sec24-like At3g07100 [Sesamum indicum]	GO:0000139(Golgi membrane);GO:0005215(transporter activity);GO:0005515(protein binding);GO:0005737(cytoplasm);GO:0005789(endoplasmic reticulum membrane);GO:0005829(cytosol);GO:0006810(transport);GO:0006886(intracellular protein transport);GO:0006888(ER to Golgi vesicle-mediated transport);GO:0007029(endoplasmic reticulum organization);GO:0007030(Golgi organization);GO:0008270(zinc ion binding);GO…	ko04141(Protein processing in endoplasmic reticulum)
ath-miR166a-3p	RrubChr11G00262530.1	RrubChr11G00262530	homeobox-leucine zipper protein REVOLUTA [Sesamum indicum]	GO:0003677(DNA binding);GO:0003700(DNA binding transcription factor activity);GO:0005634(nucleus);GO:0006351(transcription, DNA-templated);GO:0006355(regulation of transcription, DNA-templated);GO:0008289(lipid binding);GO:0009855(determination of bilateral symmetry);GO:0009944(polarity specification of adaxial/abaxial axis);GO:0009956(radial pattern formation);GO:0010014(meristem initiation);GO:…	NA
ath-miR166a-3p	RrubChr1G00002120.1	RrubChr1G00002120	homeobox-leucine zipper protein ATHB-14 isoform X2 [Sesamum indicum]	GO:0003677(DNA binding);GO:0003700(DNA binding transcription factor activity);GO:0005634(nucleus);GO:0006351(transcription, DNA-templated);GO:0006355(regulation of transcription, DNA-templated);GO:0008289(lipid binding);GO:0009855(determination of bilateral symmetry);GO:0009944(polarity specification of adaxial/abaxial axis);GO:0009955(adaxial/abaxial pattern specification);GO:0010014(meristem in…	NA
ath-miR166a-3p	RrubChr2G00035100.1	RrubChr2G00035100	homeobox-leucine zipper protein ATHB-15 [Sesamum indicum]	GO:0003677(DNA binding);GO:0003700(DNA binding transcription factor activity);GO:0005634(nucleus);GO:0006351(transcription, DNA-templated);GO:0006355(regulation of transcription, DNA-templated);GO:0008289(lipid binding);GO:0009855(determination of bilateral symmetry);GO:0009965(leaf morphogenesis);GO:0010014(meristem initiation);GO:0010073(meristem maintenance);GO:0010075(regulation of meristem g…	NA
ath-miR166a-3p	RrubChr7G00171140.1	RrubChr7G00171140	cysteine synthase isoform X1 [Sesamum indicum]	GO:0004124(cysteine synthase activity);GO:0005737(cytoplasm);GO:0006535(cysteine biosynthetic process from serine);GO:0030170(pyridoxal phosphate binding)	ko00920(Sulfur metabolism);ko00270(Cysteine and methionine metabolism)
ath-miR166a-3p	RrubChr8G00210540.1	RrubChr8G00210540	hypothetical protein Ahy_A07g037125 [Arachis hypogaea]	GO:0003677(DNA binding);GO:0003700(DNA binding transcription factor activity);GO:0005634(nucleus);GO:0006351(transcription, DNA-templated);GO:0006355(regulation of transcription, DNA-templated);GO:0008289(lipid binding);GO:0009855(determination of bilateral symmetry);GO:0009944(polarity specification of adaxial/abaxial axis);GO:0009956(radial pattern formation);GO:0010014(meristem initiation);GO:…	NA
ath-miR166a-3p	RrubChr9G00217230.1	RrubChr9G00217230	homeobox-leucine zipper protein REVOLUTA [Sesamum indicum]	GO:0003677(DNA binding);GO:0003700(DNA binding transcription factor activity);GO:0005634(nucleus);GO:0006351(transcription, DNA-templated);GO:0006355(regulation of transcription, DNA-templated);GO:0008289(lipid binding);GO:0009855(determination of bilateral symmetry);GO:0009944(polarity specification of adaxial/abaxial axis);GO:0009956(radial pattern formation);GO:0010014(meristem initiation);GO:…	NA
ath-miR166a-3p	RrubChr9G00220230.1	RrubChr9G00220230	homeobox-leucine zipper protein ATHB-15 [Sesamum indicum]	GO:0003677(DNA binding);GO:0003700(DNA binding transcription factor activity);GO:0005634(nucleus);GO:0006351(transcription, DNA-templated);GO:0006355(regulation of transcription, DNA-templated);GO:0008289(lipid binding);GO:0009855(determination of bilateral symmetry);GO:0009965(leaf morphogenesis);GO:0010014(meristem initiation);GO:0010073(meristem maintenance);GO:0010075(regulation of meristem g…	NA
ath-miR166a-3p	RrubChr9G00232860.1	RrubChr9G00232860	homeobox-leucine zipper protein ATHB-15 [Sesamum indicum]	GO:0003677(DNA binding);GO:0003700(DNA binding transcription factor activity);GO:0005634(nucleus);GO:0006351(transcription, DNA-templated);GO:0006355(regulation of transcription, DNA-templated);GO:0008284(positive regulation of cell proliferation);GO:0008289(lipid binding);GO:0009733(response to auxin);GO:0010014(meristem initiation);GO:0010067(procambium histogenesis);GO:0010072(primary shoot ap…	NA
ath-miR166a-3p	RrubChr11G00264640.1	RrubChr11G00264640	PREDICTED: mitochondrial import receptor subunit TOM40-1-like [Erythranthe guttata]	GO:0005742(mitochondrial outer membrane translocase complex);GO:0030150(protein import into mitochondrial matrix)	NA
ath-miR166a-3p_1ss15AC	RrubChr11G00262530.1	RrubChr11G00262530	homeobox-leucine zipper protein REVOLUTA [Sesamum indicum]	GO:0003677(DNA binding);GO:0003700(DNA binding transcription factor activity);GO:0005634(nucleus);GO:0006351(transcription, DNA-templated);GO:0006355(regulation of transcription, DNA-templated);GO:0008289(lipid binding);GO:0009855(determination of bilateral symmetry);GO:0009944(polarity specification of adaxial/abaxial axis);GO:0009956(radial pattern formation);GO:0010014(meristem initiation);GO:…	NA
ath-miR166a-3p_1ss15AC	RrubChr2G00035100.1	RrubChr2G00035100	homeobox-leucine zipper protein ATHB-15 [Sesamum indicum]	GO:0003677(DNA binding);GO:0003700(DNA binding transcription factor activity);GO:0005634(nucleus);GO:0006351(transcription, DNA-templated);GO:0006355(regulation of transcription, DNA-templated);GO:0008289(lipid binding);GO:0009855(determination of bilateral symmetry);GO:0009965(leaf morphogenesis);GO:0010014(meristem initiation);GO:0010073(meristem maintenance);GO:0010075(regulation of meristem g…	NA
ath-miR166a-3p_1ss15AC	RrubChr7G00171140.1	RrubChr7G00171140	cysteine synthase isoform X1 [Sesamum indicum]	GO:0004124(cysteine synthase activity);GO:0005737(cytoplasm);GO:0006535(cysteine biosynthetic process from serine);GO:0030170(pyridoxal phosphate binding)	ko00920(Sulfur metabolism);ko00270(Cysteine and methionine metabolism)
ath-miR166a-3p_1ss15AC	RrubChr7G00186530.1	RrubChr7G00186530	uncharacterized protein At5g39570 [Sesamum indicum]	GO:0003674(molecular_function);GO:0005886(plasma membrane);GO:0008150(biological_process)	NA
ath-miR166a-3p_1ss15AC	RrubChr8G00210540.1	RrubChr8G00210540	hypothetical protein Ahy_A07g037125 [Arachis hypogaea]	GO:0003677(DNA binding);GO:0003700(DNA binding transcription factor activity);GO:0005634(nucleus);GO:0006351(transcription, DNA-templated);GO:0006355(regulation of transcription, DNA-templated);GO:0008289(lipid binding);GO:0009855(determination of bilateral symmetry);GO:0009944(polarity specification of adaxial/abaxial axis);GO:0009956(radial pattern formation);GO:0010014(meristem initiation);GO:…	NA
ath-miR166a-3p_1ss15AC	RrubChr9G00217230.1	RrubChr9G00217230	homeobox-leucine zipper protein REVOLUTA [Sesamum indicum]	GO:0003677(DNA binding);GO:0003700(DNA binding transcription factor activity);GO:0005634(nucleus);GO:0006351(transcription, DNA-templated);GO:0006355(regulation of transcription, DNA-templated);GO:0008289(lipid binding);GO:0009855(determination of bilateral symmetry);GO:0009944(polarity specification of adaxial/abaxial axis);GO:0009956(radial pattern formation);GO:0010014(meristem initiation);GO:…	NA
ath-miR166a-3p_1ss15AC	RrubChr9G00220230.1	RrubChr9G00220230	homeobox-leucine zipper protein ATHB-15 [Sesamum indicum]	GO:0003677(DNA binding);GO:0003700(DNA binding transcription factor activity);GO:0005634(nucleus);GO:0006351(transcription, DNA-templated);GO:0006355(regulation of transcription, DNA-templated);GO:0008289(lipid binding);GO:0009855(determination of bilateral symmetry);GO:0009965(leaf morphogenesis);GO:0010014(meristem initiation);GO:0010073(meristem maintenance);GO:0010075(regulation of meristem g…	NA
ath-miR166a-3p_1ss15AC	RrubChr9G00232860.1	RrubChr9G00232860	homeobox-leucine zipper protein ATHB-15 [Sesamum indicum]	GO:0003677(DNA binding);GO:0003700(DNA binding transcription factor activity);GO:0005634(nucleus);GO:0006351(transcription, DNA-templated);GO:0006355(regulation of transcription, DNA-templated);GO:0008284(positive regulation of cell proliferation);GO:0008289(lipid binding);GO:0009733(response to auxin);GO:0010014(meristem initiation);GO:0010067(procambium histogenesis);GO:0010072(primary shoot ap…	NA
ath-miR166a-3p_1ss20CT	RrubChr11G00262530.1	RrubChr11G00262530	homeobox-leucine zipper protein REVOLUTA [Sesamum indicum]	GO:0003677(DNA binding);GO:0003700(DNA binding transcription factor activity);GO:0005634(nucleus);GO:0006351(transcription, DNA-templated);GO:0006355(regulation of transcription, DNA-templated);GO:0008289(lipid binding);GO:0009855(determination of bilateral symmetry);GO:0009944(polarity specification of adaxial/abaxial axis);GO:0009956(radial pattern formation);GO:0010014(meristem initiation);GO:…	NA
ath-miR166a-3p_1ss20CT	RrubChr11G00265300.1	RrubChr11G00265300	Exocyst component protein [Handroanthus impetiginosus]	GO:0000145(exocyst);GO:0005515(protein binding);GO:0005737(cytoplasm);GO:0005829(cytosol);GO:0005886(plasma membrane);GO:0006887(exocytosis);GO:0006904(vesicle docking involved in exocytosis);GO:0009414(response to water deprivation);GO:0009789(positive regulation of abscisic acid-activated signaling pathway);GO:0012505(endomembrane system);GO:0042742(defense response to bacterium);GO:0045335(pha…	NA
ath-miR166a-3p_1ss20CT	RrubChr11G00268810.1	RrubChr11G00268810	PREDICTED: ubiquitin carboxyl-terminal hydrolase 6 [Erythranthe guttata]	GO:0004843(thiol-dependent ubiquitin-specific protease activity);GO:0005516(calmodulin binding);GO:0005634(nucleus);GO:0006511(ubiquitin-dependent protein catabolic process);GO:0009506(plasmodesma);GO:0016579(protein deubiquitination);GO:0036459(thiol-dependent ubiquitinyl hydrolase activity)	NA
ath-miR166a-3p_1ss20CT	RrubChr1G00002120.1	RrubChr1G00002120	homeobox-leucine zipper protein ATHB-14 isoform X2 [Sesamum indicum]	GO:0003677(DNA binding);GO:0003700(DNA binding transcription factor activity);GO:0005634(nucleus);GO:0006351(transcription, DNA-templated);GO:0006355(regulation of transcription, DNA-templated);GO:0008289(lipid binding);GO:0009855(determination of bilateral symmetry);GO:0009944(polarity specification of adaxial/abaxial axis);GO:0009955(adaxial/abaxial pattern specification);GO:0010014(meristem in…	NA
ath-miR166a-3p_1ss20CT	RrubChr2G00035100.1	RrubChr2G00035100	homeobox-leucine zipper protein ATHB-15 [Sesamum indicum]	GO:0003677(DNA binding);GO:0003700(DNA binding transcription factor activity);GO:0005634(nucleus);GO:0006351(transcription, DNA-templated);GO:0006355(regulation of transcription, DNA-templated);GO:0008289(lipid binding);GO:0009855(determination of bilateral symmetry);GO:0009965(leaf morphogenesis);GO:0010014(meristem initiation);GO:0010073(meristem maintenance);GO:0010075(regulation of meristem g…	NA
ath-miR166a-3p_1ss20CT	RrubChr6G00148200.1	RrubChr6G00148200	glucan endo-1,3-beta-glucosidase 14-like [Sesamum indicum]	GO:0004553(hydrolase activity, hydrolyzing O-glycosyl compounds);GO:0030247(polysaccharide binding);GO:0046658(anchored component of plasma membrane)	ko00500(Starch and sucrose metabolism)
ath-miR166a-3p_1ss20CT	RrubChr7G00171140.1	RrubChr7G00171140	cysteine synthase isoform X1 [Sesamum indicum]	GO:0004124(cysteine synthase activity);GO:0005737(cytoplasm);GO:0006535(cysteine biosynthetic process from serine);GO:0030170(pyridoxal phosphate binding)	ko00920(Sulfur metabolism);ko00270(Cysteine and methionine metabolism)
ath-miR166a-3p_1ss20CT	RrubChr8G00190640.1	RrubChr8G00190640	Ferredoxin [Handroanthus impetiginosus]	GO:0005739(mitochondrion);GO:0009055(electron transfer activity);GO:0009507(chloroplast);GO:0009735(response to cytokinin);GO:0051536(iron-sulfur cluster binding)	NA
ath-miR166a-3p_1ss20CT	RrubChr8G00210540.1	RrubChr8G00210540	hypothetical protein Ahy_A07g037125 [Arachis hypogaea]	GO:0003677(DNA binding);GO:0003700(DNA binding transcription factor activity);GO:0005634(nucleus);GO:0006351(transcription, DNA-templated);GO:0006355(regulation of transcription, DNA-templated);GO:0008289(lipid binding);GO:0009855(determination of bilateral symmetry);GO:0009944(polarity specification of adaxial/abaxial axis);GO:0009956(radial pattern formation);GO:0010014(meristem initiation);GO:…	NA
ath-miR166a-3p_1ss20CT	RrubChr9G00217230.1	RrubChr9G00217230	homeobox-leucine zipper protein REVOLUTA [Sesamum indicum]	GO:0003677(DNA binding);GO:0003700(DNA binding transcription factor activity);GO:0005634(nucleus);GO:0006351(transcription, DNA-templated);GO:0006355(regulation of transcription, DNA-templated);GO:0008289(lipid binding);GO:0009855(determination of bilateral symmetry);GO:0009944(polarity specification of adaxial/abaxial axis);GO:0009956(radial pattern formation);GO:0010014(meristem initiation);GO:…	NA
ath-miR166a-3p_1ss20CT	RrubChr9G00218500.1	RrubChr9G00218500	glucan endo-1,3-beta-glucosidase 14 [Sesamum indicum]	GO:0004553(hydrolase activity, hydrolyzing O-glycosyl compounds);GO:0030247(polysaccharide binding);GO:0046658(anchored component of plasma membrane)	ko00500(Starch and sucrose metabolism)
ath-miR166a-3p_1ss20CT	RrubChr9G00220230.1	RrubChr9G00220230	homeobox-leucine zipper protein ATHB-15 [Sesamum indicum]	GO:0003677(DNA binding);GO:0003700(DNA binding transcription factor activity);GO:0005634(nucleus);GO:0006351(transcription, DNA-templated);GO:0006355(regulation of transcription, DNA-templated);GO:0008289(lipid binding);GO:0009855(determination of bilateral symmetry);GO:0009965(leaf morphogenesis);GO:0010014(meristem initiation);GO:0010073(meristem maintenance);GO:0010075(regulation of meristem g…	NA
ath-miR166a-3p_1ss20CT	RrubChr9G00232860.1	RrubChr9G00232860	homeobox-leucine zipper protein ATHB-15 [Sesamum indicum]	GO:0003677(DNA binding);GO:0003700(DNA binding transcription factor activity);GO:0005634(nucleus);GO:0006351(transcription, DNA-templated);GO:0006355(regulation of transcription, DNA-templated);GO:0008284(positive regulation of cell proliferation);GO:0008289(lipid binding);GO:0009733(response to auxin);GO:0010014(meristem initiation);GO:0010067(procambium histogenesis);GO:0010072(primary shoot ap…	NA
ath-miR166a-3p_1ss20CT	RrubChr11G00264640.1	RrubChr11G00264640	PREDICTED: mitochondrial import receptor subunit TOM40-1-like [Erythranthe guttata]	GO:0005742(mitochondrial outer membrane translocase complex);GO:0030150(protein import into mitochondrial matrix)	NA
ath-miR166a-3p_1ss20CT	RrubChr2G00051650.1	RrubChr2G00051650	enolase [Sesamum indicum]	GO:0000015(phosphopyruvate hydratase complex);GO:0000287(magnesium ion binding);GO:0003677(DNA binding);GO:0004634(phosphopyruvate hydratase activity);GO:0005507(copper ion binding);GO:0005634(nucleus);GO:0005737(cytoplasm);GO:0005739(mitochondrion);GO:0005740(mitochondrial envelope);GO:0005741(mitochondrial outer membrane);GO:0005829(cytosol);GO:0005886(plasma membrane);GO:0006096(glycolytic pro…	ko00010(Glycolysis / Gluconeogenesis);ko03018(RNA degradation)
ath-miR166a-3p_1ss20CT	RrubChr8G00202430.1	RrubChr8G00202430	transcription initiation factor TFIID subunit 6 [Sesamum indicum]	GO:0001102(RNA polymerase II activating transcription factor binding);GO:0005634(nucleus);GO:0006352(DNA-templated transcription, initiation);GO:0009860(pollen tube growth);GO:0046982(protein heterodimerization activity);GO:0051090(regulation of DNA binding transcription factor activity);GO:0051123(RNA polymerase II transcriptional preinitiation complex assembly)	ko03022(Basal transcription factors)
ath-miR166a-3p_1ss21CA	RrubChr11G00262530.1	RrubChr11G00262530	homeobox-leucine zipper protein REVOLUTA [Sesamum indicum]	GO:0003677(DNA binding);GO:0003700(DNA binding transcription factor activity);GO:0005634(nucleus);GO:0006351(transcription, DNA-templated);GO:0006355(regulation of transcription, DNA-templated);GO:0008289(lipid binding);GO:0009855(determination of bilateral symmetry);GO:0009944(polarity specification of adaxial/abaxial axis);GO:0009956(radial pattern formation);GO:0010014(meristem initiation);GO:…	NA
ath-miR166a-3p_1ss21CA	RrubChr11G00265300.1	RrubChr11G00265300	Exocyst component protein [Handroanthus impetiginosus]	GO:0000145(exocyst);GO:0005515(protein binding);GO:0005737(cytoplasm);GO:0005829(cytosol);GO:0005886(plasma membrane);GO:0006887(exocytosis);GO:0006904(vesicle docking involved in exocytosis);GO:0009414(response to water deprivation);GO:0009789(positive regulation of abscisic acid-activated signaling pathway);GO:0012505(endomembrane system);GO:0042742(defense response to bacterium);GO:0045335(pha…	NA
ath-miR166a-3p_1ss21CA	RrubChr11G00268810.1	RrubChr11G00268810	PREDICTED: ubiquitin carboxyl-terminal hydrolase 6 [Erythranthe guttata]	GO:0004843(thiol-dependent ubiquitin-specific protease activity);GO:0005516(calmodulin binding);GO:0005634(nucleus);GO:0006511(ubiquitin-dependent protein catabolic process);GO:0009506(plasmodesma);GO:0016579(protein deubiquitination);GO:0036459(thiol-dependent ubiquitinyl hydrolase activity)	NA
ath-miR166a-3p_1ss21CA	RrubChr1G00002120.1	RrubChr1G00002120	homeobox-leucine zipper protein ATHB-14 isoform X2 [Sesamum indicum]	GO:0003677(DNA binding);GO:0003700(DNA binding transcription factor activity);GO:0005634(nucleus);GO:0006351(transcription, DNA-templated);GO:0006355(regulation of transcription, DNA-templated);GO:0008289(lipid binding);GO:0009855(determination of bilateral symmetry);GO:0009944(polarity specification of adaxial/abaxial axis);GO:0009955(adaxial/abaxial pattern specification);GO:0010014(meristem in…	NA
ath-miR166a-3p_1ss21CA	RrubChr1G00007680.1	RrubChr1G00007680	PREDICTED: 7-dehydrocholesterol reductase [Erythranthe guttata]	GO:0009918(sterol delta7 reductase activity);GO:0016126(sterol biosynthetic process);GO:0016132(brassinosteroid biosynthetic process);GO:0030176(integral component of endoplasmic reticulum membrane)	ko00100(Steroid biosynthesis)
ath-miR166a-3p_1ss21CA	RrubChr2G00035100.1	RrubChr2G00035100	homeobox-leucine zipper protein ATHB-15 [Sesamum indicum]	GO:0003677(DNA binding);GO:0003700(DNA binding transcription factor activity);GO:0005634(nucleus);GO:0006351(transcription, DNA-templated);GO:0006355(regulation of transcription, DNA-templated);GO:0008289(lipid binding);GO:0009855(determination of bilateral symmetry);GO:0009965(leaf morphogenesis);GO:0010014(meristem initiation);GO:0010073(meristem maintenance);GO:0010075(regulation of meristem g…	NA
ath-miR166a-3p_1ss21CA	RrubChr4G00090520.1	RrubChr4G00090520	pathogen-related protein-like [Sesamum indicum]	GO:0003674(molecular_function);GO:0005737(cytoplasm);GO:0008150(biological_process)	NA
ath-miR166a-3p_1ss21CA	RrubChr6G00148200.1	RrubChr6G00148200	glucan endo-1,3-beta-glucosidase 14-like [Sesamum indicum]	GO:0004553(hydrolase activity, hydrolyzing O-glycosyl compounds);GO:0030247(polysaccharide binding);GO:0046658(anchored component of plasma membrane)	ko00500(Starch and sucrose metabolism)
ath-miR166a-3p_1ss21CA	RrubChr7G00171140.1	RrubChr7G00171140	cysteine synthase isoform X1 [Sesamum indicum]	GO:0004124(cysteine synthase activity);GO:0005737(cytoplasm);GO:0006535(cysteine biosynthetic process from serine);GO:0030170(pyridoxal phosphate binding)	ko00920(Sulfur metabolism);ko00270(Cysteine and methionine metabolism)
ath-miR166a-3p_1ss21CA	RrubChr8G00210540.1	RrubChr8G00210540	hypothetical protein Ahy_A07g037125 [Arachis hypogaea]	GO:0003677(DNA binding);GO:0003700(DNA binding transcription factor activity);GO:0005634(nucleus);GO:0006351(transcription, DNA-templated);GO:0006355(regulation of transcription, DNA-templated);GO:0008289(lipid binding);GO:0009855(determination of bilateral symmetry);GO:0009944(polarity specification of adaxial/abaxial axis);GO:0009956(radial pattern formation);GO:0010014(meristem initiation);GO:…	NA
ath-miR166a-3p_1ss21CA	RrubChr9G00217230.1	RrubChr9G00217230	homeobox-leucine zipper protein REVOLUTA [Sesamum indicum]	GO:0003677(DNA binding);GO:0003700(DNA binding transcription factor activity);GO:0005634(nucleus);GO:0006351(transcription, DNA-templated);GO:0006355(regulation of transcription, DNA-templated);GO:0008289(lipid binding);GO:0009855(determination of bilateral symmetry);GO:0009944(polarity specification of adaxial/abaxial axis);GO:0009956(radial pattern formation);GO:0010014(meristem initiation);GO:…	NA
ath-miR166a-3p_1ss21CA	RrubChr9G00220230.1	RrubChr9G00220230	homeobox-leucine zipper protein ATHB-15 [Sesamum indicum]	GO:0003677(DNA binding);GO:0003700(DNA binding transcription factor activity);GO:0005634(nucleus);GO:0006351(transcription, DNA-templated);GO:0006355(regulation of transcription, DNA-templated);GO:0008289(lipid binding);GO:0009855(determination of bilateral symmetry);GO:0009965(leaf morphogenesis);GO:0010014(meristem initiation);GO:0010073(meristem maintenance);GO:0010075(regulation of meristem g…	NA
ath-miR166a-3p_1ss21CA	RrubChr9G00232860.1	RrubChr9G00232860	homeobox-leucine zipper protein ATHB-15 [Sesamum indicum]	GO:0003677(DNA binding);GO:0003700(DNA binding transcription factor activity);GO:0005634(nucleus);GO:0006351(transcription, DNA-templated);GO:0006355(regulation of transcription, DNA-templated);GO:0008284(positive regulation of cell proliferation);GO:0008289(lipid binding);GO:0009733(response to auxin);GO:0010014(meristem initiation);GO:0010067(procambium histogenesis);GO:0010072(primary shoot ap…	NA
ath-miR166a-3p_1ss21CA	RrubChr11G00264640.1	RrubChr11G00264640	PREDICTED: mitochondrial import receptor subunit TOM40-1-like [Erythranthe guttata]	GO:0005742(mitochondrial outer membrane translocase complex);GO:0030150(protein import into mitochondrial matrix)	NA
ath-miR166a-3p_L+2R-2	RrubChr11G00261730.1	RrubChr11G00261730	Tub family protein [Handroanthus impetiginosus]	GO:0005929(cilium);GO:0035091(phosphatidylinositol binding);GO:0061512(protein localization to cilium)	NA
ath-miR166a-3p_L+2R-2	RrubChr11G00262530.1	RrubChr11G00262530	homeobox-leucine zipper protein REVOLUTA [Sesamum indicum]	GO:0003677(DNA binding);GO:0003700(DNA binding transcription factor activity);GO:0005634(nucleus);GO:0006351(transcription, DNA-templated);GO:0006355(regulation of transcription, DNA-templated);GO:0008289(lipid binding);GO:0009855(determination of bilateral symmetry);GO:0009944(polarity specification of adaxial/abaxial axis);GO:0009956(radial pattern formation);GO:0010014(meristem initiation);GO:…	NA
ath-miR166a-3p_L+2R-2	RrubChr1G00002120.1	RrubChr1G00002120	homeobox-leucine zipper protein ATHB-14 isoform X2 [Sesamum indicum]	GO:0003677(DNA binding);GO:0003700(DNA binding transcription factor activity);GO:0005634(nucleus);GO:0006351(transcription, DNA-templated);GO:0006355(regulation of transcription, DNA-templated);GO:0008289(lipid binding);GO:0009855(determination of bilateral symmetry);GO:0009944(polarity specification of adaxial/abaxial axis);GO:0009955(adaxial/abaxial pattern specification);GO:0010014(meristem in…	NA
ath-miR166a-3p_L+2R-2	RrubChr2G00035100.1	RrubChr2G00035100	homeobox-leucine zipper protein ATHB-15 [Sesamum indicum]	GO:0003677(DNA binding);GO:0003700(DNA binding transcription factor activity);GO:0005634(nucleus);GO:0006351(transcription, DNA-templated);GO:0006355(regulation of transcription, DNA-templated);GO:0008289(lipid binding);GO:0009855(determination of bilateral symmetry);GO:0009965(leaf morphogenesis);GO:0010014(meristem initiation);GO:0010073(meristem maintenance);GO:0010075(regulation of meristem g…	NA
ath-miR166a-3p_L+2R-2	RrubChr6G00146560.1	RrubChr6G00146560	hypothetical protein F511_00457 [Dorcoceras hygrometricum]	GO:0000790(nuclear chromatin);GO:0003677(DNA binding);GO:0006342(chromatin silencing)	NA
ath-miR166a-3p_L+2R-2	RrubChr8G00210540.1	RrubChr8G00210540	hypothetical protein Ahy_A07g037125 [Arachis hypogaea]	GO:0003677(DNA binding);GO:0003700(DNA binding transcription factor activity);GO:0005634(nucleus);GO:0006351(transcription, DNA-templated);GO:0006355(regulation of transcription, DNA-templated);GO:0008289(lipid binding);GO:0009855(determination of bilateral symmetry);GO:0009944(polarity specification of adaxial/abaxial axis);GO:0009956(radial pattern formation);GO:0010014(meristem initiation);GO:…	NA
ath-miR166a-3p_L+2R-2	RrubChr9G00217230.1	RrubChr9G00217230	homeobox-leucine zipper protein REVOLUTA [Sesamum indicum]	GO:0003677(DNA binding);GO:0003700(DNA binding transcription factor activity);GO:0005634(nucleus);GO:0006351(transcription, DNA-templated);GO:0006355(regulation of transcription, DNA-templated);GO:0008289(lipid binding);GO:0009855(determination of bilateral symmetry);GO:0009944(polarity specification of adaxial/abaxial axis);GO:0009956(radial pattern formation);GO:0010014(meristem initiation);GO:…	NA
ath-miR166a-3p_L+2R-2	RrubChr9G00220230.1	RrubChr9G00220230	homeobox-leucine zipper protein ATHB-15 [Sesamum indicum]	GO:0003677(DNA binding);GO:0003700(DNA binding transcription factor activity);GO:0005634(nucleus);GO:0006351(transcription, DNA-templated);GO:0006355(regulation of transcription, DNA-templated);GO:0008289(lipid binding);GO:0009855(determination of bilateral symmetry);GO:0009965(leaf morphogenesis);GO:0010014(meristem initiation);GO:0010073(meristem maintenance);GO:0010075(regulation of meristem g…	NA
ath-miR166a-3p_L+2R-2	RrubChr9G00232860.1	RrubChr9G00232860	homeobox-leucine zipper protein ATHB-15 [Sesamum indicum]	GO:0003677(DNA binding);GO:0003700(DNA binding transcription factor activity);GO:0005634(nucleus);GO:0006351(transcription, DNA-templated);GO:0006355(regulation of transcription, DNA-templated);GO:0008284(positive regulation of cell proliferation);GO:0008289(lipid binding);GO:0009733(response to auxin);GO:0010014(meristem initiation);GO:0010067(procambium histogenesis);GO:0010072(primary shoot ap…	NA
ath-miR166a-3p_L+2R-2	RrubChr2G00037490.1	RrubChr2G00037490	heat shock 70 kDa protein 14 [Sesamum indicum]	GO:0005515(protein binding);GO:0005524(ATP binding);GO:0005634(nucleus);GO:0005737(cytoplasm);GO:0005829(cytosol);GO:0005886(plasma membrane);GO:0006457(protein folding);GO:0009408(response to heat);GO:0046686(response to cadmium ion)	NA
ath-miR166a-3p_R-3_1ss18CT	RrubChr10G00249780.1	RrubChr10G00249780	glyceraldehyde-3-phosphate dehydrogenase B, chloroplastic [Rosa chinensis]	GO:0004365(glyceraldehyde-3-phosphate dehydrogenase (NAD+) (phosphorylating) activity);GO:0005829(cytosol);GO:0006006(glucose metabolic process);GO:0006096(glycolytic process);GO:0009409(response to cold);GO:0009416(response to light stimulus);GO:0009507(chloroplast);GO:0009535(chloroplast thylakoid membrane);GO:0009570(chloroplast stroma);GO:0009744(response to sucrose);GO:0009941(chloroplast en…	ko00710(Carbon fixation in photosynthetic organisms)
ath-miR166a-3p_R-3_1ss18CT	RrubChr11G00262530.1	RrubChr11G00262530	homeobox-leucine zipper protein REVOLUTA [Sesamum indicum]	GO:0003677(DNA binding);GO:0003700(DNA binding transcription factor activity);GO:0005634(nucleus);GO:0006351(transcription, DNA-templated);GO:0006355(regulation of transcription, DNA-templated);GO:0008289(lipid binding);GO:0009855(determination of bilateral symmetry);GO:0009944(polarity specification of adaxial/abaxial axis);GO:0009956(radial pattern formation);GO:0010014(meristem initiation);GO:…	NA
ath-miR166a-3p_R-3_1ss18CT	RrubChr11G00265300.1	RrubChr11G00265300	Exocyst component protein [Handroanthus impetiginosus]	GO:0000145(exocyst);GO:0005515(protein binding);GO:0005737(cytoplasm);GO:0005829(cytosol);GO:0005886(plasma membrane);GO:0006887(exocytosis);GO:0006904(vesicle docking involved in exocytosis);GO:0009414(response to water deprivation);GO:0009789(positive regulation of abscisic acid-activated signaling pathway);GO:0012505(endomembrane system);GO:0042742(defense response to bacterium);GO:0045335(pha…	NA
ath-miR166a-3p_R-3_1ss18CT	RrubChr11G00267570.1	RrubChr11G00267570	PREDICTED: riboflavin synthase [Erythranthe guttata]	GO:0004746(riboflavin synthase activity);GO:0009231(riboflavin biosynthetic process);GO:0009507(chloroplast)	ko00740(Riboflavin metabolism)
ath-miR166a-3p_R-3_1ss18CT	RrubChr11G00268810.1	RrubChr11G00268810	PREDICTED: ubiquitin carboxyl-terminal hydrolase 6 [Erythranthe guttata]	GO:0004843(thiol-dependent ubiquitin-specific protease activity);GO:0005516(calmodulin binding);GO:0005634(nucleus);GO:0006511(ubiquitin-dependent protein catabolic process);GO:0009506(plasmodesma);GO:0016579(protein deubiquitination);GO:0036459(thiol-dependent ubiquitinyl hydrolase activity)	NA
ath-miR166a-3p_R-3_1ss18CT	RrubChr11G00269060.1	RrubChr11G00269060	protein FAR1-RELATED SEQUENCE 4 [Sesamum indicum]	GO:0003700(DNA binding transcription factor activity);GO:0005634(nucleus);GO:0006355(regulation of transcription, DNA-templated);GO:0008270(zinc ion binding);GO:0009585(red, far-red light phototransduction);GO:0009639(response to red or far red light);GO:0010018(far-red light signaling pathway);GO:0042753(positive regulation of circadian rhythm);GO:0045893(positive regulation of transcription, DN…	NA
ath-miR166a-3p_R-3_1ss18CT	RrubChr11G00271500.1	RrubChr11G00271500	PREDICTED: anamorsin homolog [Erythranthe guttata]	GO:0005737(cytoplasm);GO:0016226(iron-sulfur cluster assembly)	NA
ath-miR166a-3p_R-3_1ss18CT	RrubChr12G00285580.1	RrubChr12G00285580	PREDICTED: probable alanine--tRNA ligase, chloroplastic [Erythranthe guttata]	GO:0000049(tRNA binding);GO:0004813(alanine-tRNA ligase activity);GO:0005739(mitochondrion);GO:0005829(cytosol);GO:0006400(tRNA modification);GO:0006419(alanyl-tRNA aminoacylation);GO:0009507(chloroplast);GO:0016597(amino acid binding)	ko00970(Aminoacyl-tRNA biosynthesis)
ath-miR166a-3p_R-3_1ss18CT	RrubChr12G00297340.1	RrubChr12G00297340	heat shock cognate protein 80 [Sesamum indicum]	GO:0005515(protein binding);GO:0005524(ATP binding);GO:0005730(nucleolus);GO:0005737(cytoplasm);GO:0005794(Golgi apparatus);GO:0005829(cytosol);GO:0005886(plasma membrane);GO:0006457(protein folding);GO:0009408(response to heat);GO:0016020(membrane);GO:0045087(innate immune response);GO:0051082(unfolded protein binding);GO:0051131(chaperone-mediated protein complex assembly);GO:0071277(cellular r…	ko04141(Protein processing in endoplasmic reticulum);ko04626(Plant-pathogen interaction)
ath-miR166a-3p_R-3_1ss18CT	RrubChr1G00002120.1	RrubChr1G00002120	homeobox-leucine zipper protein ATHB-14 isoform X2 [Sesamum indicum]	GO:0003677(DNA binding);GO:0003700(DNA binding transcription factor activity);GO:0005634(nucleus);GO:0006351(transcription, DNA-templated);GO:0006355(regulation of transcription, DNA-templated);GO:0008289(lipid binding);GO:0009855(determination of bilateral symmetry);GO:0009944(polarity specification of adaxial/abaxial axis);GO:0009955(adaxial/abaxial pattern specification);GO:0010014(meristem in…	NA
ath-miR166a-3p_R-3_1ss18CT	RrubChr2G00035100.1	RrubChr2G00035100	homeobox-leucine zipper protein ATHB-15 [Sesamum indicum]	GO:0003677(DNA binding);GO:0003700(DNA binding transcription factor activity);GO:0005634(nucleus);GO:0006351(transcription, DNA-templated);GO:0006355(regulation of transcription, DNA-templated);GO:0008289(lipid binding);GO:0009855(determination of bilateral symmetry);GO:0009965(leaf morphogenesis);GO:0010014(meristem initiation);GO:0010073(meristem maintenance);GO:0010075(regulation of meristem g…	NA
ath-miR166a-3p_R-3_1ss18CT	RrubChr2G00037480.1	RrubChr2G00037480	heat shock 70 kDa protein 14 [Sesamum indicum]	GO:0005515(protein binding);GO:0005524(ATP binding);GO:0005634(nucleus);GO:0005737(cytoplasm);GO:0005829(cytosol);GO:0005886(plasma membrane);GO:0006457(protein folding);GO:0009408(response to heat);GO:0046686(response to cadmium ion)	NA
ath-miR166a-3p_R-3_1ss18CT	RrubChr2G00037490.1	RrubChr2G00037490	heat shock 70 kDa protein 14 [Sesamum indicum]	GO:0005515(protein binding);GO:0005524(ATP binding);GO:0005634(nucleus);GO:0005737(cytoplasm);GO:0005829(cytosol);GO:0005886(plasma membrane);GO:0006457(protein folding);GO:0009408(response to heat);GO:0046686(response to cadmium ion)	NA
ath-miR166a-3p_R-3_1ss18CT	RrubChr2G00042570.1	RrubChr2G00042570	Phosphoprotein phosphatase [Handroanthus impetiginosus]	GO:0004721(phosphoprotein phosphatase activity)	NA
ath-miR166a-3p_R-3_1ss18CT	RrubChr2G00046950.1	RrubChr2G00046950	Calcium/calmodulin-dependent protein kinase [Handroanthus impetiginosus]	GO:0003674(molecular_function);GO:0005575(cellular_component);GO:0009061(anaerobic respiration)	NA
ath-miR166a-3p_R-3_1ss18CT	RrubChr2G00047790.1	RrubChr2G00047790	S-adenosylmethionine synthase [Actinidia chinensis var. chinensis]	GO:0004478(methionine adenosyltransferase activity);GO:0005829(cytosol)	ko00270(Cysteine and methionine metabolism)
ath-miR166a-3p_R-3_1ss18CT	RrubChr3G00060940.1	RrubChr3G00060940	PREDICTED: probable plastid-lipid-associated protein 14, chloroplastic isoform X1 [Erythranthe guttata]	GO:0004672(protein kinase activity);GO:0004693(cyclin-dependent protein serine/threonine kinase activity);GO:0005524(ATP binding);GO:0005634(nucleus);GO:0006468(protein phosphorylation);GO:0007346(regulation of mitotic cell cycle);GO:0009507(chloroplast);GO:0010468(regulation of gene expression);GO:0016301(kinase activity)	NA
ath-miR166a-3p_R-3_1ss18CT	RrubChr3G00071710.1	RrubChr3G00071710	glutamate--tRNA ligase, cytoplasmic [Sesamum indicum]	GO:0003723(RNA binding);GO:0004818(glutamate-tRNA ligase activity);GO:0004819(glutamine-tRNA ligase activity);GO:0005739(mitochondrion);GO:0005829(cytosol);GO:0006424(glutamyl-tRNA aminoacylation);GO:0006425(glutaminyl-tRNA aminoacylation)	ko00860(Porphyrin and chlorophyll metabolism);ko00970(Aminoacyl-tRNA biosynthesis)
ath-miR166a-3p_R-3_1ss18CT	RrubChr3G00072740.1	RrubChr3G00072740	ribulose-phosphate 3-epimerase, chloroplastic [Sesamum indicum]	GO:0004750(ribulose-phosphate 3-epimerase activity);GO:0005829(cytosol);GO:0009052(pentose-phosphate shunt, non-oxidative branch);GO:0019323(pentose catabolic process);GO:0044262(cellular carbohydrate metabolic process);GO:0046872(metal ion binding)	ko00030(Pentose phosphate pathway);ko00040(Pentose and glucuronate interconversions);ko00710(Carbon fixation in photosynthetic organisms)
ath-miR166a-3p_R-3_1ss18CT	RrubChr3G00075650.1	RrubChr3G00075650	protein TIFY 10B-like [Sesamum indicum]	GO:0003714(transcription corepressor activity);GO:0005634(nucleus);GO:0009611(response to wounding);GO:0031347(regulation of defense response);GO:1903507(negative regulation of nucleic acid-templated transcription);GO:2000022(regulation of jasmonic acid mediated signaling pathway)	ko04075(Plant hormone signal transduction)
ath-miR166a-3p_R-3_1ss18CT	RrubChr4G00090520.1	RrubChr4G00090520	pathogen-related protein-like [Sesamum indicum]	GO:0003674(molecular_function);GO:0005737(cytoplasm);GO:0008150(biological_process)	NA
ath-miR166a-3p_R-3_1ss18CT	RrubChr6G00142910.1	RrubChr6G00142910	ATP-dependent helicase BRM isoform X1 [Sesamum indicum]	GO:0003677(DNA binding);GO:0003682(chromatin binding);GO:0004386(helicase activity);GO:0005515(protein binding);GO:0005524(ATP binding);GO:0005634(nucleus);GO:0005829(cytosol);GO:0006351(transcription, DNA-templated);GO:0006355(regulation of transcription, DNA-templated);GO:0007275(multicellular organism development);GO:0008094(DNA-dependent ATPase activity);GO:0010050(vegetative phase change);GO…	NA
ath-miR166a-3p_R-3_1ss18CT	RrubChr6G00148200.1	RrubChr6G00148200	glucan endo-1,3-beta-glucosidase 14-like [Sesamum indicum]	GO:0004553(hydrolase activity, hydrolyzing O-glycosyl compounds);GO:0030247(polysaccharide binding);GO:0046658(anchored component of plasma membrane)	ko00500(Starch and sucrose metabolism)
ath-miR166a-3p_R-3_1ss18CT	RrubChr6G00155240.1	RrubChr6G00155240	PREDICTED: 60S ribosomal protein L9-like [Erythranthe guttata]	GO:0002181(cytoplasmic translation);GO:0003723(RNA binding);GO:0003735(structural constituent of ribosome);GO:0022625(cytosolic large ribosomal subunit)	ko03010(Ribosome)
ath-miR166a-3p_R-3_1ss18CT	RrubChr7G00171140.1	RrubChr7G00171140	cysteine synthase isoform X1 [Sesamum indicum]	GO:0004124(cysteine synthase activity);GO:0005737(cytoplasm);GO:0006535(cysteine biosynthetic process from serine);GO:0030170(pyridoxal phosphate binding)	ko00920(Sulfur metabolism);ko00270(Cysteine and methionine metabolism)
ath-miR166a-3p_R-3_1ss18CT	RrubChr8G00190640.1	RrubChr8G00190640	Ferredoxin [Handroanthus impetiginosus]	GO:0005739(mitochondrion);GO:0009055(electron transfer activity);GO:0009507(chloroplast);GO:0009735(response to cytokinin);GO:0051536(iron-sulfur cluster binding)	NA
ath-miR166a-3p_R-3_1ss18CT	RrubChr8G00210540.1	RrubChr8G00210540	hypothetical protein Ahy_A07g037125 [Arachis hypogaea]	GO:0003677(DNA binding);GO:0003700(DNA binding transcription factor activity);GO:0005634(nucleus);GO:0006351(transcription, DNA-templated);GO:0006355(regulation of transcription, DNA-templated);GO:0008289(lipid binding);GO:0009855(determination of bilateral symmetry);GO:0009944(polarity specification of adaxial/abaxial axis);GO:0009956(radial pattern formation);GO:0010014(meristem initiation);GO:…	NA
ath-miR166a-3p_R-3_1ss18CT	RrubChr9G00217230.1	RrubChr9G00217230	homeobox-leucine zipper protein REVOLUTA [Sesamum indicum]	GO:0003677(DNA binding);GO:0003700(DNA binding transcription factor activity);GO:0005634(nucleus);GO:0006351(transcription, DNA-templated);GO:0006355(regulation of transcription, DNA-templated);GO:0008289(lipid binding);GO:0009855(determination of bilateral symmetry);GO:0009944(polarity specification of adaxial/abaxial axis);GO:0009956(radial pattern formation);GO:0010014(meristem initiation);GO:…	NA
ath-miR166a-3p_R-3_1ss18CT	RrubChr9G00218500.1	RrubChr9G00218500	glucan endo-1,3-beta-glucosidase 14 [Sesamum indicum]	GO:0004553(hydrolase activity, hydrolyzing O-glycosyl compounds);GO:0030247(polysaccharide binding);GO:0046658(anchored component of plasma membrane)	ko00500(Starch and sucrose metabolism)
ath-miR166a-3p_R-3_1ss18CT	RrubChr9G00220230.1	RrubChr9G00220230	homeobox-leucine zipper protein ATHB-15 [Sesamum indicum]	GO:0003677(DNA binding);GO:0003700(DNA binding transcription factor activity);GO:0005634(nucleus);GO:0006351(transcription, DNA-templated);GO:0006355(regulation of transcription, DNA-templated);GO:0008289(lipid binding);GO:0009855(determination of bilateral symmetry);GO:0009965(leaf morphogenesis);GO:0010014(meristem initiation);GO:0010073(meristem maintenance);GO:0010075(regulation of meristem g…	NA
ath-miR166a-3p_R-3_1ss18CT	RrubChr9G00232860.1	RrubChr9G00232860	homeobox-leucine zipper protein ATHB-15 [Sesamum indicum]	GO:0003677(DNA binding);GO:0003700(DNA binding transcription factor activity);GO:0005634(nucleus);GO:0006351(transcription, DNA-templated);GO:0006355(regulation of transcription, DNA-templated);GO:0008284(positive regulation of cell proliferation);GO:0008289(lipid binding);GO:0009733(response to auxin);GO:0010014(meristem initiation);GO:0010067(procambium histogenesis);GO:0010072(primary shoot ap…	NA
ath-miR166a-3p_R-3_1ss18CT	RrubChr10G00245960.1	RrubChr10G00245960	pleiotropic drug resistance protein 2 [Sesamum indicum]	GO:0005886(plasma membrane);GO:0016021(integral component of membrane);GO:0042626(ATPase activity, coupled to transmembrane movement of substances)	ko02010(ABC transporters)
ath-miR166a-3p_R-3_1ss18CT	RrubChr11G00264640.1	RrubChr11G00264640	PREDICTED: mitochondrial import receptor subunit TOM40-1-like [Erythranthe guttata]	GO:0005742(mitochondrial outer membrane translocase complex);GO:0030150(protein import into mitochondrial matrix)	NA
ath-miR166a-3p_R-3_1ss18CT	RrubChr2G00051650.1	RrubChr2G00051650	enolase [Sesamum indicum]	GO:0000015(phosphopyruvate hydratase complex);GO:0000287(magnesium ion binding);GO:0003677(DNA binding);GO:0004634(phosphopyruvate hydratase activity);GO:0005507(copper ion binding);GO:0005634(nucleus);GO:0005737(cytoplasm);GO:0005739(mitochondrion);GO:0005740(mitochondrial envelope);GO:0005741(mitochondrial outer membrane);GO:0005829(cytosol);GO:0005886(plasma membrane);GO:0006096(glycolytic pro…	ko00010(Glycolysis / Gluconeogenesis);ko03018(RNA degradation)
ath-miR166a-3p_R-3_1ss18CT	RrubChr3G00072050.1	RrubChr3G00072050	ABC transporter B family member 25 [Sesamum indicum]	GO:0016021(integral component of membrane);GO:0042626(ATPase activity, coupled to transmembrane movement of substances);GO:0055085(transmembrane transport)	ko02010(ABC transporters)
ath-miR166a-3p_R-3_1ss18CT	RrubChr4G00095080.1	RrubChr4G00095080	cytochrome P450 81E8-like isoform X2 [Sesamum indicum]	GO:0016020(membrane);GO:0016709(oxidoreductase activity, acting on paired donors, with incorporation or reduction of molecular oxygen, NAD(P)H as one donor, and incorporation of one atom of oxygen);GO:0042343(indole glucosinolate metabolic process);GO:0044550(secondary metabolite biosynthetic process);GO:0098542(defense response to other organism)	NA
ath-miR166a-3p_R-3_1ss18CT	RrubChr5G00123670.1	RrubChr5G00123670	Myotrophin [Handroanthus impetiginosus]	GO:0005515(protein binding);GO:0005634(nucleus);GO:0005737(cytoplasm);GO:0005886(plasma membrane);GO:0006355(regulation of transcription, DNA-templated);GO:0008289(lipid binding);GO:0030941(chloroplast targeting sequence binding);GO:0031359(integral component of chloroplast outer membrane);GO:0045036(protein targeting to chloroplast)	NA
ath-miR166a-3p_R-3_1ss18CT	RrubChr7G00178230.1	RrubChr7G00178230	Armadillo repeat protein [Handroanthus impetiginosus]	GO:0005634(nucleus);GO:0005737(cytoplasm)	NA
ath-miR166a-3p_R-3_1ss18CT	RrubChr7G00184090.1	RrubChr7G00184090	protein LOW PSII ACCUMULATION 3, chloroplastic [Sesamum indicum]	GO:0009507(chloroplast);GO:0010207(photosystem II assembly)	NA
ath-miR166a-3p_R-3_1ss18CT	RrubChr9G00224650.1	RrubChr9G00224650	pentatricopeptide repeat-containing protein At1g10910, chloroplastic isoform X3 [Sesamum indicum]	GO:0003723(RNA binding);GO:0004519(endonuclease activity);GO:0005739(mitochondrion);GO:0009451(RNA modification);GO:0009507(chloroplast);GO:0043231(intracellular membrane-bounded organelle)	NA
ath-miR166a-5p_1ss4CA	RrubChr10G00242630.1	RrubChr10G00242630	alpha-1,4 glucan phosphorylase L-2 isozyme, chloroplastic/amyloplastic [Sesamum indicum]	GO:0005737(cytoplasm);GO:0005980(glycogen catabolic process);GO:0008184(glycogen phosphorylase activity);GO:0030170(pyridoxal phosphate binding)	ko00500(Starch and sucrose metabolism)
ath-miR166a-5p_1ss4CA	RrubChr6G00148560.1	RrubChr6G00148560	mRNA deadenylase subunit [Handroanthus impetiginosus]	GO:0000175(3'-5'-exoribonuclease activity);GO:0000288(nuclear-transcribed mRNA catabolic process, deadenylation-dependent decay);GO:0030014(CCR4-NOT complex)	ko03018(RNA degradation)
ath-miR166a-5p_1ss4CA	RrubChr7G00188210.1	RrubChr7G00188210	hypothetical protein CDL12_18346 [Handroanthus impetiginosus]	GO:0003674(molecular_function);GO:0005634(nucleus);GO:0008150(biological_process)	NA
ath-miR166a-5p_1ss4CA	RrubChr9G00218820.1	RrubChr9G00218820	probable CCR4-associated factor 1 homolog 11 [Sesamum indicum]	GO:0000175(3'-5'-exoribonuclease activity);GO:0000288(nuclear-transcribed mRNA catabolic process, deadenylation-dependent decay);GO:0030014(CCR4-NOT complex)	ko03018(RNA degradation)
ath-miR166a-5p_1ss4CA	RrubChr11G00265830.1	RrubChr11G00265830	PREDICTED: monocopper oxidase-like protein SKU5 [Erythranthe guttata]	GO:0005507(copper ion binding);GO:0009505(plant-type cell wall);GO:0009506(plasmodesma);GO:0016722(oxidoreductase activity, oxidizing metal ions);GO:0046658(anchored component of plasma membrane)	NA
ath-miR166a-5p_L-1R+2_1ss4CA	RrubChr5G00119870.1	RrubChr5G00119870	PREDICTED: uncharacterized protein LOC105961925 [Erythranthe guttata]	GO:0005576(extracellular region);GO:0006869(lipid transport);GO:0008289(lipid binding)	NA
ath-miR166a-5p_L-1R+2_1ss4CA	RrubChr4G00096530.1	RrubChr4G00096530	Xyloglucan:xyloglucosyl transferase [Handroanthus impetiginosus]	GO:0004553(hydrolase activity, hydrolyzing O-glycosyl compounds);GO:0005576(extracellular region);GO:0005618(cell wall);GO:0005794(Golgi apparatus);GO:0010411(xyloglucan metabolic process);GO:0016762(xyloglucan:xyloglucosyl transferase activity);GO:0016798(hydrolase activity, acting on glycosyl bonds);GO:0042546(cell wall biogenesis);GO:0048046(apoplast);GO:0071555(cell wall organization)	NA
ath-miR166a-5p_R+2_1ss4CA	RrubChr7G00188210.1	RrubChr7G00188210	hypothetical protein CDL12_18346 [Handroanthus impetiginosus]	GO:0003674(molecular_function);GO:0005634(nucleus);GO:0008150(biological_process)	NA
ath-miR166e-5p_1ss16AT	RrubChr10G00242630.1	RrubChr10G00242630	alpha-1,4 glucan phosphorylase L-2 isozyme, chloroplastic/amyloplastic [Sesamum indicum]	GO:0005737(cytoplasm);GO:0005980(glycogen catabolic process);GO:0008184(glycogen phosphorylase activity);GO:0030170(pyridoxal phosphate binding)	ko00500(Starch and sucrose metabolism)
ath-miR166e-5p_1ss16AT	RrubChr6G00148560.1	RrubChr6G00148560	mRNA deadenylase subunit [Handroanthus impetiginosus]	GO:0000175(3'-5'-exoribonuclease activity);GO:0000288(nuclear-transcribed mRNA catabolic process, deadenylation-dependent decay);GO:0030014(CCR4-NOT complex)	ko03018(RNA degradation)
ath-miR166e-5p_1ss16AT	RrubChr7G00188210.1	RrubChr7G00188210	hypothetical protein CDL12_18346 [Handroanthus impetiginosus]	GO:0003674(molecular_function);GO:0005634(nucleus);GO:0008150(biological_process)	NA
ath-miR166e-5p_1ss16AT	RrubChr9G00218820.1	RrubChr9G00218820	probable CCR4-associated factor 1 homolog 11 [Sesamum indicum]	GO:0000175(3'-5'-exoribonuclease activity);GO:0000288(nuclear-transcribed mRNA catabolic process, deadenylation-dependent decay);GO:0030014(CCR4-NOT complex)	ko03018(RNA degradation)
ath-miR166e-5p_1ss16AT	RrubChr11G00265830.1	RrubChr11G00265830	PREDICTED: monocopper oxidase-like protein SKU5 [Erythranthe guttata]	GO:0005507(copper ion binding);GO:0009505(plant-type cell wall);GO:0009506(plasmodesma);GO:0016722(oxidoreductase activity, oxidizing metal ions);GO:0046658(anchored component of plasma membrane)	NA
ath-miR167a-3p_2ss9TG10C-	RrubChr10G00238760.1	RrubChr10G00238760	hypothetical protein CDL12_00708 [Handroanthus impetiginosus]	GO:0009416(response to light stimulus);GO:0009733(response to auxin)	ko04075(Plant hormone signal transduction)
ath-miR167a-3p_2ss9TG10C-	RrubChr10G00245390.1	RrubChr10G00245390	phospholipase A1-Igamma3, chloroplastic [Sesamum indicum]	GO:0004620(phospholipase activity);GO:0004806(triglyceride lipase activity);GO:0006629(lipid metabolic process);GO:0008970(phosphatidylcholine 1-acylhydrolase activity);GO:0009507(chloroplast);GO:0016042(lipid catabolic process);GO:0047714(galactolipase activity)	ko00220(Arginine biosynthesis)
ath-miR167a-3p_2ss9TG10C-	RrubChr11G00270470.1	RrubChr11G00270470	cytochrome P450 CYP76AH30 [Isodon rubescens]	GO:0016020(membrane);GO:0016709(oxidoreductase activity, acting on paired donors, with incorporation or reduction of molecular oxygen, NAD(P)H as one donor, and incorporation of one atom of oxygen);GO:0044550(secondary metabolite biosynthetic process)	NA
ath-miR167a-3p_2ss9TG10C-	RrubChr1G00011830.1	RrubChr1G00011830	hypothetical protein MIMGU_mgv1a007044mg [Erythranthe guttata]	GO:0004416(hydroxyacylglutathione hydrolase activity);GO:0005737(cytoplasm);GO:0005739(mitochondrion);GO:0008270(zinc ion binding);GO:0008800(beta-lactamase activity);GO:0009507(chloroplast);GO:0009651(response to salt stress);GO:0017001(antibiotic catabolic process);GO:0019243(methylglyoxal catabolic process to D-lactate via S-lactoyl-glutathione);GO:0034059(response to anoxia);GO:0043200(respon…	ko00620(Pyruvate metabolism)
ath-miR167a-3p_2ss9TG10C-	RrubChr1G00012310.1	RrubChr1G00012310	PREDICTED: LON peptidase N-terminal domain and RING finger protein 1-like [Erythranthe guttata]	GO:0004176(ATP-dependent peptidase activity);GO:0006508(proteolysis);GO:0008233(peptidase activity);GO:0009507(chloroplast)	NA
ath-miR167a-3p_2ss9TG10C-	RrubChr4G00099140.1	RrubChr4G00099140	ethylene-responsive transcription factor ERF118-like [Sesamum indicum]	GO:0003677(DNA binding);GO:0003700(DNA binding transcription factor activity);GO:0005634(nucleus);GO:0006351(transcription, DNA-templated);GO:0006355(regulation of transcription, DNA-templated);GO:0009873(ethylene-activated signaling pathway)	ko04626(Plant-pathogen interaction)
ath-miR167a-3p_2ss9TG10C-	RrubChr5G00113120.1	RrubChr5G00113120	hypothetical protein CDL12_00923 [Handroanthus impetiginosus]	GO:0004864(protein phosphatase inhibitor activity);GO:0005634(nucleus);GO:0005737(cytoplasm);GO:0009738(abscisic acid-activated signaling pathway);GO:0010427(abscisic acid binding);GO:0080163(regulation of protein serine/threonine phosphatase activity)	ko04016(MAPK signaling pathway - plant);ko04075(Plant hormone signal transduction)
ath-miR167a-3p_2ss9TG10C-	RrubChr6G00152430.1	RrubChr6G00152430	UDP-glycosyltransferase 74B1 [Sesamum indicum]	GO:0009813(flavonoid biosynthetic process);GO:0043231(intracellular membrane-bounded organelle);GO:0052696(flavonoid glucuronidation);GO:0080043(quercetin 3-O-glucosyltransferase activity);GO:0080044(quercetin 7-O-glucosyltransferase activity)	ko00380(Tryptophan metabolism);ko00966(Glucosinolate biosynthesis)
ath-miR167a-3p_2ss9TG10C-	RrubChr7G00168910.1	RrubChr7G00168910	xyloglucan 6-xylosyltransferase 2 [Sesamum indicum]	GO:0000139(Golgi membrane);GO:0000271(polysaccharide biosynthetic process);GO:0005515(protein binding);GO:0005768(endosome);GO:0005794(Golgi apparatus);GO:0005802(trans-Golgi network);GO:0006486(protein glycosylation);GO:0009969(xyloglucan biosynthetic process);GO:0010411(xyloglucan metabolic process);GO:0016021(integral component of membrane);GO:0016740(transferase activity);GO:0016757(transfera…	NA
ath-miR167a-3p_2ss9TG10C-	RrubChr10G00251470.1	RrubChr10G00251470	PREDICTED: zinc finger CCCH domain-containing protein 15-like [Erythranthe guttata]	GO:0003676(nucleic acid binding);GO:0003700(DNA binding transcription factor activity);GO:0003730(mRNA 3'-UTR binding);GO:0005634(nucleus);GO:0005829(cytosol);GO:0006355(regulation of transcription, DNA-templated);GO:0044212(transcription regulatory region DNA binding);GO:0046872(metal ion binding);GO:0061158(3'-UTR-mediated mRNA destabilization)	NA
ath-miR167a-3p_2ss9TG10C-	RrubChr12G00285160.1	RrubChr12G00285160	HMG CoA reductase, partial [Pogostemon cablin]	GO:0004420(hydroxymethylglutaryl-CoA reductase (NADPH) activity);GO:0005778(peroxisomal membrane);GO:0005789(endoplasmic reticulum membrane);GO:0008299(isoprenoid biosynthetic process);GO:0016126(sterol biosynthetic process)	ko00900(Terpenoid backbone biosynthesis)
ath-miR167a-3p_2ss9TG10C-	RrubChr7G00177460.1	RrubChr7G00177460	terpene synthase 5 [Prunella vulgaris]	GO:0010334(sesquiterpene synthase activity);GO:0045338(farnesyl diphosphate metabolic process);GO:0051762(sesquiterpene biosynthetic process)	ko00909(Sesquiterpenoid and triterpenoid biosynthesis)
ath-miR167a-5p	RrubChr11G00272410.1	RrubChr11G00272410	probable leucine-rich repeat receptor-like protein kinase At5g49770 isoform X1 [Sesamum indicum]	GO:0004674(protein serine/threonine kinase activity);GO:0005524(ATP binding);GO:0005576(extracellular region);GO:0005773(vacuole);GO:0005886(plasma membrane);GO:0006468(protein phosphorylation);GO:0016021(integral component of membrane);GO:0016301(kinase activity)	NA
ath-miR167a-5p	RrubChr11G00274770.1	RrubChr11G00274770	hypothetical protein CDL12_14827 [Handroanthus impetiginosus]	GO:0003700(DNA binding transcription factor activity);GO:0005515(protein binding);GO:0005634(nucleus);GO:0006351(transcription, DNA-templated);GO:0006355(regulation of transcription, DNA-templated);GO:0009733(response to auxin);GO:0009734(auxin-activated signaling pathway);GO:0009908(flower development);GO:0043565(sequence-specific DNA binding)	ko04075(Plant hormone signal transduction)
ath-miR167a-5p	RrubChr12G00283260.1	RrubChr12G00283260	hypothetical protein CDL12_21678 [Handroanthus impetiginosus]	GO:0003677(DNA binding);GO:0005634(nucleus);GO:0006351(transcription, DNA-templated);GO:0006355(regulation of transcription, DNA-templated)	NA
ath-miR167a-5p	RrubChr12G00291700.1	RrubChr12G00291700	Leucine-rich acidic nuclear protein [Handroanthus impetiginosus]	GO:0005634(nucleus);GO:0008150(biological_process)	NA
ath-miR167a-5p	RrubChr12G00293190.1	RrubChr12G00293190	hypothetical protein CDL12_06927 [Handroanthus impetiginosus]	GO:0003677(DNA binding);GO:0003700(DNA binding transcription factor activity);GO:0005515(protein binding);GO:0005634(nucleus);GO:0006351(transcription, DNA-templated);GO:0006355(regulation of transcription, DNA-templated);GO:0009733(response to auxin);GO:0009734(auxin-activated signaling pathway);GO:0009908(flower development)	ko04075(Plant hormone signal transduction)
ath-miR167a-5p	RrubChr12G00293570.1	RrubChr12G00293570	uncharacterized protein LOC105168118 [Sesamum indicum]	GO:0003674(molecular_function);GO:0009507(chloroplast)	NA
ath-miR167a-5p	RrubChr1G00001030.1	RrubChr1G00001030	uncharacterized protein At1g04910-like [Sesamum indicum]	GO:0005794(Golgi apparatus);GO:0006004(fucose metabolic process);GO:0006486(protein glycosylation);GO:0016021(integral component of membrane);GO:0016757(transferase activity, transferring glycosyl groups)	NA
ath-miR167a-5p	RrubChr1G00001740.1	RrubChr1G00001740	auxin response factor 6 isoform X1 [Sesamum indicum]	GO:0003677(DNA binding);GO:0003700(DNA binding transcription factor activity);GO:0005515(protein binding);GO:0005634(nucleus);GO:0006351(transcription, DNA-templated);GO:0006355(regulation of transcription, DNA-templated);GO:0009733(response to auxin);GO:0009734(auxin-activated signaling pathway);GO:0009908(flower development)	ko04075(Plant hormone signal transduction)
ath-miR167a-5p	RrubChr1G00006310.1	RrubChr1G00006310	hypothetical protein CDL12_14827 [Handroanthus impetiginosus]	GO:0003700(DNA binding transcription factor activity);GO:0005515(protein binding);GO:0005634(nucleus);GO:0006351(transcription, DNA-templated);GO:0006355(regulation of transcription, DNA-templated);GO:0009733(response to auxin);GO:0009734(auxin-activated signaling pathway);GO:0009908(flower development);GO:0043565(sequence-specific DNA binding)	ko04075(Plant hormone signal transduction)
ath-miR167a-5p	RrubChr2G00029720.1	RrubChr2G00029720	Prosaposin [Handroanthus impetiginosus]	GO:0001664(G-protein coupled receptor binding);GO:0005737(cytoplasm);GO:0008047(enzyme activator activity)	NA
ath-miR167a-5p	RrubChr2G00032540.1	RrubChr2G00032540	PREDICTED: nudix hydrolase 17, mitochondrial-like [Erythranthe guttata]	GO:0005634(nucleus);GO:0005737(cytoplasm);GO:0005739(mitochondrion);GO:0016787(hydrolase activity);GO:0016818(hydrolase activity, acting on acid anhydrides, in phosphorus-containing anhydrides);GO:0046872(metal ion binding)	NA
ath-miR167a-5p	RrubChr2G00049340.1	RrubChr2G00049340	H+/oligopeptide symporter [Handroanthus impetiginosus]	GO:0005215(transporter activity);GO:0005886(plasma membrane);GO:0006857(oligopeptide transport);GO:0016020(membrane);GO:0016021(integral component of membrane);GO:0022857(transmembrane transporter activity);GO:0055085(transmembrane transport)	NA
ath-miR167a-5p	RrubChr7G00173470.1	RrubChr7G00173470	GDP-mannose 3,5-epimerase 2 [Arachis duranensis]	GO:0003824(catalytic activity);GO:0005737(cytoplasm);GO:0005829(cytosol);GO:0009225(nucleotide-sugar metabolic process);GO:0019853(L-ascorbic acid biosynthetic process);GO:0047918(GDP-mannose 3,5-epimerase activity);GO:0051287(NAD binding)	ko00053(Ascorbate and aldarate metabolism);ko00520(Amino sugar and nucleotide sugar metabolism)
ath-miR167a-5p	RrubChr8G00191280.1	RrubChr8G00191280	hypothetical protein CDL12_09885 [Handroanthus impetiginosus]	GO:0003677(DNA binding);GO:0003700(DNA binding transcription factor activity);GO:0005515(protein binding);GO:0005634(nucleus);GO:0006351(transcription, DNA-templated);GO:0006355(regulation of transcription, DNA-templated);GO:0009733(response to auxin);GO:0009734(auxin-activated signaling pathway);GO:0009908(flower development)	ko04075(Plant hormone signal transduction)
ath-miR167a-5p	RrubChr4G00090930.1	RrubChr4G00090930	hypothetical protein MIMGU_mgv1a012969mg [Erythranthe guttata]	GO:0000103(sulfate assimilation);GO:0005737(cytoplasm);GO:0006457(protein folding);GO:0015035(protein disulfide oxidoreductase activity);GO:0016671(oxidoreductase activity, acting on a sulfur group of donors, disulfide as acceptor);GO:0034599(cellular response to oxidative stress);GO:0045454(cell redox homeostasis);GO:0055114(oxidation-reduction process)	NA
ath-miR167a-5p	RrubChr7G00180400.1	RrubChr7G00180400	PREDICTED: 3-dehydroquinate synthase, chloroplastic [Erythranthe guttata]	GO:0003856(3-dehydroquinate synthase activity);GO:0005737(cytoplasm);GO:0009073(aromatic amino acid family biosynthetic process);GO:0009423(chorismate biosynthetic process);GO:0033587(shikimate biosynthetic process)	ko00400(Phenylalanine, tyrosine and tryptophan biosynthesis)
ath-miR167c-5p_L+1R-1_2ss2TA21TA	RrubChr11G00274770.1	RrubChr11G00274770	hypothetical protein CDL12_14827 [Handroanthus impetiginosus]	GO:0003700(DNA binding transcription factor activity);GO:0005515(protein binding);GO:0005634(nucleus);GO:0006351(transcription, DNA-templated);GO:0006355(regulation of transcription, DNA-templated);GO:0009733(response to auxin);GO:0009734(auxin-activated signaling pathway);GO:0009908(flower development);GO:0043565(sequence-specific DNA binding)	ko04075(Plant hormone signal transduction)
ath-miR167c-5p_L+1R-1_2ss2TA21TA	RrubChr12G00283260.1	RrubChr12G00283260	hypothetical protein CDL12_21678 [Handroanthus impetiginosus]	GO:0003677(DNA binding);GO:0005634(nucleus);GO:0006351(transcription, DNA-templated);GO:0006355(regulation of transcription, DNA-templated)	NA
ath-miR167c-5p_L+1R-1_2ss2TA21TA	RrubChr12G00293190.1	RrubChr12G00293190	hypothetical protein CDL12_06927 [Handroanthus impetiginosus]	GO:0003677(DNA binding);GO:0003700(DNA binding transcription factor activity);GO:0005515(protein binding);GO:0005634(nucleus);GO:0006351(transcription, DNA-templated);GO:0006355(regulation of transcription, DNA-templated);GO:0009733(response to auxin);GO:0009734(auxin-activated signaling pathway);GO:0009908(flower development)	ko04075(Plant hormone signal transduction)
ath-miR167c-5p_L+1R-1_2ss2TA21TA	RrubChr1G00001030.1	RrubChr1G00001030	uncharacterized protein At1g04910-like [Sesamum indicum]	GO:0005794(Golgi apparatus);GO:0006004(fucose metabolic process);GO:0006486(protein glycosylation);GO:0016021(integral component of membrane);GO:0016757(transferase activity, transferring glycosyl groups)	NA
ath-miR167c-5p_L+1R-1_2ss2TA21TA	RrubChr1G00001740.1	RrubChr1G00001740	auxin response factor 6 isoform X1 [Sesamum indicum]	GO:0003677(DNA binding);GO:0003700(DNA binding transcription factor activity);GO:0005515(protein binding);GO:0005634(nucleus);GO:0006351(transcription, DNA-templated);GO:0006355(regulation of transcription, DNA-templated);GO:0009733(response to auxin);GO:0009734(auxin-activated signaling pathway);GO:0009908(flower development)	ko04075(Plant hormone signal transduction)
ath-miR167c-5p_L+1R-1_2ss2TA21TA	RrubChr1G00006310.1	RrubChr1G00006310	hypothetical protein CDL12_14827 [Handroanthus impetiginosus]	GO:0003700(DNA binding transcription factor activity);GO:0005515(protein binding);GO:0005634(nucleus);GO:0006351(transcription, DNA-templated);GO:0006355(regulation of transcription, DNA-templated);GO:0009733(response to auxin);GO:0009734(auxin-activated signaling pathway);GO:0009908(flower development);GO:0043565(sequence-specific DNA binding)	ko04075(Plant hormone signal transduction)
ath-miR167c-5p_L+1R-1_2ss2TA21TA	RrubChr7G00188290.1	RrubChr7G00188290	monodehydroascorbate reductase 4, peroxisomal [Sesamum indicum]	GO:0005737(cytoplasm);GO:0005778(peroxisomal membrane);GO:0009941(chloroplast envelope);GO:0016021(integral component of membrane);GO:0016656(monodehydroascorbate reductase (NADH) activity);GO:0042744(hydrogen peroxide catabolic process);GO:0050660(flavin adenine dinucleotide binding);GO:0055114(oxidation-reduction process)	ko00053(Ascorbate and aldarate metabolism)
ath-miR167c-5p_L+1R-1_2ss2TA21TA	RrubChr8G00191280.1	RrubChr8G00191280	hypothetical protein CDL12_09885 [Handroanthus impetiginosus]	GO:0003677(DNA binding);GO:0003700(DNA binding transcription factor activity);GO:0005515(protein binding);GO:0005634(nucleus);GO:0006351(transcription, DNA-templated);GO:0006355(regulation of transcription, DNA-templated);GO:0009733(response to auxin);GO:0009734(auxin-activated signaling pathway);GO:0009908(flower development)	ko04075(Plant hormone signal transduction)
ath-miR167d_1ss22GC	RrubChr11G00274770.1	RrubChr11G00274770	hypothetical protein CDL12_14827 [Handroanthus impetiginosus]	GO:0003700(DNA binding transcription factor activity);GO:0005515(protein binding);GO:0005634(nucleus);GO:0006351(transcription, DNA-templated);GO:0006355(regulation of transcription, DNA-templated);GO:0009733(response to auxin);GO:0009734(auxin-activated signaling pathway);GO:0009908(flower development);GO:0043565(sequence-specific DNA binding)	ko04075(Plant hormone signal transduction)
ath-miR167d_1ss22GC	RrubChr12G00283260.1	RrubChr12G00283260	hypothetical protein CDL12_21678 [Handroanthus impetiginosus]	GO:0003677(DNA binding);GO:0005634(nucleus);GO:0006351(transcription, DNA-templated);GO:0006355(regulation of transcription, DNA-templated)	NA
ath-miR167d_1ss22GC	RrubChr12G00293190.1	RrubChr12G00293190	hypothetical protein CDL12_06927 [Handroanthus impetiginosus]	GO:0003677(DNA binding);GO:0003700(DNA binding transcription factor activity);GO:0005515(protein binding);GO:0005634(nucleus);GO:0006351(transcription, DNA-templated);GO:0006355(regulation of transcription, DNA-templated);GO:0009733(response to auxin);GO:0009734(auxin-activated signaling pathway);GO:0009908(flower development)	ko04075(Plant hormone signal transduction)
ath-miR167d_1ss22GC	RrubChr1G00001030.1	RrubChr1G00001030	uncharacterized protein At1g04910-like [Sesamum indicum]	GO:0005794(Golgi apparatus);GO:0006004(fucose metabolic process);GO:0006486(protein glycosylation);GO:0016021(integral component of membrane);GO:0016757(transferase activity, transferring glycosyl groups)	NA
ath-miR167d_1ss22GC	RrubChr1G00001740.1	RrubChr1G00001740	auxin response factor 6 isoform X1 [Sesamum indicum]	GO:0003677(DNA binding);GO:0003700(DNA binding transcription factor activity);GO:0005515(protein binding);GO:0005634(nucleus);GO:0006351(transcription, DNA-templated);GO:0006355(regulation of transcription, DNA-templated);GO:0009733(response to auxin);GO:0009734(auxin-activated signaling pathway);GO:0009908(flower development)	ko04075(Plant hormone signal transduction)
ath-miR167d_1ss22GC	RrubChr1G00006310.1	RrubChr1G00006310	hypothetical protein CDL12_14827 [Handroanthus impetiginosus]	GO:0003700(DNA binding transcription factor activity);GO:0005515(protein binding);GO:0005634(nucleus);GO:0006351(transcription, DNA-templated);GO:0006355(regulation of transcription, DNA-templated);GO:0009733(response to auxin);GO:0009734(auxin-activated signaling pathway);GO:0009908(flower development);GO:0043565(sequence-specific DNA binding)	ko04075(Plant hormone signal transduction)
ath-miR167d_1ss22GC	RrubChr2G00032540.1	RrubChr2G00032540	PREDICTED: nudix hydrolase 17, mitochondrial-like [Erythranthe guttata]	GO:0005634(nucleus);GO:0005737(cytoplasm);GO:0005739(mitochondrion);GO:0016787(hydrolase activity);GO:0016818(hydrolase activity, acting on acid anhydrides, in phosphorus-containing anhydrides);GO:0046872(metal ion binding)	NA
ath-miR167d_1ss22GC	RrubChr6G00158780.1	RrubChr6G00158780	zinc finger A20 and AN1 domain-containing stress-associated protein 8-like [Sesamum indicum]	GO:0003677(DNA binding);GO:0005634(nucleus);GO:0008150(biological_process);GO:0008270(zinc ion binding)	NA
ath-miR167d_1ss22GC	RrubChr8G00191280.1	RrubChr8G00191280	hypothetical protein CDL12_09885 [Handroanthus impetiginosus]	GO:0003677(DNA binding);GO:0003700(DNA binding transcription factor activity);GO:0005515(protein binding);GO:0005634(nucleus);GO:0006351(transcription, DNA-templated);GO:0006355(regulation of transcription, DNA-templated);GO:0009733(response to auxin);GO:0009734(auxin-activated signaling pathway);GO:0009908(flower development)	ko04075(Plant hormone signal transduction)
ath-miR167d_1ss22GC	RrubChr5G00114200.1	RrubChr5G00114200	photosynthetic NDH subunit of lumenal location 1, chloroplastic [Sesamum indicum]	GO:0005509(calcium ion binding);GO:0009507(chloroplast);GO:0009535(chloroplast thylakoid membrane);GO:0009543(chloroplast thylakoid lumen);GO:0009579(thylakoid);GO:0009654(photosystem II oxygen evolving complex);GO:0015979(photosynthesis);GO:0019898(extrinsic component of membrane);GO:0030095(chloroplast photosystem II)	ko00195(Photosynthesis)
ath-miR167d_R-1	RrubChr11G00274770.1	RrubChr11G00274770	hypothetical protein CDL12_14827 [Handroanthus impetiginosus]	GO:0003700(DNA binding transcription factor activity);GO:0005515(protein binding);GO:0005634(nucleus);GO:0006351(transcription, DNA-templated);GO:0006355(regulation of transcription, DNA-templated);GO:0009733(response to auxin);GO:0009734(auxin-activated signaling pathway);GO:0009908(flower development);GO:0043565(sequence-specific DNA binding)	ko04075(Plant hormone signal transduction)
ath-miR167d_R-1	RrubChr12G00283260.1	RrubChr12G00283260	hypothetical protein CDL12_21678 [Handroanthus impetiginosus]	GO:0003677(DNA binding);GO:0005634(nucleus);GO:0006351(transcription, DNA-templated);GO:0006355(regulation of transcription, DNA-templated)	NA
ath-miR167d_R-1	RrubChr12G00291700.1	RrubChr12G00291700	Leucine-rich acidic nuclear protein [Handroanthus impetiginosus]	GO:0005634(nucleus);GO:0008150(biological_process)	NA
ath-miR167d_R-1	RrubChr12G00293190.1	RrubChr12G00293190	hypothetical protein CDL12_06927 [Handroanthus impetiginosus]	GO:0003677(DNA binding);GO:0003700(DNA binding transcription factor activity);GO:0005515(protein binding);GO:0005634(nucleus);GO:0006351(transcription, DNA-templated);GO:0006355(regulation of transcription, DNA-templated);GO:0009733(response to auxin);GO:0009734(auxin-activated signaling pathway);GO:0009908(flower development)	ko04075(Plant hormone signal transduction)
ath-miR167d_R-1	RrubChr12G00293570.1	RrubChr12G00293570	uncharacterized protein LOC105168118 [Sesamum indicum]	GO:0003674(molecular_function);GO:0009507(chloroplast)	NA
ath-miR167d_R-1	RrubChr1G00001030.1	RrubChr1G00001030	uncharacterized protein At1g04910-like [Sesamum indicum]	GO:0005794(Golgi apparatus);GO:0006004(fucose metabolic process);GO:0006486(protein glycosylation);GO:0016021(integral component of membrane);GO:0016757(transferase activity, transferring glycosyl groups)	NA
ath-miR167d_R-1	RrubChr1G00001740.1	RrubChr1G00001740	auxin response factor 6 isoform X1 [Sesamum indicum]	GO:0003677(DNA binding);GO:0003700(DNA binding transcription factor activity);GO:0005515(protein binding);GO:0005634(nucleus);GO:0006351(transcription, DNA-templated);GO:0006355(regulation of transcription, DNA-templated);GO:0009733(response to auxin);GO:0009734(auxin-activated signaling pathway);GO:0009908(flower development)	ko04075(Plant hormone signal transduction)
ath-miR167d_R-1	RrubChr1G00006310.1	RrubChr1G00006310	hypothetical protein CDL12_14827 [Handroanthus impetiginosus]	GO:0003700(DNA binding transcription factor activity);GO:0005515(protein binding);GO:0005634(nucleus);GO:0006351(transcription, DNA-templated);GO:0006355(regulation of transcription, DNA-templated);GO:0009733(response to auxin);GO:0009734(auxin-activated signaling pathway);GO:0009908(flower development);GO:0043565(sequence-specific DNA binding)	ko04075(Plant hormone signal transduction)
ath-miR167d_R-1	RrubChr2G00032540.1	RrubChr2G00032540	PREDICTED: nudix hydrolase 17, mitochondrial-like [Erythranthe guttata]	GO:0005634(nucleus);GO:0005737(cytoplasm);GO:0005739(mitochondrion);GO:0016787(hydrolase activity);GO:0016818(hydrolase activity, acting on acid anhydrides, in phosphorus-containing anhydrides);GO:0046872(metal ion binding)	NA
ath-miR167d_R-1	RrubChr2G00049340.1	RrubChr2G00049340	H+/oligopeptide symporter [Handroanthus impetiginosus]	GO:0005215(transporter activity);GO:0005886(plasma membrane);GO:0006857(oligopeptide transport);GO:0016020(membrane);GO:0016021(integral component of membrane);GO:0022857(transmembrane transporter activity);GO:0055085(transmembrane transport)	NA
ath-miR167d_R-1	RrubChr7G00173470.1	RrubChr7G00173470	GDP-mannose 3,5-epimerase 2 [Arachis duranensis]	GO:0003824(catalytic activity);GO:0005737(cytoplasm);GO:0005829(cytosol);GO:0009225(nucleotide-sugar metabolic process);GO:0019853(L-ascorbic acid biosynthetic process);GO:0047918(GDP-mannose 3,5-epimerase activity);GO:0051287(NAD binding)	ko00053(Ascorbate and aldarate metabolism);ko00520(Amino sugar and nucleotide sugar metabolism)
ath-miR167d_R-1	RrubChr8G00191280.1	RrubChr8G00191280	hypothetical protein CDL12_09885 [Handroanthus impetiginosus]	GO:0003677(DNA binding);GO:0003700(DNA binding transcription factor activity);GO:0005515(protein binding);GO:0005634(nucleus);GO:0006351(transcription, DNA-templated);GO:0006355(regulation of transcription, DNA-templated);GO:0009733(response to auxin);GO:0009734(auxin-activated signaling pathway);GO:0009908(flower development)	ko04075(Plant hormone signal transduction)
ath-miR167d_R-1	RrubChr7G00180400.1	RrubChr7G00180400	PREDICTED: 3-dehydroquinate synthase, chloroplastic [Erythranthe guttata]	GO:0003856(3-dehydroquinate synthase activity);GO:0005737(cytoplasm);GO:0009073(aromatic amino acid family biosynthetic process);GO:0009423(chorismate biosynthetic process);GO:0033587(shikimate biosynthetic process)	ko00400(Phenylalanine, tyrosine and tryptophan biosynthesis)
ath-miR168a-3p	RrubChr12G00289350.1	RrubChr12G00289350	Protein involved in vacuole import and degradation [Handroanthus impetiginosus]	GO:0003674(molecular_function);GO:0005737(cytoplasm)	NA
ath-miR168a-5p	RrubChr10G00242820.1	RrubChr10G00242820	glutelin type-B 5-like [Sesamum indicum]	GO:0005507(copper ion binding);GO:0005794(Golgi apparatus);GO:0005829(cytosol);GO:0008150(biological_process);GO:0008270(zinc ion binding);GO:0009506(plasmodesma);GO:0045735(nutrient reservoir activity)	ko00630(Glyoxylate and dicarboxylate metabolism)
ath-miR168a-5p	RrubChr1G00000510.1	RrubChr1G00000510	argonaute 1 [Salvia miltiorrhiza]	GO:0005515(protein binding)	NA
ath-miR168a-5p	RrubChr3G00075820.1	RrubChr3G00075820	LOW QUALITY PROTEIN: linoleate 13S-lipoxygenase 3-1, chloroplastic [Sesamum indicum]	GO:0016165(linoleate 13S-lipoxygenase activity)	ko00591(Linoleic acid metabolism);ko00592(alpha-Linolenic acid metabolism)
ath-miR168a-5p	RrubChr3G00084100.1	RrubChr3G00084100	uncharacterized protein LOC105171105 isoform X1 [Sesamum indicum]	GO:0003674(molecular_function);GO:0005634(nucleus);GO:0008150(biological_process)	NA
ath-miR168a-5p	RrubChr7G00173480.1	RrubChr7G00173480	3-ketoacyl-CoA synthase 11-like [Sesamum indicum]	GO:0005634(nucleus);GO:0006633(fatty acid biosynthetic process);GO:0009409(response to cold);GO:0009416(response to light stimulus);GO:0016021(integral component of membrane);GO:0102336(3-oxo-arachidoyl-CoA synthase activity);GO:0102337(3-oxo-cerotoyl-CoA synthase activity);GO:0102338(3-oxo-lignoceronyl-CoA synthase activity);GO:0102756(very-long-chain 3-ketoacyl-CoA synthase activity)	ko00062(Fatty acid elongation)
ath-miR168a-5p	RrubChr8G00209170.1	RrubChr8G00209170	transcription factor VOZ1, partial [Sesamum indicum]	GO:0005515(protein binding);GO:0005634(nucleus);GO:0005737(cytoplasm);GO:0006351(transcription, DNA-templated);GO:0009408(response to heat);GO:0009414(response to water deprivation);GO:0009585(red, far-red light phototransduction);GO:0009631(cold acclimation);GO:0009816(defense response to bacterium, incompatible interaction);GO:0043565(sequence-specific DNA binding);GO:0045893(positive regulatio…	NA
ath-miR169a-3p_R+1_1ss10TC	RrubChr2G00028920.1	RrubChr2G00028920	receptor-like protein kinase FERONIA [Sesamum indicum]	GO:0004672(protein kinase activity);GO:0004674(protein serine/threonine kinase activity);GO:0005515(protein binding);GO:0005524(ATP binding);GO:0005576(extracellular region);GO:0005886(plasma membrane);GO:0007338(single fertilization);GO:0009506(plasmodesma);GO:0009723(response to ethylene);GO:0009738(abscisic acid-activated signaling pathway);GO:0009741(response to brassinosteroid);GO:0009742(br…	NA
ath-miR169a-3p_R+1_1ss10TC	RrubChr2G00056560.1	RrubChr2G00056560	Acyl carrier protein/NADH-ubiquinone oxidoreductase, NDUFAB1/SDAP subunit [Handroanthus impetiginosus]	GO:0000035(acyl binding);GO:0000036(acyl carrier activity);GO:0005515(protein binding);GO:0005739(mitochondrion);GO:0005759(mitochondrial matrix);GO:0005829(cytosol);GO:0006633(fatty acid biosynthetic process);GO:0009245(lipid A biosynthetic process);GO:0031177(phosphopantetheine binding);GO:0046872(metal ion binding);GO:0050897(cobalt ion binding);GO:0055114(oxidation-reduction process);GO:00704…	ko00190(Oxidative phosphorylation)
ath-miR169a-3p_R+1_1ss10TC	RrubChr4G00103170.1	RrubChr4G00103170	hypothetical protein MIMGU_mgv1a000542mg [Erythranthe guttata]	GO:0004674(protein serine/threonine kinase activity);GO:0005524(ATP binding);GO:0005886(plasma membrane);GO:0006468(protein phosphorylation);GO:0007169(transmembrane receptor protein tyrosine kinase signaling pathway);GO:0016021(integral component of membrane);GO:0016301(kinase activity)	ko04016(MAPK signaling pathway - plant);ko04626(Plant-pathogen interaction)
ath-miR169a-5p	RrubChr11G00267140.1	RrubChr11G00267140	hypothetical protein CDL12_00084 [Handroanthus impetiginosus]	GO:0003677(DNA binding);GO:0003700(DNA binding transcription factor activity);GO:0005634(nucleus);GO:0006351(transcription, DNA-templated);GO:0006355(regulation of transcription, DNA-templated);GO:0009793(embryo development ending in seed dormancy);GO:0010262(somatic embryogenesis);GO:0016602(CCAAT-binding factor complex);GO:0048316(seed development);GO:0048510(regulation of timing of transition …	NA
ath-miR169a-5p	RrubChr11G00268210.1	RrubChr11G00268210	nuclear transcription factor Y subunit A-1 isoform X1 [Sesamum indicum]	GO:0003677(DNA binding);GO:0003700(DNA binding transcription factor activity);GO:0005634(nucleus);GO:0006351(transcription, DNA-templated);GO:0006355(regulation of transcription, DNA-templated);GO:0009793(embryo development ending in seed dormancy);GO:0010262(somatic embryogenesis);GO:0016602(CCAAT-binding factor complex);GO:0048316(seed development);GO:0048510(regulation of timing of transition …	NA
ath-miR169a-5p	RrubChr11G00271500.1	RrubChr11G00271500	PREDICTED: anamorsin homolog [Erythranthe guttata]	GO:0005737(cytoplasm);GO:0016226(iron-sulfur cluster assembly)	NA
ath-miR169a-5p	RrubChr12G00301910.1	RrubChr12G00301910	nuclear transcription factor Y subunit A-5 [Sesamum indicum]	GO:0003677(DNA binding);GO:0003700(DNA binding transcription factor activity);GO:0005634(nucleus);GO:0006351(transcription, DNA-templated);GO:0006355(regulation of transcription, DNA-templated);GO:0016602(CCAAT-binding factor complex)	NA
ath-miR169a-5p	RrubChr2G00046530.1	RrubChr2G00046530	hypothetical protein CDL12_17082 [Handroanthus impetiginosus]	GO:0003677(DNA binding);GO:0003700(DNA binding transcription factor activity);GO:0005634(nucleus);GO:0006351(transcription, DNA-templated);GO:0006355(regulation of transcription, DNA-templated);GO:0016602(CCAAT-binding factor complex)	NA
ath-miR169a-5p	RrubChr5G00114270.1	RrubChr5G00114270	exocyst complex component EXO70A1 [Sesamum indicum]	GO:0000145(exocyst);GO:0002237(response to molecule of bacterial origin);GO:0005515(protein binding);GO:0005634(nucleus);GO:0005829(cytosol);GO:0006887(exocytosis);GO:0006904(vesicle docking involved in exocytosis);GO:0006952(defense response);GO:0009617(response to bacterium);GO:0009620(response to fungus);GO:0012505(endomembrane system);GO:0016020(membrane);GO:0031982(vesicle);GO:0045335(phagoc…	NA
ath-miR169a-5p	RrubChr4G00101420.1	RrubChr4G00101420	IAA-alanine resistance protein 1 [Sesamum indicum]	GO:0005385(zinc ion transmembrane transporter activity);GO:0006882(cellular zinc ion homeostasis);GO:0071577(zinc II ion transmembrane transport)	NA
ath-miR169a-5p	RrubChr5G00130240.1	RrubChr5G00130240	nuclear transcription factor Y subunit A-3 isoform X4 [Sesamum indicum]	GO:0003677(DNA binding);GO:0003700(DNA binding transcription factor activity);GO:0005634(nucleus);GO:0006351(transcription, DNA-templated);GO:0006355(regulation of transcription, DNA-templated);GO:0016602(CCAAT-binding factor complex)	NA
ath-miR169h_1ss9GA	RrubChr10G00245410.1	RrubChr10G00245410	PREDICTED: uncharacterized protein LOC105948780 [Erythranthe guttata]	GO:0003674(molecular_function);GO:0005739(mitochondrion);GO:0007275(multicellular organism development);GO:0009507(chloroplast);GO:0009536(plastid);GO:0009706(chloroplast inner membrane);GO:0009941(chloroplast envelope);GO:0016021(integral component of membrane)	ko00760(Nicotinate and nicotinamide metabolism)
ath-miR169h_1ss9GA	RrubChr11G00267140.1	RrubChr11G00267140	hypothetical protein CDL12_00084 [Handroanthus impetiginosus]	GO:0003677(DNA binding);GO:0003700(DNA binding transcription factor activity);GO:0005634(nucleus);GO:0006351(transcription, DNA-templated);GO:0006355(regulation of transcription, DNA-templated);GO:0009793(embryo development ending in seed dormancy);GO:0010262(somatic embryogenesis);GO:0016602(CCAAT-binding factor complex);GO:0048316(seed development);GO:0048510(regulation of timing of transition …	NA
ath-miR169h_1ss9GA	RrubChr11G00268210.1	RrubChr11G00268210	nuclear transcription factor Y subunit A-1 isoform X1 [Sesamum indicum]	GO:0003677(DNA binding);GO:0003700(DNA binding transcription factor activity);GO:0005634(nucleus);GO:0006351(transcription, DNA-templated);GO:0006355(regulation of transcription, DNA-templated);GO:0009793(embryo development ending in seed dormancy);GO:0010262(somatic embryogenesis);GO:0016602(CCAAT-binding factor complex);GO:0048316(seed development);GO:0048510(regulation of timing of transition …	NA
ath-miR169h_1ss9GA	RrubChr11G00271500.1	RrubChr11G00271500	PREDICTED: anamorsin homolog [Erythranthe guttata]	GO:0005737(cytoplasm);GO:0016226(iron-sulfur cluster assembly)	NA
ath-miR169h_1ss9GA	RrubChr2G00046530.1	RrubChr2G00046530	hypothetical protein CDL12_17082 [Handroanthus impetiginosus]	GO:0003677(DNA binding);GO:0003700(DNA binding transcription factor activity);GO:0005634(nucleus);GO:0006351(transcription, DNA-templated);GO:0006355(regulation of transcription, DNA-templated);GO:0016602(CCAAT-binding factor complex)	NA
ath-miR169h_1ss9GA	RrubChr3G00064650.1	RrubChr3G00064650	cellulose synthase A catalytic subunit 4 [UDP-forming] [Sesamum indicum]	GO:0000977(RNA polymerase II regulatory region sequence-specific DNA binding);GO:0005515(protein binding);GO:0005794(Golgi apparatus);GO:0005886(plasma membrane);GO:0009832(plant-type cell wall biogenesis);GO:0009833(plant-type primary cell wall biogenesis);GO:0009834(plant-type secondary cell wall biogenesis);GO:0009863(salicylic acid mediated signaling pathway);GO:0009867(jasmonic acid mediated…	NA
ath-miR169h_R+1_1ss8GA	RrubChr2G00046530.1	RrubChr2G00046530	hypothetical protein CDL12_17082 [Handroanthus impetiginosus]	GO:0003677(DNA binding);GO:0003700(DNA binding transcription factor activity);GO:0005634(nucleus);GO:0006351(transcription, DNA-templated);GO:0006355(regulation of transcription, DNA-templated);GO:0016602(CCAAT-binding factor complex)	NA
ath-miR171a-3p	RrubChr11G00271690.1	RrubChr11G00271690	PREDICTED: scopoletin glucosyltransferase-like [Erythranthe guttata]	GO:0009813(flavonoid biosynthetic process);GO:0043231(intracellular membrane-bounded organelle);GO:0052696(flavonoid glucuronidation);GO:0080043(quercetin 3-O-glucosyltransferase activity);GO:0080044(quercetin 7-O-glucosyltransferase activity)	NA
ath-miR171a-3p	RrubChr6G00144710.1	RrubChr6G00144710	hypothetical protein CDL12_17752 [Handroanthus impetiginosus]	GO:0003700(DNA binding transcription factor activity);GO:0005634(nucleus);GO:0006355(regulation of transcription, DNA-templated);GO:0010492(maintenance of shoot apical meristem identity);GO:0043565(sequence-specific DNA binding);GO:0048768(root hair cell tip growth);GO:0051301(cell division)	ko04075(Plant hormone signal transduction)
ath-miR171a-3p	RrubChr12G00292840.1	RrubChr12G00292840	cytochrome P450 CYP71AT87 [Plectranthus barbatus]	GO:0016020(membrane);GO:0016709(oxidoreductase activity, acting on paired donors, with incorporation or reduction of molecular oxygen, NAD(P)H as one donor, and incorporation of one atom of oxygen);GO:0044550(secondary metabolite biosynthetic process)	NA
ath-miR171a-3p	RrubChr7G00182440.1	RrubChr7G00182440	formin-like protein 6 [Sesamum indicum]	GO:0003779(actin binding);GO:0005618(cell wall);GO:0005634(nucleus);GO:0005730(nucleolus);GO:0005737(cytoplasm);GO:0005819(spindle);GO:0005886(plasma membrane);GO:0009524(phragmoplast);GO:0016021(integral component of membrane)	NA
ath-miR171b-3p_R+1	RrubChr6G00144710.1	RrubChr6G00144710	hypothetical protein CDL12_17752 [Handroanthus impetiginosus]	GO:0003700(DNA binding transcription factor activity);GO:0005634(nucleus);GO:0006355(regulation of transcription, DNA-templated);GO:0010492(maintenance of shoot apical meristem identity);GO:0043565(sequence-specific DNA binding);GO:0048768(root hair cell tip growth);GO:0051301(cell division)	ko04075(Plant hormone signal transduction)
ath-miR172a	RrubChr12G00287780.1	RrubChr12G00287780	AAA+-type ATPase [Handroanthus impetiginosus]	GO:0002237(response to molecule of bacterial origin);GO:0005524(ATP binding);GO:0005739(mitochondrion);GO:0005740(mitochondrial envelope);GO:0005741(mitochondrial outer membrane);GO:0005886(plasma membrane);GO:0008219(cell death);GO:0009411(response to UV);GO:0009617(response to bacterium);GO:0009626(plant-type hypersensitive response);GO:0009863(salicylic acid mediated signaling pathway);GO:0016…	NA
ath-miR172a	RrubChr12G00293060.1	RrubChr12G00293060	CONSTANS-like protein 9 [Tectona grandis]	GO:0003700(DNA binding transcription factor activity);GO:0005515(protein binding);GO:0005634(nucleus);GO:0006355(regulation of transcription, DNA-templated);GO:0007623(circadian rhythm);GO:0008270(zinc ion binding);GO:0048579(negative regulation of long-day photoperiodism, flowering)	ko04712(Circadian rhythm - plant)
ath-miR172a	RrubChr1G00013440.1	RrubChr1G00013440	hypothetical protein CDL12_17238 [Handroanthus impetiginosus]	GO:0003677(DNA binding);GO:0003700(DNA binding transcription factor activity);GO:0005634(nucleus);GO:0006351(transcription, DNA-templated);GO:0006355(regulation of transcription, DNA-templated);GO:0009873(ethylene-activated signaling pathway);GO:0045893(positive regulation of transcription, DNA-templated);GO:0048510(regulation of timing of transition from vegetative to reproductive phase)	ko03040(Spliceosome)
ath-miR172a	RrubChr2G00032200.1	RrubChr2G00032200	F-box/FBD/LRR-repeat protein At1g13570 isoform X3 [Sesamum indicum]	GO:0003674(molecular_function);GO:0005575(cellular_component);GO:0008150(biological_process)	NA
ath-miR172a	RrubChr2G00044970.1	RrubChr2G00044970	hypothetical protein CDL12_12492 [Handroanthus impetiginosus]	GO:0003674(molecular_function);GO:0005634(nucleus);GO:0008150(biological_process)	NA
ath-miR172a	RrubChr2G00045560.1	RrubChr2G00045560	auxin response factor 19 [Sesamum indicum]	GO:0003677(DNA binding);GO:0003700(DNA binding transcription factor activity);GO:0005515(protein binding);GO:0005634(nucleus);GO:0006351(transcription, DNA-templated);GO:0006355(regulation of transcription, DNA-templated);GO:0009723(response to ethylene);GO:0009733(response to auxin);GO:0009734(auxin-activated signaling pathway);GO:0010311(lateral root formation);GO:0043565(sequence-specific DNA …	ko04075(Plant hormone signal transduction)
ath-miR172a	RrubChr2G00047360.1	RrubChr2G00047360	peroxiredoxin-2E-1, chloroplastic [Sesamum indicum]	GO:0004601(peroxidase activity);GO:0009505(plant-type cell wall);GO:0009507(chloroplast);GO:0009536(plastid);GO:0009570(chloroplast stroma);GO:0009579(thylakoid);GO:0009941(chloroplast envelope);GO:0016209(antioxidant activity);GO:0042742(defense response to bacterium);GO:0045454(cell redox homeostasis);GO:0051920(peroxiredoxin activity);GO:0055114(oxidation-reduction process)	NA
ath-miR172a	RrubChr3G00058380.1	RrubChr3G00058380	AP10/EREBP Transcription Factors [Salvia miltiorrhiza]	GO:0010227(floral organ abscission);GO:0048316(seed development);GO:0048461(flower structural organization);GO:0080187(floral organ senescence)	NA
ath-miR172a	RrubChr3G00062600.1	RrubChr3G00062600	hypothetical protein CDL12_22001 [Handroanthus impetiginosus]	NA	NA
ath-miR172a	RrubChr4G00095940.1	RrubChr4G00095940	VQ motif-containing protein 9-like isoform X2 [Sesamum indicum]	GO:0005515(protein binding);GO:0005634(nucleus);GO:0006883(cellular sodium ion homeostasis);GO:0030007(cellular potassium ion homeostasis);GO:0043433(negative regulation of DNA binding transcription factor activity);GO:1901001(negative regulation of response to salt stress)	NA
ath-miR172a	RrubChr4G00100940.1	RrubChr4G00100940	hypothetical protein CDL12_22502 [Handroanthus impetiginosus]	GO:0005774(vacuolar membrane);GO:0005829(cytosol);GO:0043550(regulation of lipid kinase activity);GO:0070772(PAS complex)	NA
ath-miR172a	RrubChr5G00128760.1	RrubChr5G00128760	probable galactinol--sucrose galactosyltransferase 6 [Sesamum indicum]	GO:0003824(catalytic activity);GO:0004553(hydrolase activity, hydrolyzing O-glycosyl compounds);GO:0005737(cytoplasm);GO:0006979(response to oxidative stress);GO:0009506(plasmodesma);GO:0034484(raffinose catabolic process);GO:0047274(galactinol-sucrose galactosyltransferase activity);GO:0052692(raffinose alpha-galactosidase activity);GO:0080167(response to karrikin)	ko00052(Galactose metabolism)
ath-miR172a	RrubChr7G00176740.1	RrubChr7G00176740	anthocyanidin 3-O-glucoside 6''-O-acyltransferase-like isoform X1 [Olea europaea var. sylvestris]	GO:0033810(anthocyanin 5-O-glucoside 6'''-O-malonyltransferase activity)	ko00942(Anthocyanin biosynthesis)
ath-miR172a	RrubChr7G00178760.1	RrubChr7G00178760	F-box protein FBW2 [Sesamum indicum]	GO:0004842(ubiquitin-protein transferase activity);GO:0005515(protein binding);GO:0005634(nucleus);GO:0006511(ubiquitin-dependent protein catabolic process);GO:0009737(response to abscisic acid);GO:0010608(posttranscriptional regulation of gene expression);GO:0010629(negative regulation of gene expression);GO:0016567(protein ubiquitination)	NA
ath-miR172a	RrubChr7G00183080.1	RrubChr7G00183080	PREDICTED: transcription factor APETALA2 isoform X1 [Vitis vinifera]	GO:0003677(DNA binding);GO:0003700(DNA binding transcription factor activity);GO:0005634(nucleus);GO:0006351(transcription, DNA-templated);GO:0006355(regulation of transcription, DNA-templated);GO:0009908(flower development);GO:0010073(meristem maintenance);GO:0010093(specification of floral organ identity);GO:0019953(sexual reproduction);GO:0030154(cell differentiation);GO:0048316(seed developme…	NA
ath-miR172a	RrubChr8G00210690.1	RrubChr8G00210690	uncharacterized protein LOC105165423 [Sesamum indicum]	GO:0003674(molecular_function);GO:0005634(nucleus);GO:0008150(biological_process)	NA
ath-miR172a	RrubChr9G00216710.1	RrubChr9G00216710	ethylene-responsive transcription factor RAP2-7 isoform X1 [Sesamum indicum]	GO:0003677(DNA binding);GO:0003700(DNA binding transcription factor activity);GO:0005634(nucleus);GO:0006351(transcription, DNA-templated);GO:0006355(regulation of transcription, DNA-templated);GO:0009908(flower development);GO:0010073(meristem maintenance);GO:0010093(specification of floral organ identity);GO:0019953(sexual reproduction);GO:0030154(cell differentiation);GO:0048316(seed developme…	NA
ath-miR172a	RrubChr1G00001580.1	RrubChr1G00001580	CBL-interacting protein kinase 23 [Sesamum indicum]	GO:0004674(protein serine/threonine kinase activity);GO:0005634(nucleus);GO:0005737(cytoplasm);GO:0006468(protein phosphorylation);GO:0035556(intracellular signal transduction)	NA
ath-miR172a	RrubChr2G00048430.1	RrubChr2G00048430	hypothetical protein CDL12_22382 [Handroanthus impetiginosus]	GO:0003677(DNA binding);GO:0003700(DNA binding transcription factor activity);GO:0005634(nucleus);GO:0006351(transcription, DNA-templated);GO:0006355(regulation of transcription, DNA-templated);GO:0009908(flower development);GO:0010073(meristem maintenance);GO:0010093(specification of floral organ identity);GO:0019953(sexual reproduction);GO:0030154(cell differentiation);GO:0048316(seed developme…	NA
ath-miR172a_R+1	RrubChr12G00285080.1	RrubChr12G00285080	65-kDa microtubule-associated protein 1 [Sesamum indicum]	GO:0000226(microtubule cytoskeleton organization);GO:0000911(cytokinesis by cell plate formation);GO:0000922(spindle pole);GO:0005634(nucleus);GO:0005819(spindle);GO:0005874(microtubule);GO:0008017(microtubule binding);GO:0008283(cell proliferation);GO:0009524(phragmoplast);GO:0009574(preprophase band);GO:0048528(post-embryonic root development);GO:0055028(cortical microtubule);GO:0072686(mitotic…	NA
ath-miR172a_R+1	RrubChr12G00293060.1	RrubChr12G00293060	CONSTANS-like protein 9 [Tectona grandis]	GO:0003700(DNA binding transcription factor activity);GO:0005515(protein binding);GO:0005634(nucleus);GO:0006355(regulation of transcription, DNA-templated);GO:0007623(circadian rhythm);GO:0008270(zinc ion binding);GO:0048579(negative regulation of long-day photoperiodism, flowering)	ko04712(Circadian rhythm - plant)
ath-miR172a_R+1	RrubChr1G00013440.1	RrubChr1G00013440	hypothetical protein CDL12_17238 [Handroanthus impetiginosus]	GO:0003677(DNA binding);GO:0003700(DNA binding transcription factor activity);GO:0005634(nucleus);GO:0006351(transcription, DNA-templated);GO:0006355(regulation of transcription, DNA-templated);GO:0009873(ethylene-activated signaling pathway);GO:0045893(positive regulation of transcription, DNA-templated);GO:0048510(regulation of timing of transition from vegetative to reproductive phase)	ko03040(Spliceosome)
ath-miR172a_R+1	RrubChr2G00032200.1	RrubChr2G00032200	F-box/FBD/LRR-repeat protein At1g13570 isoform X3 [Sesamum indicum]	GO:0003674(molecular_function);GO:0005575(cellular_component);GO:0008150(biological_process)	NA
ath-miR172a_R+1	RrubChr2G00044970.1	RrubChr2G00044970	hypothetical protein CDL12_12492 [Handroanthus impetiginosus]	GO:0003674(molecular_function);GO:0005634(nucleus);GO:0008150(biological_process)	NA
ath-miR172a_R+1	RrubChr2G00047360.1	RrubChr2G00047360	peroxiredoxin-2E-1, chloroplastic [Sesamum indicum]	GO:0004601(peroxidase activity);GO:0009505(plant-type cell wall);GO:0009507(chloroplast);GO:0009536(plastid);GO:0009570(chloroplast stroma);GO:0009579(thylakoid);GO:0009941(chloroplast envelope);GO:0016209(antioxidant activity);GO:0042742(defense response to bacterium);GO:0045454(cell redox homeostasis);GO:0051920(peroxiredoxin activity);GO:0055114(oxidation-reduction process)	NA
ath-miR172a_R+1	RrubChr3G00058380.1	RrubChr3G00058380	AP10/EREBP Transcription Factors [Salvia miltiorrhiza]	GO:0010227(floral organ abscission);GO:0048316(seed development);GO:0048461(flower structural organization);GO:0080187(floral organ senescence)	NA
ath-miR172a_R+1	RrubChr4G00095940.1	RrubChr4G00095940	VQ motif-containing protein 9-like isoform X2 [Sesamum indicum]	GO:0005515(protein binding);GO:0005634(nucleus);GO:0006883(cellular sodium ion homeostasis);GO:0030007(cellular potassium ion homeostasis);GO:0043433(negative regulation of DNA binding transcription factor activity);GO:1901001(negative regulation of response to salt stress)	NA
ath-miR172a_R+1	RrubChr4G00097340.1	RrubChr4G00097340	ubiquitin carboxyl-terminal hydrolase 23 [Sesamum indicum]	GO:0004843(thiol-dependent ubiquitin-specific protease activity);GO:0005634(nucleus);GO:0006511(ubiquitin-dependent protein catabolic process);GO:0016579(protein deubiquitination);GO:0036459(thiol-dependent ubiquitinyl hydrolase activity)	NA
ath-miR172a_R+1	RrubChr4G00100940.1	RrubChr4G00100940	hypothetical protein CDL12_22502 [Handroanthus impetiginosus]	GO:0005774(vacuolar membrane);GO:0005829(cytosol);GO:0043550(regulation of lipid kinase activity);GO:0070772(PAS complex)	NA
ath-miR172a_R+1	RrubChr7G00176740.1	RrubChr7G00176740	anthocyanidin 3-O-glucoside 6''-O-acyltransferase-like isoform X1 [Olea europaea var. sylvestris]	GO:0033810(anthocyanin 5-O-glucoside 6'''-O-malonyltransferase activity)	ko00942(Anthocyanin biosynthesis)
ath-miR172a_R+1	RrubChr7G00178760.1	RrubChr7G00178760	F-box protein FBW2 [Sesamum indicum]	GO:0004842(ubiquitin-protein transferase activity);GO:0005515(protein binding);GO:0005634(nucleus);GO:0006511(ubiquitin-dependent protein catabolic process);GO:0009737(response to abscisic acid);GO:0010608(posttranscriptional regulation of gene expression);GO:0010629(negative regulation of gene expression);GO:0016567(protein ubiquitination)	NA
ath-miR172a_R+1	RrubChr7G00183080.1	RrubChr7G00183080	PREDICTED: transcription factor APETALA2 isoform X1 [Vitis vinifera]	GO:0003677(DNA binding);GO:0003700(DNA binding transcription factor activity);GO:0005634(nucleus);GO:0006351(transcription, DNA-templated);GO:0006355(regulation of transcription, DNA-templated);GO:0009908(flower development);GO:0010073(meristem maintenance);GO:0010093(specification of floral organ identity);GO:0019953(sexual reproduction);GO:0030154(cell differentiation);GO:0048316(seed developme…	NA
ath-miR172a_R+1	RrubChr9G00216710.1	RrubChr9G00216710	ethylene-responsive transcription factor RAP2-7 isoform X1 [Sesamum indicum]	GO:0003677(DNA binding);GO:0003700(DNA binding transcription factor activity);GO:0005634(nucleus);GO:0006351(transcription, DNA-templated);GO:0006355(regulation of transcription, DNA-templated);GO:0009908(flower development);GO:0010073(meristem maintenance);GO:0010093(specification of floral organ identity);GO:0019953(sexual reproduction);GO:0030154(cell differentiation);GO:0048316(seed developme…	NA
ath-miR172a_R+1	RrubChr1G00001580.1	RrubChr1G00001580	CBL-interacting protein kinase 23 [Sesamum indicum]	GO:0004674(protein serine/threonine kinase activity);GO:0005634(nucleus);GO:0005737(cytoplasm);GO:0006468(protein phosphorylation);GO:0035556(intracellular signal transduction)	NA
ath-miR172a_R+1	RrubChr2G00048430.1	RrubChr2G00048430	hypothetical protein CDL12_22382 [Handroanthus impetiginosus]	GO:0003677(DNA binding);GO:0003700(DNA binding transcription factor activity);GO:0005634(nucleus);GO:0006351(transcription, DNA-templated);GO:0006355(regulation of transcription, DNA-templated);GO:0009908(flower development);GO:0010073(meristem maintenance);GO:0010093(specification of floral organ identity);GO:0019953(sexual reproduction);GO:0030154(cell differentiation);GO:0048316(seed developme…	NA
ath-miR172c	RrubChr10G00253350.1	RrubChr10G00253350	G1/S-specific cyclin D [Handroanthus impetiginosus]	GO:0004693(cyclin-dependent protein serine/threonine kinase activity);GO:0005515(protein binding);GO:0005634(nucleus);GO:0007049(cell cycle);GO:0010444(guard mother cell differentiation);GO:0042127(regulation of cell proliferation);GO:0048316(seed development);GO:0051301(cell division);GO:0051726(regulation of cell cycle)	ko04075(Plant hormone signal transduction)
ath-miR172c	RrubChr1G00013440.1	RrubChr1G00013440	hypothetical protein CDL12_17238 [Handroanthus impetiginosus]	GO:0003677(DNA binding);GO:0003700(DNA binding transcription factor activity);GO:0005634(nucleus);GO:0006351(transcription, DNA-templated);GO:0006355(regulation of transcription, DNA-templated);GO:0009873(ethylene-activated signaling pathway);GO:0045893(positive regulation of transcription, DNA-templated);GO:0048510(regulation of timing of transition from vegetative to reproductive phase)	ko03040(Spliceosome)
ath-miR172c	RrubChr1G00023040.1	RrubChr1G00023040	lipid transfer protein 2 [Salvia miltiorrhiza]	GO:0009611(response to wounding);GO:0009723(response to ethylene);GO:0009751(response to salicylic acid);GO:0042542(response to hydrogen peroxide)	NA
ath-miR172c	RrubChr2G00032200.1	RrubChr2G00032200	F-box/FBD/LRR-repeat protein At1g13570 isoform X3 [Sesamum indicum]	GO:0003674(molecular_function);GO:0005575(cellular_component);GO:0008150(biological_process)	NA
ath-miR172c	RrubChr2G00047360.1	RrubChr2G00047360	peroxiredoxin-2E-1, chloroplastic [Sesamum indicum]	GO:0004601(peroxidase activity);GO:0009505(plant-type cell wall);GO:0009507(chloroplast);GO:0009536(plastid);GO:0009570(chloroplast stroma);GO:0009579(thylakoid);GO:0009941(chloroplast envelope);GO:0016209(antioxidant activity);GO:0042742(defense response to bacterium);GO:0045454(cell redox homeostasis);GO:0051920(peroxiredoxin activity);GO:0055114(oxidation-reduction process)	NA
ath-miR172c	RrubChr3G00058380.1	RrubChr3G00058380	AP10/EREBP Transcription Factors [Salvia miltiorrhiza]	GO:0010227(floral organ abscission);GO:0048316(seed development);GO:0048461(flower structural organization);GO:0080187(floral organ senescence)	NA
ath-miR172c	RrubChr3G00063090.1	RrubChr3G00063090	G-type lectin S-receptor-like serine/threonine-protein kinase At4g27290 [Sesamum indicum]	GO:0004674(protein serine/threonine kinase activity);GO:0005886(plasma membrane);GO:0006468(protein phosphorylation);GO:0006952(defense response);GO:0009506(plasmodesma)	NA
ath-miR172c	RrubChr4G00095940.1	RrubChr4G00095940	VQ motif-containing protein 9-like isoform X2 [Sesamum indicum]	GO:0005515(protein binding);GO:0005634(nucleus);GO:0006883(cellular sodium ion homeostasis);GO:0030007(cellular potassium ion homeostasis);GO:0043433(negative regulation of DNA binding transcription factor activity);GO:1901001(negative regulation of response to salt stress)	NA
ath-miR172c	RrubChr4G00097690.1	RrubChr4G00097690	Serine/threonine protein kinase [Handroanthus impetiginosus]	GO:0004674(protein serine/threonine kinase activity);GO:0005886(plasma membrane);GO:0006468(protein phosphorylation);GO:0006952(defense response);GO:0009506(plasmodesma)	NA
ath-miR172c	RrubChr4G00100940.1	RrubChr4G00100940	hypothetical protein CDL12_22502 [Handroanthus impetiginosus]	GO:0005774(vacuolar membrane);GO:0005829(cytosol);GO:0043550(regulation of lipid kinase activity);GO:0070772(PAS complex)	NA
ath-miR172c	RrubChr5G00128760.1	RrubChr5G00128760	probable galactinol--sucrose galactosyltransferase 6 [Sesamum indicum]	GO:0003824(catalytic activity);GO:0004553(hydrolase activity, hydrolyzing O-glycosyl compounds);GO:0005737(cytoplasm);GO:0006979(response to oxidative stress);GO:0009506(plasmodesma);GO:0034484(raffinose catabolic process);GO:0047274(galactinol-sucrose galactosyltransferase activity);GO:0052692(raffinose alpha-galactosidase activity);GO:0080167(response to karrikin)	ko00052(Galactose metabolism)
ath-miR172c	RrubChr7G00176740.1	RrubChr7G00176740	anthocyanidin 3-O-glucoside 6''-O-acyltransferase-like isoform X1 [Olea europaea var. sylvestris]	GO:0033810(anthocyanin 5-O-glucoside 6'''-O-malonyltransferase activity)	ko00942(Anthocyanin biosynthesis)
ath-miR172c	RrubChr7G00178760.1	RrubChr7G00178760	F-box protein FBW2 [Sesamum indicum]	GO:0004842(ubiquitin-protein transferase activity);GO:0005515(protein binding);GO:0005634(nucleus);GO:0006511(ubiquitin-dependent protein catabolic process);GO:0009737(response to abscisic acid);GO:0010608(posttranscriptional regulation of gene expression);GO:0010629(negative regulation of gene expression);GO:0016567(protein ubiquitination)	NA
ath-miR172c	RrubChr7G00183080.1	RrubChr7G00183080	PREDICTED: transcription factor APETALA2 isoform X1 [Vitis vinifera]	GO:0003677(DNA binding);GO:0003700(DNA binding transcription factor activity);GO:0005634(nucleus);GO:0006351(transcription, DNA-templated);GO:0006355(regulation of transcription, DNA-templated);GO:0009908(flower development);GO:0010073(meristem maintenance);GO:0010093(specification of floral organ identity);GO:0019953(sexual reproduction);GO:0030154(cell differentiation);GO:0048316(seed developme…	NA
ath-miR172c	RrubChr8G00205550.1	RrubChr8G00205550	scarecrow-like protein 13 [Sesamum indicum]	GO:0003700(DNA binding transcription factor activity);GO:0005634(nucleus);GO:0006355(regulation of transcription, DNA-templated);GO:0043565(sequence-specific DNA binding)	ko04075(Plant hormone signal transduction)
ath-miR172c	RrubChr8G00210690.1	RrubChr8G00210690	uncharacterized protein LOC105165423 [Sesamum indicum]	GO:0003674(molecular_function);GO:0005634(nucleus);GO:0008150(biological_process)	NA
ath-miR172c	RrubChr9G00216710.1	RrubChr9G00216710	ethylene-responsive transcription factor RAP2-7 isoform X1 [Sesamum indicum]	GO:0003677(DNA binding);GO:0003700(DNA binding transcription factor activity);GO:0005634(nucleus);GO:0006351(transcription, DNA-templated);GO:0006355(regulation of transcription, DNA-templated);GO:0009908(flower development);GO:0010073(meristem maintenance);GO:0010093(specification of floral organ identity);GO:0019953(sexual reproduction);GO:0030154(cell differentiation);GO:0048316(seed developme…	NA
ath-miR172c	RrubChr11G00261810.1	RrubChr11G00261810	RNA-binding protein BRN1 isoform X1 [Sesamum indicum]	GO:0003723(RNA binding);GO:0003729(mRNA binding);GO:0005737(cytoplasm);GO:0006402(mRNA catabolic process);GO:0009626(plant-type hypersensitive response);GO:0009908(flower development);GO:0080151(positive regulation of salicylic acid mediated signaling pathway);GO:2000028(regulation of photoperiodism, flowering)	NA
ath-miR172c	RrubChr2G00048430.1	RrubChr2G00048430	hypothetical protein CDL12_22382 [Handroanthus impetiginosus]	GO:0003677(DNA binding);GO:0003700(DNA binding transcription factor activity);GO:0005634(nucleus);GO:0006351(transcription, DNA-templated);GO:0006355(regulation of transcription, DNA-templated);GO:0009908(flower development);GO:0010073(meristem maintenance);GO:0010093(specification of floral organ identity);GO:0019953(sexual reproduction);GO:0030154(cell differentiation);GO:0048316(seed developme…	NA
ath-miR172c_R-1	RrubChr12G00287780.1	RrubChr12G00287780	AAA+-type ATPase [Handroanthus impetiginosus]	GO:0002237(response to molecule of bacterial origin);GO:0005524(ATP binding);GO:0005739(mitochondrion);GO:0005740(mitochondrial envelope);GO:0005741(mitochondrial outer membrane);GO:0005886(plasma membrane);GO:0008219(cell death);GO:0009411(response to UV);GO:0009617(response to bacterium);GO:0009626(plant-type hypersensitive response);GO:0009863(salicylic acid mediated signaling pathway);GO:0016…	NA
ath-miR172c_R-1	RrubChr12G00293060.1	RrubChr12G00293060	CONSTANS-like protein 9 [Tectona grandis]	GO:0003700(DNA binding transcription factor activity);GO:0005515(protein binding);GO:0005634(nucleus);GO:0006355(regulation of transcription, DNA-templated);GO:0007623(circadian rhythm);GO:0008270(zinc ion binding);GO:0048579(negative regulation of long-day photoperiodism, flowering)	ko04712(Circadian rhythm - plant)
ath-miR172c_R-1	RrubChr1G00013440.1	RrubChr1G00013440	hypothetical protein CDL12_17238 [Handroanthus impetiginosus]	GO:0003677(DNA binding);GO:0003700(DNA binding transcription factor activity);GO:0005634(nucleus);GO:0006351(transcription, DNA-templated);GO:0006355(regulation of transcription, DNA-templated);GO:0009873(ethylene-activated signaling pathway);GO:0045893(positive regulation of transcription, DNA-templated);GO:0048510(regulation of timing of transition from vegetative to reproductive phase)	ko03040(Spliceosome)
ath-miR172c_R-1	RrubChr2G00032200.1	RrubChr2G00032200	F-box/FBD/LRR-repeat protein At1g13570 isoform X3 [Sesamum indicum]	GO:0003674(molecular_function);GO:0005575(cellular_component);GO:0008150(biological_process)	NA
ath-miR172c_R-1	RrubChr2G00044970.1	RrubChr2G00044970	hypothetical protein CDL12_12492 [Handroanthus impetiginosus]	GO:0003674(molecular_function);GO:0005634(nucleus);GO:0008150(biological_process)	NA
ath-miR172c_R-1	RrubChr2G00047360.1	RrubChr2G00047360	peroxiredoxin-2E-1, chloroplastic [Sesamum indicum]	GO:0004601(peroxidase activity);GO:0009505(plant-type cell wall);GO:0009507(chloroplast);GO:0009536(plastid);GO:0009570(chloroplast stroma);GO:0009579(thylakoid);GO:0009941(chloroplast envelope);GO:0016209(antioxidant activity);GO:0042742(defense response to bacterium);GO:0045454(cell redox homeostasis);GO:0051920(peroxiredoxin activity);GO:0055114(oxidation-reduction process)	NA
ath-miR172c_R-1	RrubChr3G00058380.1	RrubChr3G00058380	AP10/EREBP Transcription Factors [Salvia miltiorrhiza]	GO:0010227(floral organ abscission);GO:0048316(seed development);GO:0048461(flower structural organization);GO:0080187(floral organ senescence)	NA
ath-miR172c_R-1	RrubChr3G00062600.1	RrubChr3G00062600	hypothetical protein CDL12_22001 [Handroanthus impetiginosus]	NA	NA
ath-miR172c_R-1	RrubChr3G00070220.1	RrubChr3G00070220	delta-1-pyrroline-5-carboxylate synthase-like isoform X1 [Sesamum indicum]	GO:0004350(glutamate-5-semialdehyde dehydrogenase activity);GO:0005737(cytoplasm);GO:0006561(proline biosynthetic process)	ko00330(Arginine and proline metabolism)
ath-miR172c_R-1	RrubChr3G00071150.1	RrubChr3G00071150	probable serine/threonine-protein kinase At1g54610 [Sesamum indicum]	GO:0004672(protein kinase activity);GO:0004674(protein serine/threonine kinase activity);GO:0005886(plasma membrane);GO:0006468(protein phosphorylation);GO:0046777(protein autophosphorylation)	NA
ath-miR172c_R-1	RrubChr4G00095940.1	RrubChr4G00095940	VQ motif-containing protein 9-like isoform X2 [Sesamum indicum]	GO:0005515(protein binding);GO:0005634(nucleus);GO:0006883(cellular sodium ion homeostasis);GO:0030007(cellular potassium ion homeostasis);GO:0043433(negative regulation of DNA binding transcription factor activity);GO:1901001(negative regulation of response to salt stress)	NA
ath-miR172c_R-1	RrubChr4G00100940.1	RrubChr4G00100940	hypothetical protein CDL12_22502 [Handroanthus impetiginosus]	GO:0005774(vacuolar membrane);GO:0005829(cytosol);GO:0043550(regulation of lipid kinase activity);GO:0070772(PAS complex)	NA
ath-miR172c_R-1	RrubChr5G00128760.1	RrubChr5G00128760	probable galactinol--sucrose galactosyltransferase 6 [Sesamum indicum]	GO:0003824(catalytic activity);GO:0004553(hydrolase activity, hydrolyzing O-glycosyl compounds);GO:0005737(cytoplasm);GO:0006979(response to oxidative stress);GO:0009506(plasmodesma);GO:0034484(raffinose catabolic process);GO:0047274(galactinol-sucrose galactosyltransferase activity);GO:0052692(raffinose alpha-galactosidase activity);GO:0080167(response to karrikin)	ko00052(Galactose metabolism)
ath-miR172c_R-1	RrubChr6G00146770.1	RrubChr6G00146770	pleiotropic drug resistance protein 1 [Sesamum indicum]	GO:0005886(plasma membrane);GO:0016021(integral component of membrane);GO:0042626(ATPase activity, coupled to transmembrane movement of substances)	ko02010(ABC transporters)
ath-miR172c_R-1	RrubChr7G00168910.1	RrubChr7G00168910	xyloglucan 6-xylosyltransferase 2 [Sesamum indicum]	GO:0000139(Golgi membrane);GO:0000271(polysaccharide biosynthetic process);GO:0005515(protein binding);GO:0005768(endosome);GO:0005794(Golgi apparatus);GO:0005802(trans-Golgi network);GO:0006486(protein glycosylation);GO:0009969(xyloglucan biosynthetic process);GO:0010411(xyloglucan metabolic process);GO:0016021(integral component of membrane);GO:0016740(transferase activity);GO:0016757(transfera…	NA
ath-miR172c_R-1	RrubChr7G00176740.1	RrubChr7G00176740	anthocyanidin 3-O-glucoside 6''-O-acyltransferase-like isoform X1 [Olea europaea var. sylvestris]	GO:0033810(anthocyanin 5-O-glucoside 6'''-O-malonyltransferase activity)	ko00942(Anthocyanin biosynthesis)
ath-miR172c_R-1	RrubChr7G00178760.1	RrubChr7G00178760	F-box protein FBW2 [Sesamum indicum]	GO:0004842(ubiquitin-protein transferase activity);GO:0005515(protein binding);GO:0005634(nucleus);GO:0006511(ubiquitin-dependent protein catabolic process);GO:0009737(response to abscisic acid);GO:0010608(posttranscriptional regulation of gene expression);GO:0010629(negative regulation of gene expression);GO:0016567(protein ubiquitination)	NA
ath-miR172c_R-1	RrubChr7G00183080.1	RrubChr7G00183080	PREDICTED: transcription factor APETALA2 isoform X1 [Vitis vinifera]	GO:0003677(DNA binding);GO:0003700(DNA binding transcription factor activity);GO:0005634(nucleus);GO:0006351(transcription, DNA-templated);GO:0006355(regulation of transcription, DNA-templated);GO:0009908(flower development);GO:0010073(meristem maintenance);GO:0010093(specification of floral organ identity);GO:0019953(sexual reproduction);GO:0030154(cell differentiation);GO:0048316(seed developme…	NA
ath-miR172c_R-1	RrubChr7G00188630.1	RrubChr7G00188630	hypothetical protein CDL12_23963 [Handroanthus impetiginosus]	GO:0008150(biological_process);GO:0016757(transferase activity, transferring glycosyl groups)	ko03013(RNA transport)
ath-miR172c_R-1	RrubChr8G00207840.1	RrubChr8G00207840	ribosomal protein S14 (mitochondrion) [Heuchera parviflora var. saurensis]	GO:0003735(structural constituent of ribosome);GO:0006412(translation);GO:0015935(small ribosomal subunit)	ko03010(Ribosome)
ath-miR172c_R-1	RrubChr8G00210690.1	RrubChr8G00210690	uncharacterized protein LOC105165423 [Sesamum indicum]	GO:0003674(molecular_function);GO:0005634(nucleus);GO:0008150(biological_process)	NA
ath-miR172c_R-1	RrubChr9G00216710.1	RrubChr9G00216710	ethylene-responsive transcription factor RAP2-7 isoform X1 [Sesamum indicum]	GO:0003677(DNA binding);GO:0003700(DNA binding transcription factor activity);GO:0005634(nucleus);GO:0006351(transcription, DNA-templated);GO:0006355(regulation of transcription, DNA-templated);GO:0009908(flower development);GO:0010073(meristem maintenance);GO:0010093(specification of floral organ identity);GO:0019953(sexual reproduction);GO:0030154(cell differentiation);GO:0048316(seed developme…	NA
ath-miR172c_R-1	RrubChr11G00261810.1	RrubChr11G00261810	RNA-binding protein BRN1 isoform X1 [Sesamum indicum]	GO:0003723(RNA binding);GO:0003729(mRNA binding);GO:0005737(cytoplasm);GO:0006402(mRNA catabolic process);GO:0009626(plant-type hypersensitive response);GO:0009908(flower development);GO:0080151(positive regulation of salicylic acid mediated signaling pathway);GO:2000028(regulation of photoperiodism, flowering)	NA
ath-miR172c_R-1	RrubChr1G00001580.1	RrubChr1G00001580	CBL-interacting protein kinase 23 [Sesamum indicum]	GO:0004674(protein serine/threonine kinase activity);GO:0005634(nucleus);GO:0005737(cytoplasm);GO:0006468(protein phosphorylation);GO:0035556(intracellular signal transduction)	NA
ath-miR172c_R-1	RrubChr2G00048430.1	RrubChr2G00048430	hypothetical protein CDL12_22382 [Handroanthus impetiginosus]	GO:0003677(DNA binding);GO:0003700(DNA binding transcription factor activity);GO:0005634(nucleus);GO:0006351(transcription, DNA-templated);GO:0006355(regulation of transcription, DNA-templated);GO:0009908(flower development);GO:0010073(meristem maintenance);GO:0010093(specification of floral organ identity);GO:0019953(sexual reproduction);GO:0030154(cell differentiation);GO:0048316(seed developme…	NA
ath-miR2111a-5p_R-1	RrubChr1G00020010.1	RrubChr1G00020010	Transcription factor HEX [Handroanthus impetiginosus]	GO:0003677(DNA binding);GO:0003700(DNA binding transcription factor activity);GO:0005634(nucleus);GO:0006351(transcription, DNA-templated);GO:0006355(regulation of transcription, DNA-templated);GO:0043565(sequence-specific DNA binding)	NA
ath-miR2111a-5p_R-1	RrubChr3G00067880.1	RrubChr3G00067880	3-ketoacyl-CoA thiolase 2, peroxisomal [Sesamum indicum]	GO:0003988(acetyl-CoA C-acyltransferase activity);GO:0005730(nucleolus);GO:0005739(mitochondrion);GO:0005774(vacuolar membrane);GO:0005777(peroxisome);GO:0005829(cytosol);GO:0006635(fatty acid beta-oxidation);GO:0009507(chloroplast);GO:0009514(glyoxysome);GO:0009611(response to wounding);GO:0009695(jasmonic acid biosynthetic process);GO:0009789(positive regulation of abscisic acid-activated signa…	ko00071(Fatty acid degradation);ko00592(alpha-Linolenic acid metabolism);ko01040(Biosynthesis of unsaturated fatty acids);ko00280(Valine, leucine and isoleucine degradation);ko04146(Peroxisome)
ath-miR2111a-5p_R-1	RrubChr5G00127080.1	RrubChr5G00127080	1-deoxy-D-xylulose-5-phosphate synthase [Isodon rubescens]	GO:0005515(protein binding);GO:0008661(1-deoxy-D-xylulose-5-phosphate synthase activity);GO:0009228(thiamine biosynthetic process);GO:0009507(chloroplast);GO:0009570(chloroplast stroma);GO:0015995(chlorophyll biosynthetic process);GO:0016114(terpenoid biosynthetic process);GO:0019288(isopentenyl diphosphate biosynthetic process, methylerythritol 4-phosphate pathway);GO:0046872(metal ion binding);…	ko00730(Thiamine metabolism);ko00900(Terpenoid backbone biosynthesis)
ath-miR2111a-5p_R-1	RrubChr5G00127760.1	RrubChr5G00127760	hypothetical protein CDL12_09700 [Handroanthus impetiginosus]	GO:0005515(protein binding);GO:0005634(nucleus);GO:0005737(cytoplasm);GO:0016567(protein ubiquitination);GO:0019005(SCF ubiquitin ligase complex)	NA
ath-miR2111a-5p_R-1	RrubChr5G00129110.1	RrubChr5G00129110	hypothetical protein CDL12_12156 [Handroanthus impetiginosus]	GO:0003677(DNA binding);GO:0003700(DNA binding transcription factor activity);GO:0005515(protein binding);GO:0005634(nucleus);GO:0006351(transcription, DNA-templated);GO:0006355(regulation of transcription, DNA-templated);GO:0009723(response to ethylene);GO:0009733(response to auxin);GO:0009734(auxin-activated signaling pathway);GO:0010311(lateral root formation);GO:0043565(sequence-specific DNA …	ko04075(Plant hormone signal transduction)
ath-miR2111a-5p_R-1	RrubChr6G00137320.1	RrubChr6G00137320	Ras-related protein RABD2c [Glycine soja]	GO:0000139(Golgi membrane);GO:0005789(endoplasmic reticulum membrane);GO:0006888(ER to Golgi vesicle-mediated transport)	NA
ath-miR2111a-5p_R-1	RrubChr6G00157790.1	RrubChr6G00157790	cleavage and polyadenylation specificity factor subunit 6 [Sesamum indicum]	GO:0003723(RNA binding);GO:0005634(nucleus)	ko03015(mRNA surveillance pathway)
ath-miR2111a-5p_R-1	RrubChr7G00172710.1	RrubChr7G00172710	cytochrome P450 CYP76AH16 [Plectranthus barbatus]	GO:0016020(membrane);GO:0016709(oxidoreductase activity, acting on paired donors, with incorporation or reduction of molecular oxygen, NAD(P)H as one donor, and incorporation of one atom of oxygen);GO:0044550(secondary metabolite biosynthetic process)	NA
ath-miR2111a-5p_R-1	RrubChr7G00182560.1	RrubChr7G00182560	ribonuclease III domain-containing protein RNC1, chloroplastic [Sesamum indicum]	GO:0003725(double-stranded RNA binding);GO:0004525(ribonuclease III activity);GO:0005634(nucleus);GO:0030422(production of siRNA involved in RNA interference);GO:0031053(primary miRNA processing);GO:0031054(pre-miRNA processing);GO:0090502(RNA phosphodiester bond hydrolysis, endonucleolytic)	NA
ath-miR2111a-5p_R-1	RrubChr7G00184300.1	RrubChr7G00184300	probable RNA helicase SDE3 [Sesamum indicum]	GO:0003724(RNA helicase activity);GO:0005515(protein binding);GO:0005524(ATP binding);GO:0005737(cytoplasm);GO:0009616(virus induced gene silencing);GO:0016787(hydrolase activity);GO:0035194(posttranscriptional gene silencing by RNA)	NA
ath-miR2111a-5p_R-1	RrubChr7G00189180.1	RrubChr7G00189180	probable inactive leucine-rich repeat receptor-like protein kinase At3g03770 [Sesamum indicum]	GO:0004672(protein kinase activity);GO:0004674(protein serine/threonine kinase activity);GO:0005524(ATP binding);GO:0005886(plasma membrane);GO:0006468(protein phosphorylation);GO:0007169(transmembrane receptor protein tyrosine kinase signaling pathway);GO:0016021(integral component of membrane)	ko04626(Plant-pathogen interaction)
ath-miR2111a-5p_R-1	RrubChr8G00202310.1	RrubChr8G00202310	Molecular chaperone of the GrpE family [Handroanthus impetiginosus]	GO:0000774(adenyl-nucleotide exchange factor activity);GO:0001405(presequence translocase-associated import motor);GO:0005507(copper ion binding);GO:0005524(ATP binding);GO:0005739(mitochondrion);GO:0005759(mitochondrial matrix);GO:0006457(protein folding);GO:0009411(response to UV);GO:0009507(chloroplast);GO:0030150(protein import into mitochondrial matrix);GO:0042803(protein homodimerization ac…	NA
ath-miR2111a-5p_R-1	RrubChr12G00303050.1	RrubChr12G00303050	hypothetical protein MIMGU_mgv1a005820mg [Erythranthe guttata]	GO:0003872(6-phosphofructokinase activity);GO:0005524(ATP binding);GO:0005737(cytoplasm);GO:0005829(cytosol);GO:0005945(6-phosphofructokinase complex);GO:0006002(fructose 6-phosphate metabolic process);GO:0006096(glycolytic process);GO:0010053(root epidermal cell differentiation);GO:0046872(metal ion binding)	ko00010(Glycolysis / Gluconeogenesis);ko00030(Pentose phosphate pathway);ko00051(Fructose and mannose metabolism);ko00052(Galactose metabolism);ko03018(RNA degradation)
ath-miR2111a-5p_R-1	RrubChr2G00029320.1	RrubChr2G00029320	probable serine/threonine-protein kinase PBL11 [Sesamum indicum]	GO:0004675(transmembrane receptor protein serine/threonine kinase activity);GO:0005524(ATP binding);GO:0005886(plasma membrane);GO:0006468(protein phosphorylation);GO:0007166(cell surface receptor signaling pathway);GO:0016301(kinase activity);GO:0016310(phosphorylation)	NA
ath-miR2111a-5p_R-1	RrubChr4G00110960.1	RrubChr4G00110960	histidine kinase 3 isoform X1 [Sesamum indicum]	GO:0000155(phosphorelay sensor kinase activity);GO:0000160(phosphorelay signal transduction system);GO:0004673(protein histidine kinase activity);GO:0004721(phosphoprotein phosphatase activity);GO:0005034(osmosensor activity);GO:0005515(protein binding);GO:0005789(endoplasmic reticulum membrane);GO:0005886(plasma membrane);GO:0006970(response to osmotic stress);GO:0009116(nucleoside metabolic pro…	ko04075(Plant hormone signal transduction)
ath-miR2111a-5p_R-1	RrubChr9G00232890.1	RrubChr9G00232890	PREDICTED: 40S ribosomal protein S20-2 [Eucalyptus grandis]	GO:0003735(structural constituent of ribosome);GO:0022627(cytosolic small ribosomal subunit)	ko03010(Ribosome)
ath-MIR2938-p3_1ss19AG	RrubChr3G00070640.1	RrubChr3G00070640	60S acidic ribosomal protein P0 [Handroanthus impetiginosus]	GO:0002181(cytoplasmic translation);GO:0003735(structural constituent of ribosome);GO:0022625(cytosolic large ribosomal subunit);GO:0030687(preribosome, large subunit precursor);GO:0070180(large ribosomal subunit rRNA binding)	ko03010(Ribosome)
ath-MIR2938-p3_1ss19AG	RrubChr4G00096930.1	RrubChr4G00096930	PREDICTED: autophagy-related protein 18b isoform X1 [Erythranthe guttata]	GO:0000045(autophagosome assembly);GO:0000422(autophagy of mitochondrion);GO:0005829(cytosol);GO:0006497(protein lipidation);GO:0019898(extrinsic component of membrane);GO:0032266(phosphatidylinositol-3-phosphate binding);GO:0034045(phagophore assembly site membrane);GO:0034497(protein localization to phagophore assembly site);GO:0044804(autophagy of nucleus);GO:0080025(phosphatidylinositol-3,5-b…	ko04136(Autophagy - other eukaryotes)
ath-MIR2938-p3_1ss19AG	RrubChr4G00097130.1	RrubChr4G00097130	eukaryotic translation initiation factor-like [Sesamum indicum]	GO:0003723(RNA binding);GO:0003729(mRNA binding);GO:0003743(translation initiation factor activity);GO:0005634(nucleus);GO:0005737(cytoplasm);GO:0005829(cytosol);GO:0006412(translation);GO:0006413(translational initiation);GO:0006417(regulation of translation)	ko03013(RNA transport)
ath-MIR2938-p5_1ss19AG	RrubChr3G00070640.1	RrubChr3G00070640	60S acidic ribosomal protein P0 [Handroanthus impetiginosus]	GO:0002181(cytoplasmic translation);GO:0003735(structural constituent of ribosome);GO:0022625(cytosolic large ribosomal subunit);GO:0030687(preribosome, large subunit precursor);GO:0070180(large ribosomal subunit rRNA binding)	ko03010(Ribosome)
ath-MIR2938-p5_1ss19AG	RrubChr4G00096930.1	RrubChr4G00096930	PREDICTED: autophagy-related protein 18b isoform X1 [Erythranthe guttata]	GO:0000045(autophagosome assembly);GO:0000422(autophagy of mitochondrion);GO:0005829(cytosol);GO:0006497(protein lipidation);GO:0019898(extrinsic component of membrane);GO:0032266(phosphatidylinositol-3-phosphate binding);GO:0034045(phagophore assembly site membrane);GO:0034497(protein localization to phagophore assembly site);GO:0044804(autophagy of nucleus);GO:0080025(phosphatidylinositol-3,5-b…	ko04136(Autophagy - other eukaryotes)
ath-MIR2938-p5_1ss19AG	RrubChr4G00097130.1	RrubChr4G00097130	eukaryotic translation initiation factor-like [Sesamum indicum]	GO:0003723(RNA binding);GO:0003729(mRNA binding);GO:0003743(translation initiation factor activity);GO:0005634(nucleus);GO:0005737(cytoplasm);GO:0005829(cytosol);GO:0006412(translation);GO:0006413(translational initiation);GO:0006417(regulation of translation)	ko03013(RNA transport)
ath-miR319a	RrubChr11G00261230.1	RrubChr11G00261230	translocase of chloroplast 159, chloroplastic, partial [Sesamum indicum]	GO:0003924(GTPase activity);GO:0004888(transmembrane signaling receptor activity);GO:0004930(G-protein coupled receptor activity);GO:0005515(protein binding);GO:0005525(GTP binding);GO:0005829(cytosol);GO:0009507(chloroplast);GO:0009536(plastid);GO:0009707(chloroplast outer membrane);GO:0009941(chloroplast envelope);GO:0016020(membrane);GO:0016021(integral component of membrane);GO:0045036(protei…	ko00020(Citrate cycle (TCA cycle));ko00480(Glutathione metabolism);ko04146(Peroxisome)
ath-miR319a	RrubChr11G00266180.1	RrubChr11G00266180	MYB transcription factor 4 [Tectona grandis]	GO:0000981(RNA polymerase II transcription factor activity, sequence-specific DNA binding);GO:0001135(transcription factor activity, RNA polymerase II transcription factor recruiting);GO:0003677(DNA binding);GO:0003700(DNA binding transcription factor activity);GO:0005634(nucleus);GO:0006351(transcription, DNA-templated);GO:0006355(regulation of transcription, DNA-templated);GO:0006357(regulation…	NA
ath-miR319a	RrubChr11G00268130.1	RrubChr11G00268130	MYB-related transcription factor [Salvia miltiorrhiza]	GO:0000981(RNA polymerase II transcription factor activity, sequence-specific DNA binding);GO:0001135(transcription factor activity, RNA polymerase II transcription factor recruiting);GO:0003677(DNA binding);GO:0003700(DNA binding transcription factor activity);GO:0005634(nucleus);GO:0006351(transcription, DNA-templated);GO:0006355(regulation of transcription, DNA-templated);GO:0006357(regulation…	NA
ath-miR319a	RrubChr1G00001500.1	RrubChr1G00001500	transcription factor TCP2-like [Sesamum indicum]	GO:0003677(DNA binding);GO:0003700(DNA binding transcription factor activity);GO:0005515(protein binding);GO:0005634(nucleus);GO:0006351(transcription, DNA-templated);GO:0006355(regulation of transcription, DNA-templated);GO:0009637(response to blue light);GO:0009965(leaf morphogenesis);GO:0030154(cell differentiation);GO:0045962(positive regulation of development, heterochronic);GO:0048366(leaf …	NA
ath-miR319a	RrubChr3G00063760.1	RrubChr3G00063760	transcription factor TCP4-like [Sesamum indicum]	GO:0003677(DNA binding);GO:0003700(DNA binding transcription factor activity);GO:0005515(protein binding);GO:0005634(nucleus);GO:0006351(transcription, DNA-templated);GO:0006355(regulation of transcription, DNA-templated);GO:0009793(embryo development ending in seed dormancy);GO:0009965(leaf morphogenesis);GO:0010150(leaf senescence);GO:0030154(cell differentiation);GO:0045962(positive regulation…	NA
ath-miR319a	RrubChr5G00116390.1	RrubChr5G00116390	60S ribosomal protein L7-4 isoform X1 [Sesamum indicum]	GO:0000463(maturation of LSU-rRNA from tricistronic rRNA transcript (SSU-rRNA, 5.8S rRNA, LSU-rRNA));GO:0002181(cytoplasmic translation);GO:0003735(structural constituent of ribosome);GO:0022625(cytosolic large ribosomal subunit)	ko03010(Ribosome)
ath-miR319a	RrubChr5G00116430.1	RrubChr5G00116430	UDP-glucose:glycoprotein glucosyltransferase [Handroanthus impetiginosus]	GO:0003980(UDP-glucose:glycoprotein glucosyltransferase activity);GO:0005783(endoplasmic reticulum);GO:0006486(protein glycosylation);GO:0018279(protein N-linked glycosylation via asparagine);GO:0030968(endoplasmic reticulum unfolded protein response);GO:0051082(unfolded protein binding);GO:0051084('de novo' posttranslational protein folding);GO:0071712(ER-associated misfolded protein catabolic p…	ko04141(Protein processing in endoplasmic reticulum)
ath-miR319a	RrubChr8G00200150.1	RrubChr8G00200150	transcription factor TCP4-like [Sesamum indicum]	GO:0003677(DNA binding);GO:0003700(DNA binding transcription factor activity);GO:0005515(protein binding);GO:0005634(nucleus);GO:0006351(transcription, DNA-templated);GO:0006355(regulation of transcription, DNA-templated);GO:0009793(embryo development ending in seed dormancy);GO:0009965(leaf morphogenesis);GO:0010150(leaf senescence);GO:0030154(cell differentiation);GO:0045962(positive regulation…	NA
ath-miR319a_1ss21TA	RrubChr11G00261230.1	RrubChr11G00261230	translocase of chloroplast 159, chloroplastic, partial [Sesamum indicum]	GO:0003924(GTPase activity);GO:0004888(transmembrane signaling receptor activity);GO:0004930(G-protein coupled receptor activity);GO:0005515(protein binding);GO:0005525(GTP binding);GO:0005829(cytosol);GO:0009507(chloroplast);GO:0009536(plastid);GO:0009707(chloroplast outer membrane);GO:0009941(chloroplast envelope);GO:0016020(membrane);GO:0016021(integral component of membrane);GO:0045036(protei…	ko00020(Citrate cycle (TCA cycle));ko00480(Glutathione metabolism);ko04146(Peroxisome)
ath-miR319a_1ss21TA	RrubChr11G00266180.1	RrubChr11G00266180	MYB transcription factor 4 [Tectona grandis]	GO:0000981(RNA polymerase II transcription factor activity, sequence-specific DNA binding);GO:0001135(transcription factor activity, RNA polymerase II transcription factor recruiting);GO:0003677(DNA binding);GO:0003700(DNA binding transcription factor activity);GO:0005634(nucleus);GO:0006351(transcription, DNA-templated);GO:0006355(regulation of transcription, DNA-templated);GO:0006357(regulation…	NA
ath-miR319a_1ss21TA	RrubChr11G00268130.1	RrubChr11G00268130	MYB-related transcription factor [Salvia miltiorrhiza]	GO:0000981(RNA polymerase II transcription factor activity, sequence-specific DNA binding);GO:0001135(transcription factor activity, RNA polymerase II transcription factor recruiting);GO:0003677(DNA binding);GO:0003700(DNA binding transcription factor activity);GO:0005634(nucleus);GO:0006351(transcription, DNA-templated);GO:0006355(regulation of transcription, DNA-templated);GO:0006357(regulation…	NA
ath-miR319a_1ss21TA	RrubChr11G00270800.1	RrubChr11G00270800	PREDICTED: HUA2-like protein 2 [Erythranthe guttata]	GO:0004602(glutathione peroxidase activity);GO:0005739(mitochondrion);GO:0005829(cytosol);GO:0006979(response to oxidative stress);GO:0012505(endomembrane system);GO:0055114(oxidation-reduction process)	ko00590(Arachidonic acid metabolism);ko00480(Glutathione metabolism)
ath-miR319a_1ss21TA	RrubChr1G00001500.1	RrubChr1G00001500	transcription factor TCP2-like [Sesamum indicum]	GO:0003677(DNA binding);GO:0003700(DNA binding transcription factor activity);GO:0005515(protein binding);GO:0005634(nucleus);GO:0006351(transcription, DNA-templated);GO:0006355(regulation of transcription, DNA-templated);GO:0009637(response to blue light);GO:0009965(leaf morphogenesis);GO:0030154(cell differentiation);GO:0045962(positive regulation of development, heterochronic);GO:0048366(leaf …	NA
ath-miR319a_1ss21TA	RrubChr3G00063760.1	RrubChr3G00063760	transcription factor TCP4-like [Sesamum indicum]	GO:0003677(DNA binding);GO:0003700(DNA binding transcription factor activity);GO:0005515(protein binding);GO:0005634(nucleus);GO:0006351(transcription, DNA-templated);GO:0006355(regulation of transcription, DNA-templated);GO:0009793(embryo development ending in seed dormancy);GO:0009965(leaf morphogenesis);GO:0010150(leaf senescence);GO:0030154(cell differentiation);GO:0045962(positive regulation…	NA
ath-miR319a_1ss21TA	RrubChr8G00200150.1	RrubChr8G00200150	transcription factor TCP4-like [Sesamum indicum]	GO:0003677(DNA binding);GO:0003700(DNA binding transcription factor activity);GO:0005515(protein binding);GO:0005634(nucleus);GO:0006351(transcription, DNA-templated);GO:0006355(regulation of transcription, DNA-templated);GO:0009793(embryo development ending in seed dormancy);GO:0009965(leaf morphogenesis);GO:0010150(leaf senescence);GO:0030154(cell differentiation);GO:0045962(positive regulation…	NA
ath-miR319a_2ss20CT21TC	RrubChr11G00261230.1	RrubChr11G00261230	translocase of chloroplast 159, chloroplastic, partial [Sesamum indicum]	GO:0003924(GTPase activity);GO:0004888(transmembrane signaling receptor activity);GO:0004930(G-protein coupled receptor activity);GO:0005515(protein binding);GO:0005525(GTP binding);GO:0005829(cytosol);GO:0009507(chloroplast);GO:0009536(plastid);GO:0009707(chloroplast outer membrane);GO:0009941(chloroplast envelope);GO:0016020(membrane);GO:0016021(integral component of membrane);GO:0045036(protei…	ko00020(Citrate cycle (TCA cycle));ko00480(Glutathione metabolism);ko04146(Peroxisome)
ath-miR319a_2ss20CT21TC	RrubChr11G00266180.1	RrubChr11G00266180	MYB transcription factor 4 [Tectona grandis]	GO:0000981(RNA polymerase II transcription factor activity, sequence-specific DNA binding);GO:0001135(transcription factor activity, RNA polymerase II transcription factor recruiting);GO:0003677(DNA binding);GO:0003700(DNA binding transcription factor activity);GO:0005634(nucleus);GO:0006351(transcription, DNA-templated);GO:0006355(regulation of transcription, DNA-templated);GO:0006357(regulation…	NA
ath-miR319a_2ss20CT21TC	RrubChr11G00268130.1	RrubChr11G00268130	MYB-related transcription factor [Salvia miltiorrhiza]	GO:0000981(RNA polymerase II transcription factor activity, sequence-specific DNA binding);GO:0001135(transcription factor activity, RNA polymerase II transcription factor recruiting);GO:0003677(DNA binding);GO:0003700(DNA binding transcription factor activity);GO:0005634(nucleus);GO:0006351(transcription, DNA-templated);GO:0006355(regulation of transcription, DNA-templated);GO:0006357(regulation…	NA
ath-miR319a_2ss20CT21TC	RrubChr12G00287490.1	RrubChr12G00287490	protein IQ-DOMAIN 1 [Sesamum indicum]	GO:0005516(calmodulin binding);GO:0005634(nucleus);GO:0005886(plasma membrane);GO:0008150(biological_process)	ko03015(mRNA surveillance pathway)
ath-miR319a_2ss20CT21TC	RrubChr1G00001500.1	RrubChr1G00001500	transcription factor TCP2-like [Sesamum indicum]	GO:0003677(DNA binding);GO:0003700(DNA binding transcription factor activity);GO:0005515(protein binding);GO:0005634(nucleus);GO:0006351(transcription, DNA-templated);GO:0006355(regulation of transcription, DNA-templated);GO:0009637(response to blue light);GO:0009965(leaf morphogenesis);GO:0030154(cell differentiation);GO:0045962(positive regulation of development, heterochronic);GO:0048366(leaf …	NA
ath-miR319a_2ss20CT21TC	RrubChr2G00054650.1	RrubChr2G00054650	transcription initiation factor TFIID subunit 15 isoform X1 [Olea europaea var. sylvestris]	GO:0003723(RNA binding);GO:0005634(nucleus);GO:0006351(transcription, DNA-templated);GO:0006355(regulation of transcription, DNA-templated);GO:0016874(ligase activity);GO:0046872(metal ion binding)	ko03022(Basal transcription factors)
ath-miR319a_2ss20CT21TC	RrubChr3G00063760.1	RrubChr3G00063760	transcription factor TCP4-like [Sesamum indicum]	GO:0003677(DNA binding);GO:0003700(DNA binding transcription factor activity);GO:0005515(protein binding);GO:0005634(nucleus);GO:0006351(transcription, DNA-templated);GO:0006355(regulation of transcription, DNA-templated);GO:0009793(embryo development ending in seed dormancy);GO:0009965(leaf morphogenesis);GO:0010150(leaf senescence);GO:0030154(cell differentiation);GO:0045962(positive regulation…	NA
ath-miR319a_2ss20CT21TC	RrubChr6G00159630.1	RrubChr6G00159630	Nucleoside diphosphate kinase [Handroanthus impetiginosus]	GO:0004550(nucleoside diphosphate kinase activity);GO:0005622(intracellular);GO:0006163(purine nucleotide metabolic process);GO:0006220(pyrimidine nucleotide metabolic process);GO:0009142(nucleoside triphosphate biosynthetic process)	ko00230(Purine metabolism);ko00240(Pyrimidine metabolism);ko04016(MAPK signaling pathway - plant)
ath-miR319a_2ss20CT21TC	RrubChr7G00178230.1	RrubChr7G00178230	Armadillo repeat protein [Handroanthus impetiginosus]	GO:0005634(nucleus);GO:0005737(cytoplasm)	NA
ath-miR319a_2ss20CT21TC	RrubChr8G00200150.1	RrubChr8G00200150	transcription factor TCP4-like [Sesamum indicum]	GO:0003677(DNA binding);GO:0003700(DNA binding transcription factor activity);GO:0005515(protein binding);GO:0005634(nucleus);GO:0006351(transcription, DNA-templated);GO:0006355(regulation of transcription, DNA-templated);GO:0009793(embryo development ending in seed dormancy);GO:0009965(leaf morphogenesis);GO:0010150(leaf senescence);GO:0030154(cell differentiation);GO:0045962(positive regulation…	NA
ath-miR319a_R-1	RrubChr11G00261230.1	RrubChr11G00261230	translocase of chloroplast 159, chloroplastic, partial [Sesamum indicum]	GO:0003924(GTPase activity);GO:0004888(transmembrane signaling receptor activity);GO:0004930(G-protein coupled receptor activity);GO:0005515(protein binding);GO:0005525(GTP binding);GO:0005829(cytosol);GO:0009507(chloroplast);GO:0009536(plastid);GO:0009707(chloroplast outer membrane);GO:0009941(chloroplast envelope);GO:0016020(membrane);GO:0016021(integral component of membrane);GO:0045036(protei…	ko00020(Citrate cycle (TCA cycle));ko00480(Glutathione metabolism);ko04146(Peroxisome)
ath-miR319a_R-1	RrubChr11G00266180.1	RrubChr11G00266180	MYB transcription factor 4 [Tectona grandis]	GO:0000981(RNA polymerase II transcription factor activity, sequence-specific DNA binding);GO:0001135(transcription factor activity, RNA polymerase II transcription factor recruiting);GO:0003677(DNA binding);GO:0003700(DNA binding transcription factor activity);GO:0005634(nucleus);GO:0006351(transcription, DNA-templated);GO:0006355(regulation of transcription, DNA-templated);GO:0006357(regulation…	NA
ath-miR319a_R-1	RrubChr11G00268130.1	RrubChr11G00268130	MYB-related transcription factor [Salvia miltiorrhiza]	GO:0000981(RNA polymerase II transcription factor activity, sequence-specific DNA binding);GO:0001135(transcription factor activity, RNA polymerase II transcription factor recruiting);GO:0003677(DNA binding);GO:0003700(DNA binding transcription factor activity);GO:0005634(nucleus);GO:0006351(transcription, DNA-templated);GO:0006355(regulation of transcription, DNA-templated);GO:0006357(regulation…	NA
ath-miR319a_R-1	RrubChr11G00270800.1	RrubChr11G00270800	PREDICTED: HUA2-like protein 2 [Erythranthe guttata]	GO:0004602(glutathione peroxidase activity);GO:0005739(mitochondrion);GO:0005829(cytosol);GO:0006979(response to oxidative stress);GO:0012505(endomembrane system);GO:0055114(oxidation-reduction process)	ko00590(Arachidonic acid metabolism);ko00480(Glutathione metabolism)
ath-miR319a_R-1	RrubChr1G00001500.1	RrubChr1G00001500	transcription factor TCP2-like [Sesamum indicum]	GO:0003677(DNA binding);GO:0003700(DNA binding transcription factor activity);GO:0005515(protein binding);GO:0005634(nucleus);GO:0006351(transcription, DNA-templated);GO:0006355(regulation of transcription, DNA-templated);GO:0009637(response to blue light);GO:0009965(leaf morphogenesis);GO:0030154(cell differentiation);GO:0045962(positive regulation of development, heterochronic);GO:0048366(leaf …	NA
ath-miR319a_R-1	RrubChr3G00063760.1	RrubChr3G00063760	transcription factor TCP4-like [Sesamum indicum]	GO:0003677(DNA binding);GO:0003700(DNA binding transcription factor activity);GO:0005515(protein binding);GO:0005634(nucleus);GO:0006351(transcription, DNA-templated);GO:0006355(regulation of transcription, DNA-templated);GO:0009793(embryo development ending in seed dormancy);GO:0009965(leaf morphogenesis);GO:0010150(leaf senescence);GO:0030154(cell differentiation);GO:0045962(positive regulation…	NA
ath-miR319a_R-1	RrubChr8G00200150.1	RrubChr8G00200150	transcription factor TCP4-like [Sesamum indicum]	GO:0003677(DNA binding);GO:0003700(DNA binding transcription factor activity);GO:0005515(protein binding);GO:0005634(nucleus);GO:0006351(transcription, DNA-templated);GO:0006355(regulation of transcription, DNA-templated);GO:0009793(embryo development ending in seed dormancy);GO:0009965(leaf morphogenesis);GO:0010150(leaf senescence);GO:0030154(cell differentiation);GO:0045962(positive regulation…	NA
ath-miR319a_R-1_1ss20CT	RrubChr11G00261230.1	RrubChr11G00261230	translocase of chloroplast 159, chloroplastic, partial [Sesamum indicum]	GO:0003924(GTPase activity);GO:0004888(transmembrane signaling receptor activity);GO:0004930(G-protein coupled receptor activity);GO:0005515(protein binding);GO:0005525(GTP binding);GO:0005829(cytosol);GO:0009507(chloroplast);GO:0009536(plastid);GO:0009707(chloroplast outer membrane);GO:0009941(chloroplast envelope);GO:0016020(membrane);GO:0016021(integral component of membrane);GO:0045036(protei…	ko00020(Citrate cycle (TCA cycle));ko00480(Glutathione metabolism);ko04146(Peroxisome)
ath-miR319a_R-1_1ss20CT	RrubChr11G00266180.1	RrubChr11G00266180	MYB transcription factor 4 [Tectona grandis]	GO:0000981(RNA polymerase II transcription factor activity, sequence-specific DNA binding);GO:0001135(transcription factor activity, RNA polymerase II transcription factor recruiting);GO:0003677(DNA binding);GO:0003700(DNA binding transcription factor activity);GO:0005634(nucleus);GO:0006351(transcription, DNA-templated);GO:0006355(regulation of transcription, DNA-templated);GO:0006357(regulation…	NA
ath-miR319a_R-1_1ss20CT	RrubChr11G00268130.1	RrubChr11G00268130	MYB-related transcription factor [Salvia miltiorrhiza]	GO:0000981(RNA polymerase II transcription factor activity, sequence-specific DNA binding);GO:0001135(transcription factor activity, RNA polymerase II transcription factor recruiting);GO:0003677(DNA binding);GO:0003700(DNA binding transcription factor activity);GO:0005634(nucleus);GO:0006351(transcription, DNA-templated);GO:0006355(regulation of transcription, DNA-templated);GO:0006357(regulation…	NA
ath-miR319a_R-1_1ss20CT	RrubChr1G00001500.1	RrubChr1G00001500	transcription factor TCP2-like [Sesamum indicum]	GO:0003677(DNA binding);GO:0003700(DNA binding transcription factor activity);GO:0005515(protein binding);GO:0005634(nucleus);GO:0006351(transcription, DNA-templated);GO:0006355(regulation of transcription, DNA-templated);GO:0009637(response to blue light);GO:0009965(leaf morphogenesis);GO:0030154(cell differentiation);GO:0045962(positive regulation of development, heterochronic);GO:0048366(leaf …	NA
ath-miR319a_R-1_1ss20CT	RrubChr2G00034460.1	RrubChr2G00034460	hypothetical protein MIMGU_mgv1a012339mg [Erythranthe guttata]	GO:0005783(endoplasmic reticulum);GO:0005886(plasma membrane);GO:0009507(chloroplast)	NA
ath-miR319a_R-1_1ss20CT	RrubChr2G00038860.1	RrubChr2G00038860	pentatricopeptide repeat-containing protein At1g80150, mitochondrial [Sesamum indicum]	GO:0003674(molecular_function);GO:0003723(RNA binding);GO:0005739(mitochondrion);GO:0008150(biological_process)	NA
ath-miR319a_R-1_1ss20CT	RrubChr2G00054650.1	RrubChr2G00054650	transcription initiation factor TFIID subunit 15 isoform X1 [Olea europaea var. sylvestris]	GO:0003723(RNA binding);GO:0005634(nucleus);GO:0006351(transcription, DNA-templated);GO:0006355(regulation of transcription, DNA-templated);GO:0016874(ligase activity);GO:0046872(metal ion binding)	ko03022(Basal transcription factors)
ath-miR319a_R-1_1ss20CT	RrubChr3G00063760.1	RrubChr3G00063760	transcription factor TCP4-like [Sesamum indicum]	GO:0003677(DNA binding);GO:0003700(DNA binding transcription factor activity);GO:0005515(protein binding);GO:0005634(nucleus);GO:0006351(transcription, DNA-templated);GO:0006355(regulation of transcription, DNA-templated);GO:0009793(embryo development ending in seed dormancy);GO:0009965(leaf morphogenesis);GO:0010150(leaf senescence);GO:0030154(cell differentiation);GO:0045962(positive regulation…	NA
ath-miR319a_R-1_1ss20CT	RrubChr5G00133970.1	RrubChr5G00133970	transcription factor IIIB 60 kDa subunit [Sesamum indicum]	GO:0000126(transcription factor TFIIIB complex);GO:0005634(nucleus);GO:0006355(regulation of transcription, DNA-templated);GO:0006383(transcription by RNA polymerase III);GO:0017025(TBP-class protein binding);GO:0070897(DNA-templated transcriptional preinitiation complex assembly)	NA
ath-miR319a_R-1_1ss20CT	RrubChr7G00172300.1	RrubChr7G00172300	PREDICTED: uncharacterized protein LOC105973251 [Erythranthe guttata]	GO:0003674(molecular_function);GO:0005768(endosome);GO:0005794(Golgi apparatus);GO:0005802(trans-Golgi network);GO:0008150(biological_process);GO:0009507(chloroplast);GO:0016021(integral component of membrane)	NA
ath-miR319a_R-1_1ss20CT	RrubChr8G00200150.1	RrubChr8G00200150	transcription factor TCP4-like [Sesamum indicum]	GO:0003677(DNA binding);GO:0003700(DNA binding transcription factor activity);GO:0005515(protein binding);GO:0005634(nucleus);GO:0006351(transcription, DNA-templated);GO:0006355(regulation of transcription, DNA-templated);GO:0009793(embryo development ending in seed dormancy);GO:0009965(leaf morphogenesis);GO:0010150(leaf senescence);GO:0030154(cell differentiation);GO:0045962(positive regulation…	NA
ath-miR319a_R-1_1ss20CT	RrubChr6G00162780.1	RrubChr6G00162780	NA	NA	NA
ath-miR319a_R-1_1ss20CT	RrubChr9G00225190.1	RrubChr9G00225190	hypothetical protein CDL12_24677 [Handroanthus impetiginosus]	NA	NA
ath-MIR319b-p5	RrubChr11G00261230.1	RrubChr11G00261230	translocase of chloroplast 159, chloroplastic, partial [Sesamum indicum]	GO:0003924(GTPase activity);GO:0004888(transmembrane signaling receptor activity);GO:0004930(G-protein coupled receptor activity);GO:0005515(protein binding);GO:0005525(GTP binding);GO:0005829(cytosol);GO:0009507(chloroplast);GO:0009536(plastid);GO:0009707(chloroplast outer membrane);GO:0009941(chloroplast envelope);GO:0016020(membrane);GO:0016021(integral component of membrane);GO:0045036(protei…	ko00020(Citrate cycle (TCA cycle));ko00480(Glutathione metabolism);ko04146(Peroxisome)
ath-MIR319b-p5	RrubChr11G00266180.1	RrubChr11G00266180	MYB transcription factor 4 [Tectona grandis]	GO:0000981(RNA polymerase II transcription factor activity, sequence-specific DNA binding);GO:0001135(transcription factor activity, RNA polymerase II transcription factor recruiting);GO:0003677(DNA binding);GO:0003700(DNA binding transcription factor activity);GO:0005634(nucleus);GO:0006351(transcription, DNA-templated);GO:0006355(regulation of transcription, DNA-templated);GO:0006357(regulation…	NA
ath-MIR319b-p5	RrubChr11G00268130.1	RrubChr11G00268130	MYB-related transcription factor [Salvia miltiorrhiza]	GO:0000981(RNA polymerase II transcription factor activity, sequence-specific DNA binding);GO:0001135(transcription factor activity, RNA polymerase II transcription factor recruiting);GO:0003677(DNA binding);GO:0003700(DNA binding transcription factor activity);GO:0005634(nucleus);GO:0006351(transcription, DNA-templated);GO:0006355(regulation of transcription, DNA-templated);GO:0006357(regulation…	NA
ath-MIR319b-p5	RrubChr11G00270800.1	RrubChr11G00270800	PREDICTED: HUA2-like protein 2 [Erythranthe guttata]	GO:0004602(glutathione peroxidase activity);GO:0005739(mitochondrion);GO:0005829(cytosol);GO:0006979(response to oxidative stress);GO:0012505(endomembrane system);GO:0055114(oxidation-reduction process)	ko00590(Arachidonic acid metabolism);ko00480(Glutathione metabolism)
ath-MIR319b-p5	RrubChr1G00001500.1	RrubChr1G00001500	transcription factor TCP2-like [Sesamum indicum]	GO:0003677(DNA binding);GO:0003700(DNA binding transcription factor activity);GO:0005515(protein binding);GO:0005634(nucleus);GO:0006351(transcription, DNA-templated);GO:0006355(regulation of transcription, DNA-templated);GO:0009637(response to blue light);GO:0009965(leaf morphogenesis);GO:0030154(cell differentiation);GO:0045962(positive regulation of development, heterochronic);GO:0048366(leaf …	NA
ath-MIR319b-p5	RrubChr3G00063760.1	RrubChr3G00063760	transcription factor TCP4-like [Sesamum indicum]	GO:0003677(DNA binding);GO:0003700(DNA binding transcription factor activity);GO:0005515(protein binding);GO:0005634(nucleus);GO:0006351(transcription, DNA-templated);GO:0006355(regulation of transcription, DNA-templated);GO:0009793(embryo development ending in seed dormancy);GO:0009965(leaf morphogenesis);GO:0010150(leaf senescence);GO:0030154(cell differentiation);GO:0045962(positive regulation…	NA
ath-MIR319b-p5	RrubChr8G00200150.1	RrubChr8G00200150	transcription factor TCP4-like [Sesamum indicum]	GO:0003677(DNA binding);GO:0003700(DNA binding transcription factor activity);GO:0005515(protein binding);GO:0005634(nucleus);GO:0006351(transcription, DNA-templated);GO:0006355(regulation of transcription, DNA-templated);GO:0009793(embryo development ending in seed dormancy);GO:0009965(leaf morphogenesis);GO:0010150(leaf senescence);GO:0030154(cell differentiation);GO:0045962(positive regulation…	NA
ath-miR390a-3p	RrubChr12G00284050.1	RrubChr12G00284050	serine/arginine-rich splicing factor RS40 isoform X1 [Sesamum indicum]	GO:0000398(mRNA splicing, via spliceosome);GO:0003723(RNA binding);GO:0003729(mRNA binding);GO:0005515(protein binding);GO:0005634(nucleus);GO:0005681(spliceosomal complex);GO:0008380(RNA splicing);GO:0010445(nuclear dicing body);GO:0016607(nuclear speck);GO:0031053(primary miRNA processing)	ko03040(Spliceosome)
ath-miR390a-3p	RrubChr1G00006600.1	RrubChr1G00006600	protein PIN-LIKES 7 isoform X1 [Sesamum indicum]	GO:0005789(endoplasmic reticulum membrane);GO:0009672(auxin:proton symporter activity);GO:0009733(response to auxin);GO:0009734(auxin-activated signaling pathway);GO:0009926(auxin polar transport);GO:0016021(integral component of membrane);GO:0055085(transmembrane transport)	NA
ath-miR390a-3p	RrubChr3G00076410.1	RrubChr3G00076410	peptidyl-prolyl cis-trans isomerase NIMA-interacting 4-like [Dorcoceras hygrometricum]	GO:0003755(peptidyl-prolyl cis-trans isomerase activity);GO:0005575(cellular_component);GO:0016853(isomerase activity)	NA
ath-miR390a-3p	RrubChr4G00086560.1	RrubChr4G00086560	uncharacterized protein LOC105175071 [Sesamum indicum]	GO:0008942(nitrite reductase [NAD(P)H] activity);GO:0009507(chloroplast);GO:0009534(chloroplast thylakoid);GO:0009535(chloroplast thylakoid membrane);GO:0009941(chloroplast envelope);GO:0010207(photosystem II assembly);GO:0042128(nitrate assimilation);GO:0042549(photosystem II stabilization);GO:0051537(2 iron, 2 sulfur cluster binding);GO:0055114(oxidation-reduction process)	NA
ath-miR390a-3p	RrubChr4G00096940.1	RrubChr4G00096940	Endosomal membrane protein, EMP70 [Handroanthus impetiginosus]	GO:0016021(integral component of membrane)	NA
ath-miR390a-3p	RrubChr4G00098010.1	RrubChr4G00098010	transcription factor TCP15 [Sesamum indicum]	GO:0003677(DNA binding);GO:0003700(DNA binding transcription factor activity);GO:0005515(protein binding);GO:0005634(nucleus);GO:0006351(transcription, DNA-templated);GO:0006355(regulation of transcription, DNA-templated);GO:0008283(cell proliferation);GO:0009735(response to cytokinin);GO:0009737(response to abscisic acid);GO:0009739(response to gibberellin);GO:0010029(regulation of seed germinat…	ko04712(Circadian rhythm - plant)
ath-miR390a-3p	RrubChr4G00105290.1	RrubChr4G00105290	Placental protein 11 [Handroanthus impetiginosus]	GO:0004521(endoribonuclease activity)	NA
ath-miR390a-3p	RrubChr8G00192180.1	RrubChr8G00192180	cytochrome P450 CYP74B21 [Salvia miltiorrhiza]	GO:0004497(monooxygenase activity);GO:0009941(chloroplast envelope);GO:0016125(sterol metabolic process)	ko00592(alpha-Linolenic acid metabolism)
ath-miR390a-3p	RrubChr9G00215340.1	RrubChr9G00215340	transcription initiation factor TFIID subunit 15b [Sesamum indicum]	GO:0003723(RNA binding);GO:0005634(nucleus);GO:0006351(transcription, DNA-templated);GO:0006355(regulation of transcription, DNA-templated);GO:0009507(chloroplast);GO:0046872(metal ion binding)	NA
ath-miR390a-3p	RrubChr9G00215720.1	RrubChr9G00215720	protein NRT1/ PTR FAMILY 8.1-like [Sesamum indicum]	GO:0005215(transporter activity);GO:0005886(plasma membrane);GO:0006807(nitrogen compound metabolic process);GO:0006857(oligopeptide transport);GO:0009506(plasmodesma);GO:0015031(protein transport);GO:0016020(membrane);GO:0016021(integral component of membrane);GO:0022857(transmembrane transporter activity);GO:0042937(tripeptide transmembrane transporter activity);GO:0042938(dipeptide transport);…	NA
ath-miR390a-3p	RrubChr9G00219250.1	RrubChr9G00219250	protein ETHYLENE INSENSITIVE 3 [Sesamum indicum]	GO:0000976(transcription regulatory region sequence-specific DNA binding);GO:0001666(response to hypoxia);GO:0003677(DNA binding);GO:0003700(DNA binding transcription factor activity);GO:0005515(protein binding);GO:0005634(nucleus);GO:0006351(transcription, DNA-templated);GO:0006355(regulation of transcription, DNA-templated);GO:0009723(response to ethylene);GO:0009873(ethylene-activated signalin…	ko04016(MAPK signaling pathway - plant);ko04075(Plant hormone signal transduction)
ath-miR390a-3p	RrubChr10G00253680.1	RrubChr10G00253680	myb family transcription factor EFM [Sesamum indicum]	GO:0003677(DNA binding);GO:0003700(DNA binding transcription factor activity);GO:0005634(nucleus);GO:0006351(transcription, DNA-templated);GO:0006355(regulation of transcription, DNA-templated)	ko04075(Plant hormone signal transduction)
ath-miR390a-3p	RrubChr3G00060970.1	RrubChr3G00060970	glutamate synthase 1 [NADH], chloroplastic isoform X2 [Sesamum indicum]	GO:0005737(cytoplasm);GO:0006537(glutamate biosynthetic process);GO:0015930(glutamate synthase activity);GO:0019676(ammonia assimilation cycle)	ko00910(Nitrogen metabolism);ko00250(Alanine, aspartate and glutamate metabolism)
ath-miR390a-3p	RrubChr4G00093750.1	RrubChr4G00093750	auxilin-like protein 1 [Sesamum indicum]	GO:0016985(mannan endo-1,4-beta-mannosidase activity);GO:0046355(mannan catabolic process)	ko00051(Fructose and mannose metabolism)
ath-miR390a-3p_1ss1CT	RrubChr11G00262060.1	RrubChr11G00262060	serine carboxypeptidase-like [Sesamum indicum]	GO:0004185(serine-type carboxypeptidase activity);GO:0005773(vacuole);GO:0051603(proteolysis involved in cellular protein catabolic process)	NA
ath-miR390a-3p_1ss1CT	RrubChr1G00006600.1	RrubChr1G00006600	protein PIN-LIKES 7 isoform X1 [Sesamum indicum]	GO:0005789(endoplasmic reticulum membrane);GO:0009672(auxin:proton symporter activity);GO:0009733(response to auxin);GO:0009734(auxin-activated signaling pathway);GO:0009926(auxin polar transport);GO:0016021(integral component of membrane);GO:0055085(transmembrane transport)	NA
ath-miR390a-3p_1ss1CT	RrubChr3G00076410.1	RrubChr3G00076410	peptidyl-prolyl cis-trans isomerase NIMA-interacting 4-like [Dorcoceras hygrometricum]	GO:0003755(peptidyl-prolyl cis-trans isomerase activity);GO:0005575(cellular_component);GO:0016853(isomerase activity)	NA
ath-miR390a-3p_1ss1CT	RrubChr4G00086560.1	RrubChr4G00086560	uncharacterized protein LOC105175071 [Sesamum indicum]	GO:0008942(nitrite reductase [NAD(P)H] activity);GO:0009507(chloroplast);GO:0009534(chloroplast thylakoid);GO:0009535(chloroplast thylakoid membrane);GO:0009941(chloroplast envelope);GO:0010207(photosystem II assembly);GO:0042128(nitrate assimilation);GO:0042549(photosystem II stabilization);GO:0051537(2 iron, 2 sulfur cluster binding);GO:0055114(oxidation-reduction process)	NA
ath-miR390a-3p_1ss1CT	RrubChr4G00096940.1	RrubChr4G00096940	Endosomal membrane protein, EMP70 [Handroanthus impetiginosus]	GO:0016021(integral component of membrane)	NA
ath-miR390a-3p_1ss1CT	RrubChr4G00102340.1	RrubChr4G00102340	metal tolerance protein 1 [Sesamum indicum]	GO:0005385(zinc ion transmembrane transporter activity);GO:0005773(vacuole);GO:0010043(response to zinc ion);GO:0016020(membrane);GO:0061088(regulation of sequestering of zinc ion)	NA
ath-miR390a-3p_1ss1CT	RrubChr8G00209300.1	RrubChr8G00209300	PREDICTED: serine/threonine-protein kinase EDR1-like [Erythranthe guttata]	GO:0005524(ATP binding);GO:0005634(nucleus);GO:0016301(kinase activity);GO:0016310(phosphorylation)	NA
ath-miR390a-3p_1ss1CT	RrubChr9G00215720.1	RrubChr9G00215720	protein NRT1/ PTR FAMILY 8.1-like [Sesamum indicum]	GO:0005215(transporter activity);GO:0005886(plasma membrane);GO:0006807(nitrogen compound metabolic process);GO:0006857(oligopeptide transport);GO:0009506(plasmodesma);GO:0015031(protein transport);GO:0016020(membrane);GO:0016021(integral component of membrane);GO:0022857(transmembrane transporter activity);GO:0042937(tripeptide transmembrane transporter activity);GO:0042938(dipeptide transport);…	NA
ath-miR390a-3p_1ss1CT	RrubChr9G00233430.1	RrubChr9G00233430	Tyrosine kinase [Handroanthus impetiginosus]	GO:0004712(protein serine/threonine/tyrosine kinase activity);GO:0005524(ATP binding);GO:0005634(nucleus);GO:0005886(plasma membrane);GO:0006468(protein phosphorylation);GO:0016301(kinase activity)	NA
ath-miR390a-3p_1ss1CT	RrubChr10G00253680.1	RrubChr10G00253680	myb family transcription factor EFM [Sesamum indicum]	GO:0003677(DNA binding);GO:0003700(DNA binding transcription factor activity);GO:0005634(nucleus);GO:0006351(transcription, DNA-templated);GO:0006355(regulation of transcription, DNA-templated)	ko04075(Plant hormone signal transduction)
ath-miR390a-3p_1ss1CT	RrubChr3G00060970.1	RrubChr3G00060970	glutamate synthase 1 [NADH], chloroplastic isoform X2 [Sesamum indicum]	GO:0005737(cytoplasm);GO:0006537(glutamate biosynthetic process);GO:0015930(glutamate synthase activity);GO:0019676(ammonia assimilation cycle)	ko00910(Nitrogen metabolism);ko00250(Alanine, aspartate and glutamate metabolism)
ath-miR390a-3p_1ss1CT	RrubChr4G00093750.1	RrubChr4G00093750	auxilin-like protein 1 [Sesamum indicum]	GO:0016985(mannan endo-1,4-beta-mannosidase activity);GO:0046355(mannan catabolic process)	ko00051(Fructose and mannose metabolism)
ath-miR390a-5p	RrubChr2G00033630.1	RrubChr2G00033630	hypothetical protein CDL12_02399 [Handroanthus impetiginosus]	GO:0003674(molecular_function);GO:0008150(biological_process);GO:0009507(chloroplast);GO:0009535(chloroplast thylakoid membrane)	NA
ath-miR390a-5p	RrubChr3G00075240.1	RrubChr3G00075240	AT-rich interactive domain-containing protein 4 [Sesamum indicum]	GO:0003677(DNA binding);GO:0005622(intracellular);GO:0005634(nucleus);GO:0006351(transcription, DNA-templated);GO:0006355(regulation of transcription, DNA-templated);GO:0046872(metal ion binding)	NA
ath-miR390a-5p	RrubChr5G00127210.1	RrubChr5G00127210	Trehalose-6-phosphate synthase component TPS1 [Handroanthus impetiginosus]	GO:0003825(alpha,alpha-trehalose-phosphate synthase (UDP-forming) activity);GO:0004805(trehalose-phosphatase activity);GO:0005634(nucleus);GO:0005739(mitochondrion);GO:0005829(cytosol);GO:0005992(trehalose biosynthetic process);GO:0016757(transferase activity, transferring glycosyl groups);GO:0016791(phosphatase activity);GO:0070413(trehalose metabolism in response to stress)	ko00500(Starch and sucrose metabolism)
ath-miR390a-5p	RrubChr6G00155600.1	RrubChr6G00155600	Alanyl-tRNA synthetase [Handroanthus impetiginosus]	GO:0000049(tRNA binding);GO:0004813(alanine-tRNA ligase activity);GO:0005739(mitochondrion);GO:0005829(cytosol);GO:0006400(tRNA modification);GO:0006419(alanyl-tRNA aminoacylation);GO:0009507(chloroplast);GO:0016597(amino acid binding)	ko00970(Aminoacyl-tRNA biosynthesis)
ath-miR390a-5p	RrubChr9G00222610.1	RrubChr9G00222610	PREDICTED: uncharacterized protein LOC105949691 [Erythranthe guttata]	NA	NA
ath-miR390a-5p	RrubChr1G00003750.1	RrubChr1G00003750	4-alpha-glucanotransferase, chloroplastic/amyloplastic isoform X2 [Sesamum indicum]	GO:0000025(maltose catabolic process);GO:0004134(4-alpha-glucanotransferase activity);GO:0005983(starch catabolic process);GO:0006006(glucose metabolic process);GO:0009501(amyloplast);GO:0009507(chloroplast);GO:0102500(beta-maltose 4-alpha-glucanotransferase activity)	ko00500(Starch and sucrose metabolism)
ath-miR390a-5p	RrubChr5G00132010.1	RrubChr5G00132010	RHOMBOID-like protein 2 [Sesamum indicum]	GO:0004252(serine-type endopeptidase activity);GO:0016485(protein processing)	ko00510(N-Glycan biosynthesis)
ath-miR390a-5p	RrubChr8G00202330.1	RrubChr8G00202330	trigger factor-like protein TIG, Chloroplastic [Sesamum indicum]	GO:0003755(peptidyl-prolyl cis-trans isomerase activity);GO:0006457(protein folding);GO:0009507(chloroplast);GO:0009570(chloroplast stroma);GO:0009941(chloroplast envelope);GO:0015031(protein transport)	NA
ath-miR390a-5p_L-1	RrubChr11G00259540.1	RrubChr11G00259540	Serine/threonine protein kinase [Handroanthus impetiginosus]	GO:0004672(protein kinase activity);GO:0005524(ATP binding);GO:0005737(cytoplasm);GO:0006468(protein phosphorylation);GO:0016301(kinase activity);GO:0016310(phosphorylation)	ko04626(Plant-pathogen interaction)
ath-miR390a-5p_L-1	RrubChr11G00265630.1	RrubChr11G00265630	PREDICTED: D-xylose-proton symporter-like 3, chloroplastic [Erythranthe guttata]	GO:0005351(carbohydrate:proton symporter activity);GO:0005355(glucose transmembrane transporter activity);GO:0005887(integral component of plasma membrane);GO:0046323(glucose import)	NA
ath-miR390a-5p_L-1	RrubChr11G00274460.1	RrubChr11G00274460	Leucine rich repeat protein [Handroanthus impetiginosus]	GO:0005515(protein binding);GO:0005634(nucleus);GO:0006511(ubiquitin-dependent protein catabolic process);GO:0009723(response to ethylene);GO:0009873(ethylene-activated signaling pathway);GO:0010105(negative regulation of ethylene-activated signaling pathway);GO:0016567(protein ubiquitination);GO:0019005(SCF ubiquitin ligase complex)	ko04016(MAPK signaling pathway - plant);ko04075(Plant hormone signal transduction)
ath-miR390a-5p_L-1	RrubChr12G00297020.1	RrubChr12G00297020	probable LRR receptor-like serine/threonine-protein kinase At1g56140 [Sesamum indicum]	GO:0004674(protein serine/threonine kinase activity);GO:0005886(plasma membrane)	NA
ath-miR390a-5p_L-1	RrubChr3G00061610.1	RrubChr3G00061610	ribosomal protein subunit L2 (mitochondrion) [Neobartsia pedicularoides]	GO:0005739(mitochondrion)	NA
ath-miR390a-5p_L-1	RrubChr12G00301290.1	RrubChr12G00301290	trafficking protein particle complex II-specific subunit 120 homolog [Sesamum indicum]	GO:0005802(trans-Golgi network)	NA
ath-miR390a-5p_L-1	RrubChr1G00009140.1	RrubChr1G00009140	probable LRR receptor-like serine/threonine-protein kinase At1g67720 [Sesamum indicum]	GO:0004672(protein kinase activity);GO:0004674(protein serine/threonine kinase activity);GO:0005524(ATP binding);GO:0005576(extracellular region);GO:0005886(plasma membrane);GO:0006468(protein phosphorylation);GO:0009506(plasmodesma);GO:0016021(integral component of membrane);GO:0016301(kinase activity)	NA
ath-miR390a-5p_L-1	RrubChr1G00014710.1	RrubChr1G00014710	putative leucine-rich repeat receptor-like protein kinase [Cinnamomum micranthum f. kanehirae]	GO:0004674(protein serine/threonine kinase activity);GO:0005886(plasma membrane);GO:0006468(protein phosphorylation)	ko04626(Plant-pathogen interaction)
ath-miR390b-3p_R+1_1ss19CT	RrubChr12G00284050.1	RrubChr12G00284050	serine/arginine-rich splicing factor RS40 isoform X1 [Sesamum indicum]	GO:0000398(mRNA splicing, via spliceosome);GO:0003723(RNA binding);GO:0003729(mRNA binding);GO:0005515(protein binding);GO:0005634(nucleus);GO:0005681(spliceosomal complex);GO:0008380(RNA splicing);GO:0010445(nuclear dicing body);GO:0016607(nuclear speck);GO:0031053(primary miRNA processing)	ko03040(Spliceosome)
ath-miR390b-3p_R+1_1ss19CT	RrubChr1G00006600.1	RrubChr1G00006600	protein PIN-LIKES 7 isoform X1 [Sesamum indicum]	GO:0005789(endoplasmic reticulum membrane);GO:0009672(auxin:proton symporter activity);GO:0009733(response to auxin);GO:0009734(auxin-activated signaling pathway);GO:0009926(auxin polar transport);GO:0016021(integral component of membrane);GO:0055085(transmembrane transport)	NA
ath-miR390b-3p_R+1_1ss19CT	RrubChr3G00076410.1	RrubChr3G00076410	peptidyl-prolyl cis-trans isomerase NIMA-interacting 4-like [Dorcoceras hygrometricum]	GO:0003755(peptidyl-prolyl cis-trans isomerase activity);GO:0005575(cellular_component);GO:0016853(isomerase activity)	NA
ath-miR390b-3p_R+1_1ss19CT	RrubChr4G00086560.1	RrubChr4G00086560	uncharacterized protein LOC105175071 [Sesamum indicum]	GO:0008942(nitrite reductase [NAD(P)H] activity);GO:0009507(chloroplast);GO:0009534(chloroplast thylakoid);GO:0009535(chloroplast thylakoid membrane);GO:0009941(chloroplast envelope);GO:0010207(photosystem II assembly);GO:0042128(nitrate assimilation);GO:0042549(photosystem II stabilization);GO:0051537(2 iron, 2 sulfur cluster binding);GO:0055114(oxidation-reduction process)	NA
ath-miR390b-3p_R+1_1ss19CT	RrubChr4G00096940.1	RrubChr4G00096940	Endosomal membrane protein, EMP70 [Handroanthus impetiginosus]	GO:0016021(integral component of membrane)	NA
ath-miR390b-3p_R+1_1ss19CT	RrubChr4G00098010.1	RrubChr4G00098010	transcription factor TCP15 [Sesamum indicum]	GO:0003677(DNA binding);GO:0003700(DNA binding transcription factor activity);GO:0005515(protein binding);GO:0005634(nucleus);GO:0006351(transcription, DNA-templated);GO:0006355(regulation of transcription, DNA-templated);GO:0008283(cell proliferation);GO:0009735(response to cytokinin);GO:0009737(response to abscisic acid);GO:0009739(response to gibberellin);GO:0010029(regulation of seed germinat…	ko04712(Circadian rhythm - plant)
ath-miR390b-3p_R+1_1ss19CT	RrubChr4G00105290.1	RrubChr4G00105290	Placental protein 11 [Handroanthus impetiginosus]	GO:0004521(endoribonuclease activity)	NA
ath-miR390b-3p_R+1_1ss19CT	RrubChr8G00192180.1	RrubChr8G00192180	cytochrome P450 CYP74B21 [Salvia miltiorrhiza]	GO:0004497(monooxygenase activity);GO:0009941(chloroplast envelope);GO:0016125(sterol metabolic process)	ko00592(alpha-Linolenic acid metabolism)
ath-miR390b-3p_R+1_1ss19CT	RrubChr9G00215340.1	RrubChr9G00215340	transcription initiation factor TFIID subunit 15b [Sesamum indicum]	GO:0003723(RNA binding);GO:0005634(nucleus);GO:0006351(transcription, DNA-templated);GO:0006355(regulation of transcription, DNA-templated);GO:0009507(chloroplast);GO:0046872(metal ion binding)	NA
ath-miR390b-3p_R+1_1ss19CT	RrubChr9G00215720.1	RrubChr9G00215720	protein NRT1/ PTR FAMILY 8.1-like [Sesamum indicum]	GO:0005215(transporter activity);GO:0005886(plasma membrane);GO:0006807(nitrogen compound metabolic process);GO:0006857(oligopeptide transport);GO:0009506(plasmodesma);GO:0015031(protein transport);GO:0016020(membrane);GO:0016021(integral component of membrane);GO:0022857(transmembrane transporter activity);GO:0042937(tripeptide transmembrane transporter activity);GO:0042938(dipeptide transport);…	NA
ath-miR390b-3p_R+1_1ss19CT	RrubChr9G00219250.1	RrubChr9G00219250	protein ETHYLENE INSENSITIVE 3 [Sesamum indicum]	GO:0000976(transcription regulatory region sequence-specific DNA binding);GO:0001666(response to hypoxia);GO:0003677(DNA binding);GO:0003700(DNA binding transcription factor activity);GO:0005515(protein binding);GO:0005634(nucleus);GO:0006351(transcription, DNA-templated);GO:0006355(regulation of transcription, DNA-templated);GO:0009723(response to ethylene);GO:0009873(ethylene-activated signalin…	ko04016(MAPK signaling pathway - plant);ko04075(Plant hormone signal transduction)
ath-miR390b-3p_R+1_1ss19CT	RrubChr10G00253680.1	RrubChr10G00253680	myb family transcription factor EFM [Sesamum indicum]	GO:0003677(DNA binding);GO:0003700(DNA binding transcription factor activity);GO:0005634(nucleus);GO:0006351(transcription, DNA-templated);GO:0006355(regulation of transcription, DNA-templated)	ko04075(Plant hormone signal transduction)
ath-miR390b-3p_R+1_1ss19CT	RrubChr3G00060970.1	RrubChr3G00060970	glutamate synthase 1 [NADH], chloroplastic isoform X2 [Sesamum indicum]	GO:0005737(cytoplasm);GO:0006537(glutamate biosynthetic process);GO:0015930(glutamate synthase activity);GO:0019676(ammonia assimilation cycle)	ko00910(Nitrogen metabolism);ko00250(Alanine, aspartate and glutamate metabolism)
ath-miR390b-3p_R+1_1ss19CT	RrubChr4G00093750.1	RrubChr4G00093750	auxilin-like protein 1 [Sesamum indicum]	GO:0016985(mannan endo-1,4-beta-mannosidase activity);GO:0046355(mannan catabolic process)	ko00051(Fructose and mannose metabolism)
ath-miR393a-3p	RrubChr10G00238380.1	RrubChr10G00238380	hypothetical protein CDL12_01482 [Handroanthus impetiginosus]	GO:0003674(molecular_function);GO:0005634(nucleus);GO:0008150(biological_process)	NA
ath-miR393a-3p	RrubChr10G00241610.1	RrubChr10G00241610	ASC1-like protein isoform X1 [Sesamum indicum]	GO:0005783(endoplasmic reticulum);GO:0046513(ceramide biosynthetic process);GO:0050291(sphingosine N-acyltransferase activity)	ko00600(Sphingolipid metabolism)
ath-miR393a-3p	RrubChr11G00282150.1	RrubChr11G00282150	chaperone protein ClpB4, mitochondrial [Sesamum indicum]	GO:0005739(mitochondrion)	NA
ath-miR393a-3p	RrubChr1G00010250.1	RrubChr1G00010250	serine hydroxymethyltransferase 3, chloroplastic [Sesamum indicum]	GO:0004372(glycine hydroxymethyltransferase activity);GO:0005737(cytoplasm);GO:0005829(cytosol);GO:0006544(glycine metabolic process);GO:0006563(L-serine metabolic process);GO:0009507(chloroplast);GO:0009536(plastid);GO:0009570(chloroplast stroma);GO:0019264(glycine biosynthetic process from serine);GO:0030170(pyridoxal phosphate binding);GO:0035999(tetrahydrofolate interconversion)	ko00630(Glyoxylate and dicarboxylate metabolism);ko00260(Glycine, serine and threonine metabolism);ko00460(Cyanoamino acid metabolism);ko00670(One carbon pool by folate)
ath-miR393a-3p	RrubChr2G00043050.1	RrubChr2G00043050	phosphoenolpyruvate/phosphate translocator 2, chloroplastic isoform X1 [Sesamum indicum]	GO:0034219(carbohydrate transmembrane transport)	NA
ath-miR393a-3p	RrubChr3G00063220.1	RrubChr3G00063220	cytochrome P450 CYP72A219-like [Sesamum indicum]	GO:0004497(monooxygenase activity)	NA
ath-miR393a-3p	RrubChr4G00105110.1	RrubChr4G00105110	hypothetical protein CDL12_23160 [Handroanthus impetiginosus]	GO:0005768(endosome);GO:0005774(vacuolar membrane);GO:0005802(trans-Golgi network);GO:0008757(S-adenosylmethionine-dependent methyltransferase activity);GO:0032259(methylation)	NA
ath-miR393a-3p	RrubChr5G00116010.1	RrubChr5G00116010	PREDICTED: syntaxin-81 [Erythranthe guttata]	GO:0005783(endoplasmic reticulum);GO:0006888(ER to Golgi vesicle-mediated transport);GO:0006890(retrograde vesicle-mediated transport, Golgi to ER);GO:0031201(SNARE complex)	ko04130(SNARE interactions in vesicular transport);ko04145(Phagosome)
ath-miR393a-3p	RrubChr6G00137860.1	RrubChr6G00137860	E3 ubiquitin ligase PARAQUAT TOLERANCE 3 [Sesamum indicum]	GO:0003676(nucleic acid binding);GO:0005634(nucleus);GO:0008150(biological_process);GO:0008270(zinc ion binding);GO:0016021(integral component of membrane);GO:0016740(transferase activity)	NA
ath-miR393a-3p	RrubChr7G00183930.1	RrubChr7G00183930	cytochrome P450 CYP90B26 [Salvia miltiorrhiza]	GO:0004497(monooxygenase activity);GO:0005783(endoplasmic reticulum);GO:0007275(multicellular organism development);GO:0010268(brassinosteroid homeostasis);GO:0016125(sterol metabolic process);GO:0016132(brassinosteroid biosynthetic process)	ko00905(Brassinosteroid biosynthesis)
ath-miR393a-3p	RrubChr8G00209000.1	RrubChr8G00209000	PREDICTED: dnaJ protein homolog 1 [Theobroma cacao]	GO:0005737(cytoplasm);GO:0006457(protein folding);GO:0051082(unfolded protein binding)	NA
ath-miR393a-3p	RrubChr11G00268820.1	RrubChr11G00268820	serine/threonine protein phosphatase 2A 55 kDa regulatory subunit B beta isoform isoform X2 [Sesamum indicum]	GO:0000159(protein phosphatase type 2A complex);GO:0000166(nucleotide binding);GO:0000278(mitotic cell cycle);GO:0004722(protein serine/threonine phosphatase activity);GO:0005515(protein binding);GO:0005737(cytoplasm);GO:0005829(cytosol);GO:0006470(protein dephosphorylation);GO:0019888(protein phosphatase regulator activity);GO:0032502(developmental process);GO:0050790(regulation of catalytic act…	ko03015(mRNA surveillance pathway)
ath-miR393a-3p	RrubChr3G00082740.1	RrubChr3G00082740	uncharacterized protein LOC105158600 isoform X1 [Sesamum indicum]	GO:0004328(formamidase activity);GO:0005575(cellular_component);GO:0016811(hydrolase activity, acting on carbon-nitrogen (but not peptide) bonds, in linear amides)	ko00630(Glyoxylate and dicarboxylate metabolism);ko00910(Nitrogen metabolism);ko00460(Cyanoamino acid metabolism)
ath-miR393a-3p	RrubChr5G00116240.1	RrubChr5G00116240	PREDICTED: syntaxin-81 [Erythranthe guttata]	GO:0005783(endoplasmic reticulum);GO:0006888(ER to Golgi vesicle-mediated transport);GO:0006890(retrograde vesicle-mediated transport, Golgi to ER);GO:0031201(SNARE complex)	ko04130(SNARE interactions in vesicular transport);ko04145(Phagosome)
ath-miR393a-3p	RrubChr6G00156810.1	RrubChr6G00156810	PREDICTED: uncharacterized protein C1F8.04c-like isoform X1 [Erythranthe guttata]	GO:0004000(adenosine deaminase activity);GO:0019700(organic phosphonate catabolic process);GO:0050270(S-adenosylhomocysteine deaminase activity)	ko00230(Purine metabolism)
ath-miR393a-3p	RrubChr9G00234480.1	RrubChr9G00234480	RNA-dependent RNA polymerase 3 [Salvia miltiorrhiza]	GO:0003676(nucleic acid binding);GO:0003723(RNA binding);GO:0003887(DNA-directed DNA polymerase activity);GO:0003968(RNA-directed 5'-3' RNA polymerase activity);GO:0005634(nucleus);GO:0009616(virus induced gene silencing);GO:0010267(production of ta-siRNAs involved in RNA interference);GO:0016246(RNA interference);GO:0016441(posttranscriptional gene silencing);GO:0030422(production of siRNA invol…	NA
ath-miR393a-5p_L+1R-1	RrubChr10G00236050.1	RrubChr10G00236050	protein TRANSPORT INHIBITOR RESPONSE 1-like [Sesamum indicum]	GO:0000822(inositol hexakisphosphate binding);GO:0009734(auxin-activated signaling pathway)	ko04075(Plant hormone signal transduction)
ath-miR393a-5p_L+1R-1	RrubChr11G00261720.1	RrubChr11G00261720	protein TRANSPORT INHIBITOR RESPONSE 1-like [Sesamum indicum]	GO:0000822(inositol hexakisphosphate binding);GO:0009734(auxin-activated signaling pathway)	ko04075(Plant hormone signal transduction)
ath-miR393a-5p_L+1R-1	RrubChr1G00006690.1	RrubChr1G00006690	phosphoinositide phosphatase SAC6 [Sesamum indicum]	GO:0004439(phosphatidylinositol-4,5-bisphosphate 5-phosphatase activity);GO:0005739(mitochondrion);GO:0005783(endoplasmic reticulum);GO:0005789(endoplasmic reticulum membrane);GO:0009651(response to salt stress);GO:0016021(integral component of membrane);GO:0052866(phosphatidylinositol phosphate phosphatase activity)	ko00562(Inositol phosphate metabolism);ko04070(Phosphatidylinositol signaling system)
ath-miR393a-5p_L+1R-1	RrubChr8G00211820.1	RrubChr8G00211820	protein AUXIN SIGNALING F-BOX 2 [Sesamum indicum]	GO:0000822(inositol hexakisphosphate binding);GO:0009734(auxin-activated signaling pathway)	ko04075(Plant hormone signal transduction)
ath-MIR393a-p5_2ss18GT19AT	RrubChr10G00236050.1	RrubChr10G00236050	protein TRANSPORT INHIBITOR RESPONSE 1-like [Sesamum indicum]	GO:0000822(inositol hexakisphosphate binding);GO:0009734(auxin-activated signaling pathway)	ko04075(Plant hormone signal transduction)
ath-MIR393a-p5_2ss18GT19AT	RrubChr11G00261720.1	RrubChr11G00261720	protein TRANSPORT INHIBITOR RESPONSE 1-like [Sesamum indicum]	GO:0000822(inositol hexakisphosphate binding);GO:0009734(auxin-activated signaling pathway)	ko04075(Plant hormone signal transduction)
ath-MIR393a-p5_2ss18GT19AT	RrubChr11G00279890.1	RrubChr11G00279890	PREDICTED: LOW QUALITY PROTEIN: uncharacterized protein LOC105954914 [Erythranthe guttata]	GO:0008150(biological_process);GO:0009507(chloroplast)	ko03040(Spliceosome)
ath-MIR393a-p5_2ss18GT19AT	RrubChr2G00052090.1	RrubChr2G00052090	putative late blight resistance protein homolog R1B-16 isoform X1 [Sesamum indicum]	GO:0005524(ATP binding);GO:0005886(plasma membrane);GO:0006952(defense response);GO:0043531(ADP binding)	ko04626(Plant-pathogen interaction)
ath-MIR393a-p5_2ss18GT19AT	RrubChr4G00098040.1	RrubChr4G00098040	protein HGH1 homolog [Sesamum indicum]	GO:0003674(molecular_function);GO:0005575(cellular_component);GO:0008150(biological_process)	NA
ath-MIR393a-p5_2ss18GT19AT	RrubChr5G00126770.1	RrubChr5G00126770	NADPH-cytochrome P450 reductase [Ocimum basilicum]	GO:0030586([methionine synthase] reductase activity)	NA
ath-MIR393a-p5_2ss18GT19AT	RrubChr5G00129540.1	RrubChr5G00129540	eukaryotic translation initiation factor 3 subunit K [Sesamum indicum]	GO:0003743(translation initiation factor activity);GO:0005737(cytoplasm);GO:0005829(cytosol);GO:0005852(eukaryotic translation initiation factor 3 complex);GO:0006413(translational initiation);GO:0006446(regulation of translational initiation);GO:0043022(ribosome binding)	NA
ath-MIR393a-p5_2ss18GT19AT	RrubChr8G00208040.1	RrubChr8G00208040	PREDICTED: endonuclease 1 isoform X1 [Erythranthe guttata]	GO:0000014(single-stranded DNA endodeoxyribonuclease activity);GO:0003676(nucleic acid binding);GO:0005576(extracellular region);GO:0006308(DNA catabolic process);GO:0010150(leaf senescence);GO:0016891(endoribonuclease activity, producing 5'-phosphomonoesters);GO:0043765(T/G mismatch-specific endonuclease activity);GO:0046872(metal ion binding);GO:0080187(floral organ senescence)	NA
ath-MIR393a-p5_2ss18GT19AT	RrubChr8G00211820.1	RrubChr8G00211820	protein AUXIN SIGNALING F-BOX 2 [Sesamum indicum]	GO:0000822(inositol hexakisphosphate binding);GO:0009734(auxin-activated signaling pathway)	ko04075(Plant hormone signal transduction)
ath-MIR393a-p5_2ss18GT19AT	RrubChr9G00220740.1	RrubChr9G00220740	CRM-domain containing factor CFM3, chloroplastic/mitochondrial [Sesamum indicum]	GO:0009507(chloroplast);GO:0009737(response to abscisic acid);GO:0009793(embryo development ending in seed dormancy)	ko03018(RNA degradation)
ath-MIR393a-p5_2ss18GT19AT	RrubChr12G00284110.1	RrubChr12G00284110	threonine--tRNA ligase, mitochondrial 1 [Sesamum indicum]	GO:0003723(RNA binding);GO:0004829(threonine-tRNA ligase activity);GO:0005737(cytoplasm);GO:0006435(threonyl-tRNA aminoacylation)	ko00970(Aminoacyl-tRNA biosynthesis)
ath-MIR393a-p5_2ss18GT19AT	RrubChr1G00015020.1	RrubChr1G00015020	hypothetical protein CDL12_13263 [Handroanthus impetiginosus]	GO:0003674(molecular_function);GO:0005739(mitochondrion);GO:0008150(biological_process)	NA
ath-MIR393a-p5_2ss18GT19AT	RrubChr5G00114270.1	RrubChr5G00114270	exocyst complex component EXO70A1 [Sesamum indicum]	GO:0000145(exocyst);GO:0002237(response to molecule of bacterial origin);GO:0005515(protein binding);GO:0005634(nucleus);GO:0005829(cytosol);GO:0006887(exocytosis);GO:0006904(vesicle docking involved in exocytosis);GO:0006952(defense response);GO:0009617(response to bacterium);GO:0009620(response to fungus);GO:0012505(endomembrane system);GO:0016020(membrane);GO:0031982(vesicle);GO:0045335(phagoc…	NA
ath-MIR393a-p5_2ss18GT19AT	RrubChr8G00202230.1	RrubChr8G00202230	EH domain-containing protein 1 [Sesamum indicum]	GO:0005509(calcium ion binding);GO:0005515(protein binding);GO:0005525(GTP binding);GO:0005737(cytoplasm);GO:0005768(endosome);GO:0005886(plasma membrane);GO:0006897(endocytosis);GO:0009506(plasmodesma);GO:0010008(endosome membrane);GO:0016020(membrane);GO:0016787(hydrolase activity);GO:0032456(endocytic recycling);GO:0042538(hyperosmotic salinity response);GO:0043231(intracellular membrane-bound…	ko04144(Endocytosis)
ath-miR394a	RrubChr12G00292490.1	RrubChr12G00292490	uncharacterized protein LOC105172591 isoform X1 [Sesamum indicum]	GO:0003674(molecular_function);GO:0005634(nucleus)	NA
ath-miR394a	RrubChr12G00301160.1	RrubChr12G00301160	Molecular chaperones mortalin/PBP74/GRP75, HSP70 superfamily [Handroanthus impetiginosus]	GO:0005515(protein binding);GO:0005524(ATP binding);GO:0005622(intracellular);GO:0005623(cell);GO:0005634(nucleus);GO:0005739(mitochondrion);GO:0005829(cytosol);GO:0006457(protein folding);GO:0009408(response to heat);GO:0009409(response to cold);GO:0009507(chloroplast);GO:0009532(plastid stroma);GO:0009570(chloroplast stroma);GO:0009579(thylakoid);GO:0009941(chloroplast envelope);GO:0016032(vira…	ko03040(Spliceosome);ko04141(Protein processing in endoplasmic reticulum);ko04144(Endocytosis)
ath-miR394a	RrubChr12G00301440.1	RrubChr12G00301440	Nucleotide-sugar transporter VRG4/SQV-7 [Handroanthus impetiginosus]	GO:0034219(carbohydrate transmembrane transport)	NA
ath-miR394a	RrubChr1G00006720.1	RrubChr1G00006720	E3 ubiquitin ligase involved in syntaxin degradation [Handroanthus impetiginosus]	GO:0000795(synaptonemal complex);GO:0007131(reciprocal meiotic recombination)	NA
ath-miR394a	RrubChr1G00027720.1	RrubChr1G00027720	vacuolar protein sorting-associated protein 20 homolog 2 [Sesamum indicum]	GO:0000815(ESCRT III complex);GO:0005515(protein binding);GO:0005737(cytoplasm);GO:0005770(late endosome);GO:0005829(cytosol);GO:0005886(plasma membrane);GO:0007034(vacuolar transport);GO:0015031(protein transport);GO:0016192(vesicle-mediated transport);GO:0070676(intralumenal vesicle formation)	ko04144(Endocytosis)
ath-miR394a	RrubChr3G00064260.1	RrubChr3G00064260	probable ubiquitin-conjugating enzyme E2 26 [Sesamum indicum]	GO:0005737(cytoplasm);GO:0031625(ubiquitin protein ligase binding);GO:0061630(ubiquitin protein ligase activity)	ko04120(Ubiquitin mediated proteolysis)
ath-miR394a	RrubChr3G00065700.1	RrubChr3G00065700	hypothetical protein CDL12_10198 [Handroanthus impetiginosus]	GO:0003674(molecular_function);GO:0005737(cytoplasm);GO:0006950(response to stress);GO:0009409(response to cold);GO:0009414(response to water deprivation);GO:0009651(response to salt stress);GO:0009737(response to abscisic acid);GO:0009738(abscisic acid-activated signaling pathway);GO:0010150(leaf senescence)	NA
ath-miR394a	RrubChr4G00088020.1	RrubChr4G00088020	Molecular chaperones mortalin/PBP74/GRP75, HSP70 superfamily [Handroanthus impetiginosus]	GO:0005515(protein binding);GO:0005524(ATP binding);GO:0005622(intracellular);GO:0005623(cell);GO:0005634(nucleus);GO:0005739(mitochondrion);GO:0005829(cytosol);GO:0006457(protein folding);GO:0009408(response to heat);GO:0009409(response to cold);GO:0009507(chloroplast);GO:0009532(plastid stroma);GO:0009570(chloroplast stroma);GO:0009579(thylakoid);GO:0009941(chloroplast envelope);GO:0016032(vira…	ko03040(Spliceosome);ko04141(Protein processing in endoplasmic reticulum);ko04144(Endocytosis)
ath-miR394a	RrubChr4G00097660.1	RrubChr4G00097660	paired amphipathic helix protein Sin3-like 3 [Sesamum indicum]	GO:0000118(histone deacetylase complex);GO:0000122(negative regulation of transcription by RNA polymerase II);GO:0000785(chromatin);GO:0004407(histone deacetylase activity);GO:0016575(histone deacetylation)	NA
ath-miR394a	RrubChr4G00097690.1	RrubChr4G00097690	Serine/threonine protein kinase [Handroanthus impetiginosus]	GO:0004674(protein serine/threonine kinase activity);GO:0005886(plasma membrane);GO:0006468(protein phosphorylation);GO:0006952(defense response);GO:0009506(plasmodesma)	NA
ath-miR394a	RrubChr5G00119520.1	RrubChr5G00119520	NA	NA	NA
ath-miR394a	RrubChr6G00145630.1	RrubChr6G00145630	PREDICTED: nucleolin [Erythranthe guttata]	GO:0003723(RNA binding)	ko03040(Spliceosome)
ath-miR394a	RrubChr6G00146450.1	RrubChr6G00146450	hypothetical protein CDL12_13168 [Handroanthus impetiginosus]	NA	NA
ath-miR394a	RrubChr6G00157100.1	RrubChr6G00157100	F-box only protein 6 [Sesamum indicum]	GO:0004842(ubiquitin-protein transferase activity);GO:0010305(leaf vascular tissue pattern formation);GO:0010928(regulation of auxin mediated signaling pathway);GO:0019005(SCF ubiquitin ligase complex);GO:0031146(SCF-dependent proteasomal ubiquitin-dependent protein catabolic process);GO:0060776(simple leaf morphogenesis)	NA
ath-miR394a	RrubChr7G00165080.1	RrubChr7G00165080	brassinosteroid LRR receptor kinase-like [Sesamum indicum]	GO:0004672(protein kinase activity);GO:0004674(protein serine/threonine kinase activity);GO:0004714(transmembrane receptor protein tyrosine kinase activity);GO:0005496(steroid binding);GO:0005515(protein binding);GO:0005524(ATP binding);GO:0005768(endosome);GO:0005886(plasma membrane);GO:0009506(plasmodesma);GO:0009729(detection of brassinosteroid stimulus);GO:0009742(brassinosteroid mediated sig…	ko04075(Plant hormone signal transduction)
ath-miR394a	RrubChr7G00187220.1	RrubChr7G00187220	Porin/voltage-dependent anion-selective channel protein [Handroanthus impetiginosus]	GO:0005515(protein binding);GO:0005739(mitochondrion);GO:0005741(mitochondrial outer membrane);GO:0005773(vacuole);GO:0005774(vacuolar membrane);GO:0005794(Golgi apparatus);GO:0005886(plasma membrane);GO:0006820(anion transport);GO:0006952(defense response);GO:0008308(voltage-gated anion channel activity);GO:0009507(chloroplast);GO:0009536(plastid);GO:0009617(response to bacterium);GO:0009941(chl…	NA
ath-miR394a	RrubChr8G00198540.1	RrubChr8G00198540	hypothetical protein CDL12_15268 [Handroanthus impetiginosus]	GO:0003674(molecular_function);GO:0005737(cytoplasm);GO:0008150(biological_process)	NA
ath-miR394a	RrubChr4G00104490.1	RrubChr4G00104490	hypothetical protein CDL12_22598 [Handroanthus impetiginosus]	GO:0006508(proteolysis);GO:0008233(peptidase activity);GO:0009507(chloroplast);GO:0016021(integral component of membrane)	ko00970(Aminoacyl-tRNA biosynthesis)
ath-miR394a	RrubChr6G00151610.1	RrubChr6G00151610	Sucrose transporter [Handroanthus impetiginosus]	GO:0005351(carbohydrate:proton symporter activity);GO:0005794(Golgi apparatus);GO:0005886(plasma membrane);GO:0005985(sucrose metabolic process);GO:0008506(sucrose:proton symporter activity);GO:0008515(sucrose transmembrane transporter activity);GO:0009611(response to wounding);GO:0015144(carbohydrate transmembrane transporter activity);GO:0015293(symporter activity);GO:0015770(sucrose transport)…	NA
ath-miR394a	RrubChr8G00192150.1	RrubChr8G00192150	uncharacterized protein LOC105178567 [Sesamum indicum]	GO:0005634(nucleus);GO:0048046(apoplast)	NA
ath-miR394a	RrubChr8G00202110.1	RrubChr8G00202110	uncharacterized protein LOC105174890 [Sesamum indicum]	GO:0003674(molecular_function);GO:0005575(cellular_component);GO:0005576(extracellular region);GO:0005794(Golgi apparatus);GO:0010192(mucilage biosynthetic process);GO:0016021(integral component of membrane);GO:0047517(1,4-beta-D-xylan synthase activity);GO:0048354(mucilage biosynthetic process involved in seed coat development)	ko00514(Other types of O-glycan biosynthesis)
ath-miR394a_L+1_1ss16AG	RrubChr10G00252020.1	RrubChr10G00252020	protein WVD2-like 7 isoform X2 [Sesamum indicum]	GO:0003674(molecular_function);GO:0005634(nucleus);GO:0005737(cytoplasm);GO:0005874(microtubule);GO:0008150(biological_process)	NA
ath-miR394a_L+1_1ss16AG	RrubChr11G00262550.1	RrubChr11G00262550	vacuolar fusion protein MON1 homolog [Sesamum indicum]	GO:0012505(endomembrane system);GO:0016192(vesicle-mediated transport)	NA
ath-miR394a_L+1_1ss16AG	RrubChr12G00306000.1	RrubChr12G00306000	DEAD-box ATP-dependent RNA helicase 37 [Sesamum indicum]	GO:0004004(ATP-dependent RNA helicase activity);GO:0010501(RNA secondary structure unwinding)	NA
ath-miR394a_L+1_1ss16AG	RrubChr1G00004530.1	RrubChr1G00004530	phospho-2-dehydro-3-deoxyheptonate aldolase 2, chloroplastic [Sesamum indicum]	GO:0003849(3-deoxy-7-phosphoheptulonate synthase activity);GO:0005515(protein binding);GO:0005739(mitochondrion);GO:0009073(aromatic amino acid family biosynthetic process);GO:0009423(chorismate biosynthetic process);GO:0009507(chloroplast);GO:0009611(response to wounding);GO:0009617(response to bacterium)	ko00400(Phenylalanine, tyrosine and tryptophan biosynthesis)
ath-miR394a_L+1_1ss16AG	RrubChr1G00004940.1	RrubChr1G00004940	uncharacterized protein LOC105165944 [Sesamum indicum]	GO:0003674(molecular_function)	ko04144(Endocytosis)
ath-miR394a_L+1_1ss16AG	RrubChr1G00004950.1	RrubChr1G00004950	ATP synthase delta chain, chloroplastic [Sesamum indicum]	GO:0009409(response to cold);GO:0009507(chloroplast);GO:0009534(chloroplast thylakoid);GO:0009535(chloroplast thylakoid membrane);GO:0009579(thylakoid);GO:0009735(response to cytokinin);GO:0009772(photosynthetic electron transport in photosystem II);GO:0009773(photosynthetic electron transport in photosystem I);GO:0009941(chloroplast envelope);GO:0010287(plastoglobule);GO:0010319(stromule);GO:001…	ko00190(Oxidative phosphorylation);ko00195(Photosynthesis)
ath-miR394a_L+1_1ss16AG	RrubChr1G00016610.1	RrubChr1G00016610	hypothetical protein CDL12_10546 [Handroanthus impetiginosus]	GO:0005634(nucleus)	NA
ath-miR394a_L+1_1ss16AG	RrubChr5G00119520.1	RrubChr5G00119520	NA	NA	NA
ath-miR394a_L+1_1ss16AG	RrubChr6G00142630.1	RrubChr6G00142630	uncharacterized protein LOC105172976 [Sesamum indicum]	GO:0003674(molecular_function);GO:0004864(protein phosphatase inhibitor activity);GO:0005634(nucleus);GO:0005737(cytoplasm);GO:0005739(mitochondrion);GO:0005886(plasma membrane);GO:0008150(biological_process)	NA
ath-miR394a_L+1_1ss16AG	RrubChr6G00157100.1	RrubChr6G00157100	F-box only protein 6 [Sesamum indicum]	GO:0004842(ubiquitin-protein transferase activity);GO:0010305(leaf vascular tissue pattern formation);GO:0010928(regulation of auxin mediated signaling pathway);GO:0019005(SCF ubiquitin ligase complex);GO:0031146(SCF-dependent proteasomal ubiquitin-dependent protein catabolic process);GO:0060776(simple leaf morphogenesis)	NA
ath-miR394a_L+1_1ss16AG	RrubChr8G00202110.1	RrubChr8G00202110	uncharacterized protein LOC105174890 [Sesamum indicum]	GO:0003674(molecular_function);GO:0005575(cellular_component);GO:0005576(extracellular region);GO:0005794(Golgi apparatus);GO:0010192(mucilage biosynthetic process);GO:0016021(integral component of membrane);GO:0047517(1,4-beta-D-xylan synthase activity);GO:0048354(mucilage biosynthetic process involved in seed coat development)	ko00514(Other types of O-glycan biosynthesis)
ath-miR394a_L+1_1ss16AG	RrubChr10G00249250.1	RrubChr10G00249250	Multicopper oxidase [Handroanthus impetiginosus]	GO:0005507(copper ion binding);GO:0009809(lignin biosynthetic process);GO:0016722(oxidoreductase activity, oxidizing metal ions)	NA
ath-miR394a_L+1_1ss16AG	RrubChr4G00094970.1	RrubChr4G00094970	uncharacterized protein At2g23090-like [Solanum pennellii]	GO:0003674(molecular_function);GO:0008150(biological_process)	NA
ath-miR395a	RrubChr10G00246750.1	RrubChr10G00246750	ATP sulfurylase 1, chloroplastic-like [Sesamum indicum]	GO:0000103(sulfate assimilation);GO:0004020(adenylylsulfate kinase activity)	ko00920(Sulfur metabolism);ko00230(Purine metabolism);ko00450(Selenocompound metabolism);ko00261(Monobactam biosynthesis)
ath-miR395a	RrubChr1G00005180.1	RrubChr1G00005180	low affinity sulfate transporter 3 [Sesamum indicum]	GO:0005887(integral component of plasma membrane);GO:0015116(sulfate transmembrane transporter activity)	NA
ath-miR395a	RrubChr6G00140360.1	RrubChr6G00140360	CDPK-related kinase 3 [Sesamum indicum]	GO:0004683(calmodulin-dependent protein kinase activity);GO:0005516(calmodulin binding);GO:0005634(nucleus);GO:0005737(cytoplasm);GO:0005886(plasma membrane);GO:0009738(abscisic acid-activated signaling pathway);GO:0009931(calcium-dependent protein serine/threonine kinase activity);GO:0018105(peptidyl-serine phosphorylation);GO:0035556(intracellular signal transduction);GO:0046777(protein autopho…	NA
ath-miR395a	RrubChr7G00184530.1	RrubChr7G00184530	ATP sulfurylase 1, chloroplastic-like [Sesamum indicum]	GO:0000103(sulfate assimilation);GO:0004020(adenylylsulfate kinase activity)	ko00920(Sulfur metabolism);ko00230(Purine metabolism);ko00450(Selenocompound metabolism);ko00261(Monobactam biosynthesis)
ath-miR395a	RrubChr8G00192630.1	RrubChr8G00192630	hypothetical protein MIMGU_mgv1a021638mg [Erythranthe guttata]	GO:0003674(molecular_function);GO:0005575(cellular_component);GO:0008150(biological_process)	NA
ath-miR395a	RrubChr8G00209330.1	RrubChr8G00209330	Transcription factor GT-2 [Handroanthus impetiginosus]	GO:0003700(DNA binding transcription factor activity);GO:0005515(protein binding);GO:0005634(nucleus);GO:0006355(regulation of transcription, DNA-templated)	NA
ath-miR395a	RrubChr12G00282840.1	RrubChr12G00282840	acyltransferase ACT3 [Plectranthus barbatus]	GO:0005737(cytoplasm);GO:0016740(transferase activity);GO:0016747(transferase activity, transferring acyl groups other than amino-acyl groups)	ko00940(Phenylpropanoid biosynthesis);ko00945(Stilbenoid, diarylheptanoid and gingerol biosynthesis);ko00941(Flavonoid biosynthesis)
ath-miR395a	RrubChr3G00059140.1	RrubChr3G00059140	GATA transcription factor 8-like [Sesamum indicum]	GO:0000977(RNA polymerase II regulatory region sequence-specific DNA binding);GO:0001085(RNA polymerase II transcription factor binding);GO:0001228(transcriptional activator activity, RNA polymerase II transcription regulatory region sequence-specific DNA binding);GO:0003682(chromatin binding);GO:0005634(nucleus);GO:0005667(transcription factor complex);GO:0030154(cell differentiation)	NA
ath-miR395a	RrubChr6G00139760.1	RrubChr6G00139760	protein NRT1/ PTR FAMILY 5.7 [Sesamum indicum]	GO:0005886(plasma membrane);GO:0006857(oligopeptide transport);GO:0016020(membrane);GO:0016021(integral component of membrane);GO:0022857(transmembrane transporter activity);GO:0055085(transmembrane transport)	NA
ath-miR395a_L+2R-1	RrubChr10G00246750.1	RrubChr10G00246750	ATP sulfurylase 1, chloroplastic-like [Sesamum indicum]	GO:0000103(sulfate assimilation);GO:0004020(adenylylsulfate kinase activity)	ko00920(Sulfur metabolism);ko00230(Purine metabolism);ko00450(Selenocompound metabolism);ko00261(Monobactam biosynthesis)
ath-miR395a_L+2R-1	RrubChr12G00282840.1	RrubChr12G00282840	acyltransferase ACT3 [Plectranthus barbatus]	GO:0005737(cytoplasm);GO:0016740(transferase activity);GO:0016747(transferase activity, transferring acyl groups other than amino-acyl groups)	ko00940(Phenylpropanoid biosynthesis);ko00945(Stilbenoid, diarylheptanoid and gingerol biosynthesis);ko00941(Flavonoid biosynthesis)
ath-miR395a_L+2R-1	RrubChr12G00289710.1	RrubChr12G00289710	adhesive plaque matrix protein [Sesamum indicum]	GO:0005509(calcium ion binding);GO:0005544(calcium-dependent phospholipid binding);GO:0005886(plasma membrane)	NA
ath-miR395a_L+2R-1	RrubChr1G00005180.1	RrubChr1G00005180	low affinity sulfate transporter 3 [Sesamum indicum]	GO:0005887(integral component of plasma membrane);GO:0015116(sulfate transmembrane transporter activity)	NA
ath-miR395a_L+2R-1	RrubChr2G00042960.1	RrubChr2G00042960	universal stress protein A-like protein [Sesamum indicum]	GO:0005737(cytoplasm);GO:0006950(response to stress);GO:0016787(hydrolase activity)	NA
ath-miR395a_L+2R-1	RrubChr2G00044920.1	RrubChr2G00044920	60s ribosomal protein L15/L27 [Handroanthus impetiginosus]	GO:0003735(structural constituent of ribosome);GO:0022625(cytosolic large ribosomal subunit)	ko03010(Ribosome)
ath-miR395a_L+2R-1	RrubChr3G00067280.1	RrubChr3G00067280	uroporphyrinogen decarboxylase [Sesamum indicum]	GO:0004853(uroporphyrinogen decarboxylase activity);GO:0005829(cytosol);GO:0006783(heme biosynthetic process)	ko00860(Porphyrin and chlorophyll metabolism)
ath-miR395a_L+2R-1	RrubChr6G00143840.1	RrubChr6G00143840	unnamed protein product [Coffea canephora]	GO:0005778(peroxisomal membrane);GO:0016559(peroxisome fission);GO:0044375(regulation of peroxisome size)	ko04146(Peroxisome)
ath-miR395a_L+2R-1	RrubChr7G00184530.1	RrubChr7G00184530	ATP sulfurylase 1, chloroplastic-like [Sesamum indicum]	GO:0000103(sulfate assimilation);GO:0004020(adenylylsulfate kinase activity)	ko00920(Sulfur metabolism);ko00230(Purine metabolism);ko00450(Selenocompound metabolism);ko00261(Monobactam biosynthesis)
ath-miR395a_L+2R-1	RrubChr12G00291210.1	RrubChr12G00291210	protein TSS [Sesamum indicum]	GO:0005737(cytoplasm);GO:0005829(cytosol);GO:0008150(biological_process)	NA
ath-miR396a-3p_1ss9AC	RrubChr11G00277220.1	RrubChr11G00277220	proline dehydrogenase 2, mitochondrial-like [Olea europaea var. sylvestris]	GO:0004657(proline dehydrogenase activity);GO:0005739(mitochondrion);GO:0006537(glutamate biosynthetic process);GO:0006562(proline catabolic process);GO:0006970(response to osmotic stress);GO:0009414(response to water deprivation);GO:0010133(proline catabolic process to glutamate);GO:0055114(oxidation-reduction process)	ko00330(Arginine and proline metabolism)
ath-miR396a-3p_1ss9AC	RrubChr11G00278670.1	RrubChr11G00278670	PREDICTED: tubulin alpha chain [Erythranthe guttata]	GO:0000226(microtubule cytoskeleton organization);GO:0003924(GTPase activity);GO:0005200(structural constituent of cytoskeleton);GO:0005515(protein binding);GO:0005525(GTP binding);GO:0005618(cell wall);GO:0005730(nucleolus);GO:0005737(cytoplasm);GO:0005773(vacuole);GO:0005829(cytosol);GO:0005874(microtubule);GO:0005886(plasma membrane);GO:0007017(microtubule-based process);GO:0009506(plasmodesma…	ko04145(Phagosome)
ath-miR396a-3p_L-1_1ss7TG	RrubChr10G00256930.1	RrubChr10G00256930	PREDICTED: callose synthase 9 [Erythranthe guttata]	GO:0000148(1,3-beta-D-glucan synthase complex);GO:0003843(1,3-beta-D-glucan synthase activity);GO:0005886(plasma membrane)	NA
ath-miR396a-3p_L-1_1ss7TG	RrubChr11G00274200.1	RrubChr11G00274200	NA	NA	NA
ath-miR396a-3p_L-1_1ss7TG	RrubChr4G00106890.1	RrubChr4G00106890	hypothetical protein CDL12_24746 [Handroanthus impetiginosus]	GO:0003674(molecular_function);GO:0005886(plasma membrane);GO:0008150(biological_process);GO:0016021(integral component of membrane)	NA
ath-miR396a-3p_L-1_1ss7TG	RrubChr5G00134210.1	RrubChr5G00134210	hypothetical protein CUMW_007130 [Citrus unshiu]	GO:0005515(protein binding)	ko04016(MAPK signaling pathway - plant);ko04070(Phosphatidylinositol signaling system);ko04626(Plant-pathogen interaction)
ath-miR396a-3p_L-1_1ss7TG	RrubChr6G00161340.1	RrubChr6G00161340	Flavonol reductase/cinnamoyl-CoA reductase [Handroanthus impetiginosus]	GO:0005575(cellular_component);GO:0009809(lignin biosynthetic process);GO:0016621(cinnamoyl-CoA reductase activity);GO:0080167(response to karrikin)	ko00940(Phenylpropanoid biosynthesis)
ath-miR396a-3p_L-1_1ss7TG	RrubChr10G00259320.1	RrubChr10G00259320	callose synthase 9 [Sesamum indicum]	GO:0000148(1,3-beta-D-glucan synthase complex);GO:0003843(1,3-beta-D-glucan synthase activity);GO:0005886(plasma membrane)	NA
ath-miR396a-3p_L-1_1ss7TG	RrubChr1G00003330.1	RrubChr1G00003330	vesicle-associated membrane protein 721-like [Sesamum indicum]	GO:0000149(SNARE binding);GO:0005484(SNAP receptor activity);GO:0006887(exocytosis);GO:0006906(vesicle fusion);GO:0031201(SNARE complex)	NA
ath-miR396a-3p_R+1_1ss9AC	RrubChr11G00277220.1	RrubChr11G00277220	proline dehydrogenase 2, mitochondrial-like [Olea europaea var. sylvestris]	GO:0004657(proline dehydrogenase activity);GO:0005739(mitochondrion);GO:0006537(glutamate biosynthetic process);GO:0006562(proline catabolic process);GO:0006970(response to osmotic stress);GO:0009414(response to water deprivation);GO:0010133(proline catabolic process to glutamate);GO:0055114(oxidation-reduction process)	ko00330(Arginine and proline metabolism)
ath-miR396a-3p_R+1_1ss9AC	RrubChr7G00186650.1	RrubChr7G00186650	expansin-A10 [Sesamum indicum]	GO:0005199(structural constituent of cell wall);GO:0005576(extracellular region);GO:0005618(cell wall);GO:0006949(syncytium formation);GO:0009505(plant-type cell wall);GO:0009664(plant-type cell wall organization);GO:0009826(unidimensional cell growth);GO:0009828(plant-type cell wall loosening);GO:0009831(plant-type cell wall modification involved in multidimensional cell growth);GO:0016020(membr…	NA
ath-miR396a-5p	RrubChr10G00235430.1	RrubChr10G00235430	DNA replication licensing factor, MCM7 component [Handroanthus impetiginosus]	GO:0000347(THO complex);GO:0003677(DNA binding);GO:0003678(DNA helicase activity);GO:0005515(protein binding);GO:0005524(ATP binding);GO:0005634(nucleus);GO:0005737(cytoplasm);GO:0005829(cytosol);GO:0006268(DNA unwinding involved in DNA replication);GO:0006270(DNA replication initiation);GO:0006351(transcription, DNA-templated);GO:0006355(regulation of transcription, DNA-templated);GO:0007049(cel…	ko03030(DNA replication)
ath-miR396a-5p	RrubChr10G00239190.1	RrubChr10G00239190	homeobox-leucine zipper protein ATHB-12 [Sesamum indicum]	GO:0003700(DNA binding transcription factor activity);GO:0005515(protein binding);GO:0005634(nucleus);GO:0006351(transcription, DNA-templated);GO:0006355(regulation of transcription, DNA-templated);GO:0009414(response to water deprivation);GO:0009737(response to abscisic acid);GO:0009738(abscisic acid-activated signaling pathway);GO:0043565(sequence-specific DNA binding);GO:0045893(positive regul…	NA
ath-miR396a-5p	RrubChr10G00245870.1	RrubChr10G00245870	growth-regulating factor 2 [Sesamum indicum]	GO:0005524(ATP binding);GO:0005634(nucleus);GO:0006351(transcription, DNA-templated);GO:0006355(regulation of transcription, DNA-templated);GO:0010114(response to red light);GO:0010218(response to far red light);GO:0048366(leaf development);GO:0080167(response to karrikin)	NA
ath-miR396a-5p	RrubChr10G00256940.1	RrubChr10G00256940	formate--tetrahydrofolate ligase [Sesamum indicum]	GO:0004329(formate-tetrahydrofolate ligase activity);GO:0004477(methenyltetrahydrofolate cyclohydrolase activity);GO:0004488(methylenetetrahydrofolate dehydrogenase (NADP+) activity);GO:0005507(copper ion binding);GO:0005524(ATP binding);GO:0005737(cytoplasm);GO:0005829(cytosol);GO:0005886(plasma membrane);GO:0009113(purine nucleobase biosynthetic process);GO:0009257(10-formyltetrahydrofolate bio…	ko00670(One carbon pool by folate)
ath-miR396a-5p	RrubChr11G00269770.1	RrubChr11G00269770	photosystem II reaction center W protein, chloroplastic [Sesamum indicum]	GO:0003674(molecular_function);GO:0009507(chloroplast);GO:0009523(photosystem II);GO:0009535(chloroplast thylakoid membrane);GO:0015979(photosynthesis);GO:0016021(integral component of membrane);GO:0042549(photosystem II stabilization)	ko00195(Photosynthesis)
ath-miR396a-5p	RrubChr11G00270010.1	RrubChr11G00270010	protein transport protein Sec24-like At3g07100 [Sesamum indicum]	GO:0000139(Golgi membrane);GO:0005215(transporter activity);GO:0005515(protein binding);GO:0005737(cytoplasm);GO:0005789(endoplasmic reticulum membrane);GO:0005829(cytosol);GO:0006810(transport);GO:0006886(intracellular protein transport);GO:0006888(ER to Golgi vesicle-mediated transport);GO:0007029(endoplasmic reticulum organization);GO:0007030(Golgi organization);GO:0008270(zinc ion binding);GO…	ko04141(Protein processing in endoplasmic reticulum)
ath-miR396a-5p	RrubChr11G00271640.1	RrubChr11G00271640	growth-regulating factor 4-like isoform X3 [Sesamum indicum]	GO:0005737(cytoplasm);GO:0008757(S-adenosylmethionine-dependent methyltransferase activity);GO:0032259(methylation)	NA
ath-miR396a-5p	RrubChr11G00274200.1	RrubChr11G00274200	NA	NA	NA
ath-miR396a-5p	RrubChr11G00281260.1	RrubChr11G00281260	uncharacterized protein LOC105166397 [Sesamum indicum]	NA	NA
ath-miR396a-5p	RrubChr12G00290410.1	RrubChr12G00290410	D-glycerate 3-kinase, chloroplastic [Sesamum indicum]	GO:0004849(uridine kinase activity);GO:0005829(cytosol);GO:0006206(pyrimidine nucleobase metabolic process);GO:0043097(pyrimidine nucleoside salvage)	ko00630(Glyoxylate and dicarboxylate metabolism);ko00561(Glycerolipid metabolism);ko00260(Glycine, serine and threonine metabolism)
ath-miR396a-5p	RrubChr12G00302900.1	RrubChr12G00302900	RNA-directed DNA methylation 4 [Olea europaea var. sylvestris]	GO:0003700(DNA binding transcription factor activity);GO:0005634(nucleus);GO:0006306(DNA methylation);GO:0006342(chromatin silencing);GO:0006355(regulation of transcription, DNA-templated);GO:0009791(post-embryonic development);GO:0031047(gene silencing by RNA);GO:0032502(developmental process)	NA
ath-miR396a-5p	RrubChr1G00016990.1	RrubChr1G00016990	growth-regulating factor 6 [Sesamum indicum]	GO:0005515(protein binding);GO:0005524(ATP binding);GO:0005634(nucleus);GO:0006351(transcription, DNA-templated);GO:0006355(regulation of transcription, DNA-templated);GO:0009624(response to nematode);GO:0019760(glucosinolate metabolic process);GO:0043565(sequence-specific DNA binding);GO:0048364(root development);GO:0048366(leaf development);GO:0061062(regulation of nematode larval development)	NA
ath-miR396a-5p	RrubChr2G00030860.1	RrubChr2G00030860	GDSL esterase/lipase At3g48460 [Sesamum indicum]	GO:0005576(extracellular region);GO:0006631(fatty acid metabolic process);GO:0008126(acetylesterase activity);GO:0016042(lipid catabolic process);GO:0052689(carboxylic ester hydrolase activity)	ko00901(Indole alkaloid biosynthesis)
ath-miR396a-5p	RrubChr2G00047150.1	RrubChr2G00047150	Monodehydroascorbate/ferredoxin reductase [Handroanthus impetiginosus]	GO:0005737(cytoplasm);GO:0005777(peroxisome);GO:0005782(peroxisomal matrix);GO:0005829(cytosol);GO:0005886(plasma membrane);GO:0009507(chloroplast);GO:0016656(monodehydroascorbate reductase (NADH) activity);GO:0042744(hydrogen peroxide catabolic process);GO:0046686(response to cadmium ion);GO:0048046(apoplast);GO:0050660(flavin adenine dinucleotide binding);GO:0055114(oxidation-reduction process)	ko00053(Ascorbate and aldarate metabolism)
ath-miR396a-5p	RrubChr2G00047200.1	RrubChr2G00047200	hypothetical protein CDL12_10521 [Handroanthus impetiginosus]	GO:0005515(protein binding);GO:0005524(ATP binding);GO:0005634(nucleus);GO:0006351(transcription, DNA-templated);GO:0006355(regulation of transcription, DNA-templated);GO:0008285(negative regulation of cell proliferation);GO:0009624(response to nematode);GO:0043565(sequence-specific DNA binding);GO:0044212(transcription regulatory region DNA binding);GO:0048364(root development);GO:0048366(leaf d…	NA
ath-miR396a-5p	RrubChr3G00066210.1	RrubChr3G00066210	heat shock protein 83 [Sesamum indicum]	GO:0005515(protein binding);GO:0005524(ATP binding);GO:0005730(nucleolus);GO:0005737(cytoplasm);GO:0005794(Golgi apparatus);GO:0005829(cytosol);GO:0005886(plasma membrane);GO:0006457(protein folding);GO:0009408(response to heat);GO:0016020(membrane);GO:0045087(innate immune response);GO:0051082(unfolded protein binding);GO:0051131(chaperone-mediated protein complex assembly);GO:0071277(cellular r…	ko04141(Protein processing in endoplasmic reticulum);ko04626(Plant-pathogen interaction)
ath-miR396a-5p	RrubChr3G00069620.1	RrubChr3G00069620	hypothetical protein CDL12_18159 [Handroanthus impetiginosus]	GO:0003674(molecular_function);GO:0009507(chloroplast);GO:0009570(chloroplast stroma)	NA
ath-miR396a-5p	RrubChr3G00076930.1	RrubChr3G00076930	putative hydrolase (HAD superfamily) [Handroanthus impetiginosus]	GO:0008152(metabolic process);GO:0016787(hydrolase activity)	NA
ath-miR396a-5p	RrubChr4G00086250.1	RrubChr4G00086250	Filamentous baseplate protein Ligatin, contains PUA domain [Handroanthus impetiginosus]	GO:0003743(translation initiation factor activity);GO:0006413(translational initiation)	NA
ath-miR396a-5p	RrubChr4G00095680.1	RrubChr4G00095680	alpha-amylase [Sesamum indicum]	GO:0004556(alpha-amylase activity);GO:0005983(starch catabolic process);GO:0005987(sucrose catabolic process)	ko00500(Starch and sucrose metabolism)
ath-miR396a-5p	RrubChr5G00128130.1	RrubChr5G00128130	uncharacterized protein LOC105166375 [Sesamum indicum]	GO:0003674(molecular_function);GO:0005768(endosome);GO:0005783(endoplasmic reticulum);GO:0005794(Golgi apparatus);GO:0005802(trans-Golgi network);GO:0016021(integral component of membrane);GO:0042538(hyperosmotic salinity response);GO:0043182(vacuolar sequestering of sodium ion)	NA
ath-miR396a-5p	RrubChr5G00130060.1	RrubChr5G00130060	growth-regulating factor 1 isoform X1 [Sesamum indicum]	GO:0005634(nucleus);GO:0009739(response to gibberellin);GO:0030912(response to deep water)	NA
ath-miR396a-5p	RrubChr5G00132150.1	RrubChr5G00132150	hypothetical protein CDL12_26989 [Handroanthus impetiginosus]	GO:0005515(protein binding);GO:0005634(nucleus);GO:0005739(mitochondrion);GO:0005829(cytosol);GO:0051087(chaperone binding);GO:0071629(cytoplasm protein quality control by the ubiquitin-proteasome system)	ko04141(Protein processing in endoplasmic reticulum)
ath-miR396a-5p	RrubChr6G00144230.1	RrubChr6G00144230	growth-regulating factor 9 [Sesamum indicum]	GO:0005515(protein binding);GO:0005524(ATP binding);GO:0005634(nucleus);GO:0006351(transcription, DNA-templated);GO:0006355(regulation of transcription, DNA-templated);GO:0032502(developmental process);GO:0048366(leaf development)	NA
ath-miR396a-5p	RrubChr6G00146410.1	RrubChr6G00146410	uncharacterized protein LOC105169799 isoform X2 [Sesamum indicum]	GO:0003674(molecular_function);GO:0008150(biological_process)	NA
ath-miR396a-5p	RrubChr6G00148620.1	RrubChr6G00148620	probable aspartyl protease At4g16563 [Sesamum indicum]	GO:0004190(aspartic-type endopeptidase activity);GO:0006508(proteolysis);GO:0030163(protein catabolic process)	NA
ath-miR396a-5p	RrubChr6G00149860.1	RrubChr6G00149860	RNA polymerase, 25-kDa subunit (common to polymerases I, II and III) [Handroanthus impetiginosus]	GO:0000428(DNA-directed RNA polymerase complex);GO:0001054(RNA polymerase I activity);GO:0001055(RNA polymerase II activity);GO:0001056(RNA polymerase III activity);GO:0003899(DNA-directed 5'-3' RNA polymerase activity);GO:0005665(DNA-directed RNA polymerase II, core complex);GO:0005666(DNA-directed RNA polymerase III complex);GO:0005736(DNA-directed RNA polymerase I complex)	ko00230(Purine metabolism);ko00240(Pyrimidine metabolism);ko03020(RNA polymerase)
ath-miR396a-5p	RrubChr6G00155090.1	RrubChr6G00155090	growth-regulating factor 2 [Sesamum indicum]	GO:0005634(nucleus);GO:0009739(response to gibberellin);GO:0030912(response to deep water)	NA
ath-miR396a-5p	RrubChr7G00175830.1	RrubChr7G00175830	transcription factor bHLH78 [Sesamum indicum]	GO:0003677(DNA binding);GO:0003700(DNA binding transcription factor activity);GO:0005634(nucleus);GO:0006351(transcription, DNA-templated);GO:0006355(regulation of transcription, DNA-templated);GO:0046983(protein dimerization activity)	NA
ath-miR396a-5p	RrubChr7G00182120.1	RrubChr7G00182120	growth-regulating factor 1 [Sesamum indicum]	GO:0005515(protein binding);GO:0005524(ATP binding);GO:0005634(nucleus);GO:0006351(transcription, DNA-templated);GO:0006355(regulation of transcription, DNA-templated);GO:0009624(response to nematode);GO:0019760(glucosinolate metabolic process);GO:0043565(sequence-specific DNA binding);GO:0048364(root development);GO:0048366(leaf development);GO:0061062(regulation of nematode larval development)	NA
ath-miR396a-5p	RrubChr9G00213690.1	RrubChr9G00213690	E3 ubiquitin-protein ligase CHIP isoform X1 [Sesamum indicum]	GO:0004842(ubiquitin-protein transferase activity);GO:0005515(protein binding);GO:0005737(cytoplasm);GO:0009266(response to temperature stimulus);GO:0009651(response to salt stress);GO:0009737(response to abscisic acid);GO:0016567(protein ubiquitination);GO:0051087(chaperone binding)	ko04141(Protein processing in endoplasmic reticulum);ko04120(Ubiquitin mediated proteolysis)
ath-miR396a-5p	RrubChr9G00229140.1	RrubChr9G00229140	growth-regulating factor 4-like isoform X1 [Sesamum indicum]	GO:0005737(cytoplasm);GO:0008757(S-adenosylmethionine-dependent methyltransferase activity);GO:0032259(methylation)	NA
ath-miR396a-5p	RrubChr9G00234220.1	RrubChr9G00234220	PREDICTED: uncharacterized protein LOC105977041 [Erythranthe guttata]	GO:0005634(nucleus)	NA
ath-miR396a-5p	RrubChr11G00267500.1	RrubChr11G00267500	hypothetical protein CDL12_18992 [Handroanthus impetiginosus]	GO:0004518(nuclease activity);GO:0005622(intracellular);GO:0005634(nucleus);GO:0006281(DNA repair)	NA
ath-miR396a-5p	RrubChr3G00060390.1	RrubChr3G00060390	2-hydroxyacyl-CoA lyase [Sesamum indicum]	GO:0000287(magnesium ion binding);GO:0001561(fatty acid alpha-oxidation);GO:0004737(pyruvate decarboxylase activity);GO:0005777(peroxisome);GO:0005829(cytosol);GO:0009507(chloroplast);GO:0016831(carboxy-lyase activity);GO:0030976(thiamine pyrophosphate binding)	ko04146(Peroxisome)
ath-miR396a-5p	RrubChr3G00065810.1	RrubChr3G00065810	tripeptidyl-peptidase 2 isoform X4 [Sesamum indicum]	GO:0004252(serine-type endopeptidase activity)	NA
ath-miR396a-5p	RrubChr4G00089310.1	RrubChr4G00089310	KRR1-interacting protein involved in 40S ribosome biogenesis [Handroanthus impetiginosus]	GO:0003674(molecular_function);GO:0005634(nucleus);GO:0005829(cytosol);GO:0030686(90S preribosome)	NA
ath-miR396a-5p	RrubChr4G00090340.1	RrubChr4G00090340	uncharacterized protein LOC105155442 [Sesamum indicum]	NA	NA
ath-miR396a-5p	RrubChr4G00092320.1	RrubChr4G00092320	uncharacterized protein LOC105166052 isoform X1 [Sesamum indicum]	GO:0003746(translation elongation factor activity);GO:0005634(nucleus);GO:0006414(translational elongation)	ko03040(Spliceosome);ko03013(RNA transport);ko03015(mRNA surveillance pathway)
ath-miR396a-5p	RrubChr4G00094200.1	RrubChr4G00094200	lariat debranching enzyme [Sesamum indicum]	GO:0000398(mRNA splicing, via spliceosome);GO:0005634(nucleus);GO:0008419(RNA lariat debranching enzyme activity);GO:0090502(RNA phosphodiester bond hydrolysis, endonucleolytic)	NA
ath-miR396a-5p	RrubChr6G00152370.1	RrubChr6G00152370	uncharacterized protein LOC105168204 [Sesamum indicum]	GO:0005634(nucleus)	NA
ath-miR396a-5p	RrubChr6G00163990.1	RrubChr6G00163990	hypothetical protein MIMGU_mgv1a023002mg [Erythranthe guttata]	GO:0005524(ATP binding);GO:0006952(defense response);GO:0043531(ADP binding)	ko04626(Plant-pathogen interaction)
ath-miR396a-5p	RrubChr7G00166140.1	RrubChr7G00166140	probable receptor-like protein kinase At5g18500 [Sesamum indicum]	GO:0004674(protein serine/threonine kinase activity);GO:0005524(ATP binding);GO:0005886(plasma membrane);GO:0016021(integral component of membrane);GO:0016301(kinase activity);GO:0046777(protein autophosphorylation)	NA
ath-miR396a-5p	RrubChr8G00199450.1	RrubChr8G00199450	PREDICTED: uncharacterized protein LOC105968055 [Erythranthe guttata]	GO:0005515(protein binding);GO:0005634(nucleus);GO:0005783(endoplasmic reticulum);GO:0005789(endoplasmic reticulum membrane);GO:0006914(autophagy);GO:0015031(protein transport);GO:0016021(integral component of membrane);GO:0043231(intracellular membrane-bounded organelle)	NA
ath-miR396a-5p_1ss2TC	RrubChr10G00245870.1	RrubChr10G00245870	growth-regulating factor 2 [Sesamum indicum]	GO:0005524(ATP binding);GO:0005634(nucleus);GO:0006351(transcription, DNA-templated);GO:0006355(regulation of transcription, DNA-templated);GO:0010114(response to red light);GO:0010218(response to far red light);GO:0048366(leaf development);GO:0080167(response to karrikin)	NA
ath-miR396a-5p_1ss2TC	RrubChr11G00271640.1	RrubChr11G00271640	growth-regulating factor 4-like isoform X3 [Sesamum indicum]	GO:0005737(cytoplasm);GO:0008757(S-adenosylmethionine-dependent methyltransferase activity);GO:0032259(methylation)	NA
ath-miR396a-5p_1ss2TC	RrubChr11G00274200.1	RrubChr11G00274200	NA	NA	NA
ath-miR396a-5p_1ss2TC	RrubChr11G00281260.1	RrubChr11G00281260	uncharacterized protein LOC105166397 [Sesamum indicum]	NA	NA
ath-miR396a-5p_1ss2TC	RrubChr1G00016990.1	RrubChr1G00016990	growth-regulating factor 6 [Sesamum indicum]	GO:0005515(protein binding);GO:0005524(ATP binding);GO:0005634(nucleus);GO:0006351(transcription, DNA-templated);GO:0006355(regulation of transcription, DNA-templated);GO:0009624(response to nematode);GO:0019760(glucosinolate metabolic process);GO:0043565(sequence-specific DNA binding);GO:0048364(root development);GO:0048366(leaf development);GO:0061062(regulation of nematode larval development)	NA
ath-miR396a-5p_1ss2TC	RrubChr2G00047150.1	RrubChr2G00047150	Monodehydroascorbate/ferredoxin reductase [Handroanthus impetiginosus]	GO:0005737(cytoplasm);GO:0005777(peroxisome);GO:0005782(peroxisomal matrix);GO:0005829(cytosol);GO:0005886(plasma membrane);GO:0009507(chloroplast);GO:0016656(monodehydroascorbate reductase (NADH) activity);GO:0042744(hydrogen peroxide catabolic process);GO:0046686(response to cadmium ion);GO:0048046(apoplast);GO:0050660(flavin adenine dinucleotide binding);GO:0055114(oxidation-reduction process)	ko00053(Ascorbate and aldarate metabolism)
ath-miR396a-5p_1ss2TC	RrubChr2G00047200.1	RrubChr2G00047200	hypothetical protein CDL12_10521 [Handroanthus impetiginosus]	GO:0005515(protein binding);GO:0005524(ATP binding);GO:0005634(nucleus);GO:0006351(transcription, DNA-templated);GO:0006355(regulation of transcription, DNA-templated);GO:0008285(negative regulation of cell proliferation);GO:0009624(response to nematode);GO:0043565(sequence-specific DNA binding);GO:0044212(transcription regulatory region DNA binding);GO:0048364(root development);GO:0048366(leaf d…	NA
ath-miR396a-5p_1ss2TC	RrubChr4G00087050.1	RrubChr4G00087050	patellin-3 [Sesamum indicum]	GO:0005215(transporter activity);GO:0005634(nucleus);GO:0005829(cytosol);GO:0005886(plasma membrane);GO:0006810(transport);GO:0007049(cell cycle);GO:0008289(lipid binding);GO:0051301(cell division)	NA
ath-miR396a-5p_1ss2TC	RrubChr5G00125250.1	RrubChr5G00125250	cytochrome P450 CYP716C10 [Plectranthus barbatus]	GO:0004497(monooxygenase activity);GO:0007275(multicellular organism development);GO:0010268(brassinosteroid homeostasis);GO:0016125(sterol metabolic process);GO:0016132(brassinosteroid biosynthetic process)	NA
ath-miR396a-5p_1ss2TC	RrubChr5G00128130.1	RrubChr5G00128130	uncharacterized protein LOC105166375 [Sesamum indicum]	GO:0003674(molecular_function);GO:0005768(endosome);GO:0005783(endoplasmic reticulum);GO:0005794(Golgi apparatus);GO:0005802(trans-Golgi network);GO:0016021(integral component of membrane);GO:0042538(hyperosmotic salinity response);GO:0043182(vacuolar sequestering of sodium ion)	NA
ath-miR396a-5p_1ss2TC	RrubChr5G00130060.1	RrubChr5G00130060	growth-regulating factor 1 isoform X1 [Sesamum indicum]	GO:0005634(nucleus);GO:0009739(response to gibberellin);GO:0030912(response to deep water)	NA
ath-miR396a-5p_1ss2TC	RrubChr6G00140080.1	RrubChr6G00140080	hypothetical protein CDL12_13550 [Handroanthus impetiginosus]	GO:0003674(molecular_function);GO:0009507(chloroplast);GO:0009535(chloroplast thylakoid membrane);GO:0009631(cold acclimation);GO:0009737(response to abscisic acid);GO:0009941(chloroplast envelope);GO:0031357(integral component of chloroplast inner membrane);GO:0042631(cellular response to water deprivation);GO:0070417(cellular response to cold)	ko03013(RNA transport)
ath-miR396a-5p_1ss2TC	RrubChr6G00144230.1	RrubChr6G00144230	growth-regulating factor 9 [Sesamum indicum]	GO:0005515(protein binding);GO:0005524(ATP binding);GO:0005634(nucleus);GO:0006351(transcription, DNA-templated);GO:0006355(regulation of transcription, DNA-templated);GO:0032502(developmental process);GO:0048366(leaf development)	NA
ath-miR396a-5p_1ss2TC	RrubChr6G00148620.1	RrubChr6G00148620	probable aspartyl protease At4g16563 [Sesamum indicum]	GO:0004190(aspartic-type endopeptidase activity);GO:0006508(proteolysis);GO:0030163(protein catabolic process)	NA
ath-miR396a-5p_1ss2TC	RrubChr6G00149860.1	RrubChr6G00149860	RNA polymerase, 25-kDa subunit (common to polymerases I, II and III) [Handroanthus impetiginosus]	GO:0000428(DNA-directed RNA polymerase complex);GO:0001054(RNA polymerase I activity);GO:0001055(RNA polymerase II activity);GO:0001056(RNA polymerase III activity);GO:0003899(DNA-directed 5'-3' RNA polymerase activity);GO:0005665(DNA-directed RNA polymerase II, core complex);GO:0005666(DNA-directed RNA polymerase III complex);GO:0005736(DNA-directed RNA polymerase I complex)	ko00230(Purine metabolism);ko00240(Pyrimidine metabolism);ko03020(RNA polymerase)
ath-miR396a-5p_1ss2TC	RrubChr6G00155090.1	RrubChr6G00155090	growth-regulating factor 2 [Sesamum indicum]	GO:0005634(nucleus);GO:0009739(response to gibberellin);GO:0030912(response to deep water)	NA
ath-miR396a-5p_1ss2TC	RrubChr7G00182120.1	RrubChr7G00182120	growth-regulating factor 1 [Sesamum indicum]	GO:0005515(protein binding);GO:0005524(ATP binding);GO:0005634(nucleus);GO:0006351(transcription, DNA-templated);GO:0006355(regulation of transcription, DNA-templated);GO:0009624(response to nematode);GO:0019760(glucosinolate metabolic process);GO:0043565(sequence-specific DNA binding);GO:0048364(root development);GO:0048366(leaf development);GO:0061062(regulation of nematode larval development)	NA
ath-miR396a-5p_1ss2TC	RrubChr9G00229140.1	RrubChr9G00229140	growth-regulating factor 4-like isoform X1 [Sesamum indicum]	GO:0005737(cytoplasm);GO:0008757(S-adenosylmethionine-dependent methyltransferase activity);GO:0032259(methylation)	NA
ath-miR396a-5p_1ss2TC	RrubChr4G00097650.1	RrubChr4G00097650	PREDICTED: probable galacturonosyltransferase-like 9 [Erythranthe guttata]	GO:0000271(polysaccharide biosynthetic process);GO:0005794(Golgi apparatus);GO:0016757(transferase activity, transferring glycosyl groups)	NA
ath-miR396a-5p_1ss2TC	RrubChr8G00199450.1	RrubChr8G00199450	PREDICTED: uncharacterized protein LOC105968055 [Erythranthe guttata]	GO:0005515(protein binding);GO:0005634(nucleus);GO:0005783(endoplasmic reticulum);GO:0005789(endoplasmic reticulum membrane);GO:0006914(autophagy);GO:0015031(protein transport);GO:0016021(integral component of membrane);GO:0043231(intracellular membrane-bounded organelle)	NA
ath-miR396b-3p	RrubChr10G00257050.1	RrubChr10G00257050	vesicle-associated membrane protein 722 [Cynara cardunculus var. scolymus]	GO:0000149(SNARE binding);GO:0005484(SNAP receptor activity);GO:0006887(exocytosis);GO:0006906(vesicle fusion);GO:0031201(SNARE complex)	NA
ath-miR396b-3p	RrubChr11G00273890.1	RrubChr11G00273890	putative UPF0481 protein At3g02645 [Sesamum indicum]	GO:0005886(plasma membrane);GO:0008150(biological_process)	NA
ath-miR396b-3p	RrubChr5G00119960.1	RrubChr5G00119960	superoxide dismutase [Fe], chloroplastic [Sesamum indicum]	GO:0004784(superoxide dismutase activity);GO:0005515(protein binding);GO:0009295(nucleoid);GO:0009411(response to UV);GO:0009507(chloroplast);GO:0009534(chloroplast thylakoid);GO:0009579(thylakoid);GO:0042644(chloroplast nucleoid);GO:0046872(metal ion binding);GO:0055114(oxidation-reduction process)	ko04146(Peroxisome)
ath-miR396b-3p	RrubChr5G00129050.1	RrubChr5G00129050	PREDICTED: transcription factor bHLH35-like isoform X2 [Nicotiana sylvestris]	GO:0003677(DNA binding);GO:0003700(DNA binding transcription factor activity);GO:0005634(nucleus);GO:0006351(transcription, DNA-templated);GO:0006355(regulation of transcription, DNA-templated);GO:0046983(protein dimerization activity)	NA
ath-miR396b-3p	RrubChr7G00187220.1	RrubChr7G00187220	Porin/voltage-dependent anion-selective channel protein [Handroanthus impetiginosus]	GO:0005515(protein binding);GO:0005739(mitochondrion);GO:0005741(mitochondrial outer membrane);GO:0005773(vacuole);GO:0005774(vacuolar membrane);GO:0005794(Golgi apparatus);GO:0005886(plasma membrane);GO:0006820(anion transport);GO:0006952(defense response);GO:0008308(voltage-gated anion channel activity);GO:0009507(chloroplast);GO:0009536(plastid);GO:0009617(response to bacterium);GO:0009941(chl…	NA
ath-miR396b-3p	RrubChr9G00225680.1	RrubChr9G00225680	sacsin [Sesamum indicum]	GO:0005737(cytoplasm);GO:0008270(zinc ion binding);GO:0009506(plasmodesma)	NA
ath-miR396b-3p	RrubChr9G00233380.1	RrubChr9G00233380	homeobox protein ATH1-like [Sesamum indicum]	GO:0003677(DNA binding);GO:0003700(DNA binding transcription factor activity);GO:0005515(protein binding);GO:0005634(nucleus);GO:0006351(transcription, DNA-templated);GO:0006355(regulation of transcription, DNA-templated);GO:0008285(negative regulation of cell proliferation);GO:0009640(photomorphogenesis);GO:0010073(meristem maintenance);GO:0010227(floral organ abscission);GO:0010228(vegetative t…	NA
ath-miR396b-3p	RrubChr1G00007990.1	RrubChr1G00007990	respiratory burst oxidase homolog protein C-like isoform X1 [Olea europaea var. sylvestris]	GO:0004601(peroxidase activity);GO:0005509(calcium ion binding);GO:0005634(nucleus);GO:0005887(integral component of plasma membrane);GO:0006952(defense response);GO:0009060(aerobic respiration);GO:0010053(root epidermal cell differentiation);GO:0016174(NAD(P)H oxidase activity);GO:0033198(response to ATP)	ko04016(MAPK signaling pathway - plant);ko04626(Plant-pathogen interaction)
ath-miR396b-3p_L-1R-2_1ss2CT	RrubChr10G00246640.1	RrubChr10G00246640	Ubiquitin--protein ligase [Handroanthus impetiginosus]	GO:0005634(nucleus);GO:0005737(cytoplasm)	NA
ath-miR396b-3p_L-1R-2_1ss2CT	RrubChr10G00256930.1	RrubChr10G00256930	PREDICTED: callose synthase 9 [Erythranthe guttata]	GO:0000148(1,3-beta-D-glucan synthase complex);GO:0003843(1,3-beta-D-glucan synthase activity);GO:0005886(plasma membrane)	NA
ath-miR396b-3p_L-1R-2_1ss2CT	RrubChr11G00259790.1	RrubChr11G00259790	60S ribosomal protein L18-2 [Sesamum indicum]	GO:0003723(RNA binding);GO:0003735(structural constituent of ribosome);GO:0006412(translation);GO:0022625(cytosolic large ribosomal subunit)	ko03010(Ribosome)
ath-miR396b-3p_L-1R-2_1ss2CT	RrubChr11G00269240.1	RrubChr11G00269240	hypothetical protein CDL12_26289 [Handroanthus impetiginosus]	GO:0005739(mitochondrion);GO:0009536(plastid);GO:0009926(auxin polar transport);GO:0009941(chloroplast envelope);GO:0010224(response to UV-B)	NA
ath-miR396b-3p_L-1R-2_1ss2CT	RrubChr11G00274200.1	RrubChr11G00274200	NA	NA	NA
ath-miR396b-3p_L-1R-2_1ss2CT	RrubChr12G00293030.1	RrubChr12G00293030	putative glycosyltransferase [Vitis vinifera]	GO:0000139(Golgi membrane);GO:0003824(catalytic activity);GO:0005794(Golgi apparatus);GO:0006486(protein glycosylation);GO:0016020(membrane);GO:0016021(integral component of membrane);GO:0016757(transferase activity, transferring glycosyl groups);GO:0071555(cell wall organization)	NA
ath-miR396b-3p_L-1R-2_1ss2CT	RrubChr1G00004880.1	RrubChr1G00004880	probable helicase DDB_G0274399 [Sesamum indicum]	GO:0005634(nucleus);GO:0008150(biological_process);GO:0009506(plasmodesma);GO:0016787(hydrolase activity)	NA
ath-miR396b-3p_L-1R-2_1ss2CT	RrubChr1G00006210.1	RrubChr1G00006210	hypothetical protein CDL12_11679 [Handroanthus impetiginosus]	GO:0009507(chloroplast);GO:0016020(membrane);GO:0016021(integral component of membrane);GO:0031969(chloroplast membrane)	NA
ath-miR396b-3p_L-1R-2_1ss2CT	RrubChr1G00008050.1	RrubChr1G00008050	ACT domain-containing protein ACR11-like [Sesamum indicum]	GO:0009409(response to cold);GO:0009416(response to light stimulus);GO:0009507(chloroplast);GO:0009535(chloroplast thylakoid membrane);GO:0009570(chloroplast stroma);GO:0009735(response to cytokinin);GO:0009744(response to sucrose);GO:0009941(chloroplast envelope);GO:0010319(stromule);GO:0016779(nucleotidyltransferase activity)	ko00510(N-Glycan biosynthesis)
ath-miR396b-3p_L-1R-2_1ss2CT	RrubChr1G00018340.1	RrubChr1G00018340	glucose-6-phosphate isomerase 1, chloroplastic [Sesamum indicum]	GO:0004347(glucose-6-phosphate isomerase activity);GO:0005829(cytosol);GO:0005982(starch metabolic process);GO:0006094(gluconeogenesis);GO:0006096(glycolytic process);GO:0009507(chloroplast);GO:0009536(plastid);GO:0009570(chloroplast stroma);GO:0009911(positive regulation of flower development);GO:0009941(chloroplast envelope)	ko00010(Glycolysis / Gluconeogenesis);ko00030(Pentose phosphate pathway);ko00500(Starch and sucrose metabolism);ko00520(Amino sugar and nucleotide sugar metabolism)
ath-miR396b-3p_L-1R-2_1ss2CT	RrubChr2G00041560.1	RrubChr2G00041560	cyclic dof factor 1 [Sesamum indicum]	GO:0003677(DNA binding);GO:0003700(DNA binding transcription factor activity);GO:0005515(protein binding);GO:0005634(nucleus);GO:0006351(transcription, DNA-templated);GO:0006355(regulation of transcription, DNA-templated);GO:0009908(flower development);GO:0043565(sequence-specific DNA binding);GO:0046872(metal ion binding);GO:0048510(regulation of timing of transition from vegetative to reproduct…	ko04712(Circadian rhythm - plant)
ath-miR396b-3p_L-1R-2_1ss2CT	RrubChr2G00056470.1	RrubChr2G00056470	phosphoglycolate phosphatase 1B, chloroplastic-like [Sesamum indicum]	GO:0005829(cytosol);GO:0016311(dephosphorylation);GO:0016791(phosphatase activity)	ko00630(Glyoxylate and dicarboxylate metabolism)
ath-miR396b-3p_L-1R-2_1ss2CT	RrubChr4G00091130.1	RrubChr4G00091130	Peroxidase [Handroanthus impetiginosus]	GO:0004601(peroxidase activity);GO:0009505(plant-type cell wall);GO:0009664(plant-type cell wall organization)	ko00940(Phenylpropanoid biosynthesis)
ath-miR396b-3p_L-1R-2_1ss2CT	RrubChr4G00102360.1	RrubChr4G00102360	RING-H2 finger protein ATL16 [Sesamum indicum]	GO:0005634(nucleus);GO:0008270(zinc ion binding);GO:0009741(response to brassinosteroid);GO:0010200(response to chitin);GO:0016021(integral component of membrane);GO:0016567(protein ubiquitination);GO:0043161(proteasome-mediated ubiquitin-dependent protein catabolic process);GO:0061630(ubiquitin protein ligase activity)	NA
ath-miR396b-3p_L-1R-2_1ss2CT	RrubChr4G00106890.1	RrubChr4G00106890	hypothetical protein CDL12_24746 [Handroanthus impetiginosus]	GO:0003674(molecular_function);GO:0005886(plasma membrane);GO:0008150(biological_process);GO:0016021(integral component of membrane)	NA
ath-miR396b-3p_L-1R-2_1ss2CT	RrubChr5G00128580.1	RrubChr5G00128580	putative UPF0481 protein At3g02645 [Sesamum indicum]	NA	NA
ath-miR396b-3p_L-1R-2_1ss2CT	RrubChr5G00129050.1	RrubChr5G00129050	PREDICTED: transcription factor bHLH35-like isoform X2 [Nicotiana sylvestris]	GO:0003677(DNA binding);GO:0003700(DNA binding transcription factor activity);GO:0005634(nucleus);GO:0006351(transcription, DNA-templated);GO:0006355(regulation of transcription, DNA-templated);GO:0046983(protein dimerization activity)	NA
ath-miR396b-3p_L-1R-2_1ss2CT	RrubChr6G00147950.1	RrubChr6G00147950	pleiotropic drug resistance protein 2 [Sesamum indicum]	GO:0005886(plasma membrane);GO:0016021(integral component of membrane);GO:0042626(ATPase activity, coupled to transmembrane movement of substances)	ko02010(ABC transporters)
ath-miR396b-3p_L-1R-2_1ss2CT	RrubChr6G00161340.1	RrubChr6G00161340	Flavonol reductase/cinnamoyl-CoA reductase [Handroanthus impetiginosus]	GO:0005575(cellular_component);GO:0009809(lignin biosynthetic process);GO:0016621(cinnamoyl-CoA reductase activity);GO:0080167(response to karrikin)	ko00940(Phenylpropanoid biosynthesis)
ath-miR396b-3p_L-1R-2_1ss2CT	RrubChr7G00187220.1	RrubChr7G00187220	Porin/voltage-dependent anion-selective channel protein [Handroanthus impetiginosus]	GO:0005515(protein binding);GO:0005739(mitochondrion);GO:0005741(mitochondrial outer membrane);GO:0005773(vacuole);GO:0005774(vacuolar membrane);GO:0005794(Golgi apparatus);GO:0005886(plasma membrane);GO:0006820(anion transport);GO:0006952(defense response);GO:0008308(voltage-gated anion channel activity);GO:0009507(chloroplast);GO:0009536(plastid);GO:0009617(response to bacterium);GO:0009941(chl…	NA
ath-miR396b-3p_L-1R-2_1ss2CT	RrubChr8G00189810.1	RrubChr8G00189810	glucose-6-phosphate 1-dehydrogenase, chloroplastic [Sesamum indicum]	GO:0004345(glucose-6-phosphate dehydrogenase activity);GO:0005515(protein binding);GO:0006006(glucose metabolic process);GO:0009051(pentose-phosphate shunt, oxidative branch);GO:0009507(chloroplast);GO:0009570(chloroplast stroma);GO:0050661(NADP binding);GO:0055114(oxidation-reduction process)	ko00030(Pentose phosphate pathway);ko00480(Glutathione metabolism)
ath-miR396b-3p_L-1R-2_1ss2CT	RrubChr8G00194510.1	RrubChr8G00194510	transcription factor MYB39-like [Sesamum indicum]	GO:0000981(RNA polymerase II transcription factor activity, sequence-specific DNA binding);GO:0001135(transcription factor activity, RNA polymerase II transcription factor recruiting);GO:0003677(DNA binding);GO:0003700(DNA binding transcription factor activity);GO:0005634(nucleus);GO:0006351(transcription, DNA-templated);GO:0006355(regulation of transcription, DNA-templated);GO:0006357(regulation…	NA
ath-miR396b-3p_L-1R-2_1ss2CT	RrubChr8G00207800.1	RrubChr8G00207800	cytochrome b-c1 complex subunit Rieske-4, mitochondrial-like [Sesamum indicum]	GO:0005739(mitochondrion);GO:0005750(mitochondrial respiratory chain complex III);GO:0008121(ubiquinol-cytochrome-c reductase activity);GO:0016021(integral component of membrane);GO:0031966(mitochondrial membrane);GO:0046872(metal ion binding);GO:0051537(2 iron, 2 sulfur cluster binding);GO:0055114(oxidation-reduction process)	ko00190(Oxidative phosphorylation)
ath-miR396b-3p_L-1R-2_1ss2CT	RrubChr10G00237410.1	RrubChr10G00237410	hypothetical protein CDL12_27535 [Handroanthus impetiginosus]	GO:0003674(molecular_function);GO:0008150(biological_process)	NA
ath-miR396b-3p_L-1R-2_1ss2CT	RrubChr10G00259320.1	RrubChr10G00259320	callose synthase 9 [Sesamum indicum]	GO:0000148(1,3-beta-D-glucan synthase complex);GO:0003843(1,3-beta-D-glucan synthase activity);GO:0005886(plasma membrane)	NA
ath-miR396b-3p_L-1R-2_1ss2CT	RrubChr1G00003330.1	RrubChr1G00003330	vesicle-associated membrane protein 721-like [Sesamum indicum]	GO:0000149(SNARE binding);GO:0005484(SNAP receptor activity);GO:0006887(exocytosis);GO:0006906(vesicle fusion);GO:0031201(SNARE complex)	NA
ath-miR396b-3p_L-1R-2_1ss2CT	RrubChr1G00006380.1	RrubChr1G00006380	subtilisin-like protease SBT3.5 [Sesamum indicum]	GO:0004252(serine-type endopeptidase activity);GO:0005618(cell wall)	NA
ath-miR396b-3p_L-1R-2_1ss2CT	RrubChr3G00058700.1	RrubChr3G00058700	probable protein phosphatase 2C 38 isoform X2 [Sesamum indicum]	GO:0004722(protein serine/threonine phosphatase activity);GO:0005515(protein binding);GO:0005886(plasma membrane);GO:0006470(protein dephosphorylation);GO:0046872(metal ion binding);GO:1900425(negative regulation of defense response to bacterium)	NA
ath-miR396b-3p_L-1R-2_1ss2CT	RrubChr3G00064230.1	RrubChr3G00064230	hypothetical protein CDL12_04561 [Handroanthus impetiginosus]	GO:0003674(molecular_function);GO:0008150(biological_process);GO:0009507(chloroplast)	NA
ath-miR396b-3p_L-1R-2_1ss2CT	RrubChr6G00154170.1	RrubChr6G00154170	scarecrow-like protein 8 [Sesamum indicum]	GO:0003700(DNA binding transcription factor activity);GO:0005634(nucleus);GO:0006355(regulation of transcription, DNA-templated);GO:0043565(sequence-specific DNA binding)	NA
ath-miR396b-3p_L-1R-2_1ss2CT	RrubChr8G00199600.1	RrubChr8G00199600	hypothetical protein CDL12_24120 [Handroanthus impetiginosus]	GO:0005739(mitochondrion);GO:0008150(biological_process);GO:0008270(zinc ion binding)	ko00600(Sphingolipid metabolism);ko00511(Other glycan degradation)
ath-miR396b-3p_L-1R-2_1ss2CT	RrubChr8G00203380.1	RrubChr8G00203380	uncharacterized protein LOC105174992 [Sesamum indicum]	GO:0003674(molecular_function);GO:0008150(biological_process);GO:0009507(chloroplast);GO:0016021(integral component of membrane)	NA
ath-miR396b-3p_L-1R-2_1ss2CT	RrubChr9G00218190.1	RrubChr9G00218190	LOW QUALITY PROTEIN: pleiotropic drug resistance protein 2-like [Sesamum indicum]	GO:0005886(plasma membrane);GO:0016021(integral component of membrane);GO:0042626(ATPase activity, coupled to transmembrane movement of substances)	ko02010(ABC transporters)
ath-miR396b-5p	RrubChr10G00235430.1	RrubChr10G00235430	DNA replication licensing factor, MCM7 component [Handroanthus impetiginosus]	GO:0000347(THO complex);GO:0003677(DNA binding);GO:0003678(DNA helicase activity);GO:0005515(protein binding);GO:0005524(ATP binding);GO:0005634(nucleus);GO:0005737(cytoplasm);GO:0005829(cytosol);GO:0006268(DNA unwinding involved in DNA replication);GO:0006270(DNA replication initiation);GO:0006351(transcription, DNA-templated);GO:0006355(regulation of transcription, DNA-templated);GO:0007049(cel…	ko03030(DNA replication)
ath-miR396b-5p	RrubChr10G00245870.1	RrubChr10G00245870	growth-regulating factor 2 [Sesamum indicum]	GO:0005524(ATP binding);GO:0005634(nucleus);GO:0006351(transcription, DNA-templated);GO:0006355(regulation of transcription, DNA-templated);GO:0010114(response to red light);GO:0010218(response to far red light);GO:0048366(leaf development);GO:0080167(response to karrikin)	NA
ath-miR396b-5p	RrubChr10G00252280.1	RrubChr10G00252280	probable protein phosphatase 2C 10 isoform X1 [Sesamum indicum]	GO:0004722(protein serine/threonine phosphatase activity);GO:0005634(nucleus);GO:0005886(plasma membrane);GO:0006470(protein dephosphorylation);GO:0046872(metal ion binding)	NA
ath-miR396b-5p	RrubChr11G00265180.1	RrubChr11G00265180	protein TIC110, chloroplastic isoform X2 [Sesamum indicum]	GO:0005515(protein binding);GO:0009507(chloroplast);GO:0009536(plastid);GO:0009658(chloroplast organization);GO:0009941(chloroplast envelope);GO:0016020(membrane);GO:0016021(integral component of membrane);GO:0031897(Tic complex);GO:0045037(protein import into chloroplast stroma);GO:0061927(TOC-TIC supercomplex I)	NA
ath-miR396b-5p	RrubChr11G00269770.1	RrubChr11G00269770	photosystem II reaction center W protein, chloroplastic [Sesamum indicum]	GO:0003674(molecular_function);GO:0009507(chloroplast);GO:0009523(photosystem II);GO:0009535(chloroplast thylakoid membrane);GO:0015979(photosynthesis);GO:0016021(integral component of membrane);GO:0042549(photosystem II stabilization)	ko00195(Photosynthesis)
ath-miR396b-5p	RrubChr11G00270010.1	RrubChr11G00270010	protein transport protein Sec24-like At3g07100 [Sesamum indicum]	GO:0000139(Golgi membrane);GO:0005215(transporter activity);GO:0005515(protein binding);GO:0005737(cytoplasm);GO:0005789(endoplasmic reticulum membrane);GO:0005829(cytosol);GO:0006810(transport);GO:0006886(intracellular protein transport);GO:0006888(ER to Golgi vesicle-mediated transport);GO:0007029(endoplasmic reticulum organization);GO:0007030(Golgi organization);GO:0008270(zinc ion binding);GO…	ko04141(Protein processing in endoplasmic reticulum)
ath-miR396b-5p	RrubChr11G00271640.1	RrubChr11G00271640	growth-regulating factor 4-like isoform X3 [Sesamum indicum]	GO:0005737(cytoplasm);GO:0008757(S-adenosylmethionine-dependent methyltransferase activity);GO:0032259(methylation)	NA
ath-miR396b-5p	RrubChr11G00274200.1	RrubChr11G00274200	NA	NA	NA
ath-miR396b-5p	RrubChr11G00281260.1	RrubChr11G00281260	uncharacterized protein LOC105166397 [Sesamum indicum]	NA	NA
ath-miR396b-5p	RrubChr12G00290410.1	RrubChr12G00290410	D-glycerate 3-kinase, chloroplastic [Sesamum indicum]	GO:0004849(uridine kinase activity);GO:0005829(cytosol);GO:0006206(pyrimidine nucleobase metabolic process);GO:0043097(pyrimidine nucleoside salvage)	ko00630(Glyoxylate and dicarboxylate metabolism);ko00561(Glycerolipid metabolism);ko00260(Glycine, serine and threonine metabolism)
ath-miR396b-5p	RrubChr1G00016990.1	RrubChr1G00016990	growth-regulating factor 6 [Sesamum indicum]	GO:0005515(protein binding);GO:0005524(ATP binding);GO:0005634(nucleus);GO:0006351(transcription, DNA-templated);GO:0006355(regulation of transcription, DNA-templated);GO:0009624(response to nematode);GO:0019760(glucosinolate metabolic process);GO:0043565(sequence-specific DNA binding);GO:0048364(root development);GO:0048366(leaf development);GO:0061062(regulation of nematode larval development)	NA
ath-miR396b-5p	RrubChr2G00030860.1	RrubChr2G00030860	GDSL esterase/lipase At3g48460 [Sesamum indicum]	GO:0005576(extracellular region);GO:0006631(fatty acid metabolic process);GO:0008126(acetylesterase activity);GO:0016042(lipid catabolic process);GO:0052689(carboxylic ester hydrolase activity)	ko00901(Indole alkaloid biosynthesis)
[truncated: 7,867 more rows]
